1 **Transcriptional and Functional Activity of Canine Hemangiosarcoma to Support**  
2 **Hematopoiesis Demonstrate Bone Marrow Nurse Cell Ontogeny**

3 Jong Hyuk Kim<sup>1-3,\*</sup>, Ashley J. Schulte<sup>1-3</sup>, Aaron L. Sarver<sup>1,3,4</sup>, Mathew G. Angelos<sup>5,6,7,8</sup>, Aric M.  
4 Frantz<sup>1-3</sup>, Colleen L. Forster<sup>10</sup>, Timothy D. O'Brien<sup>1,3,5,9</sup>, Ingrid Cornax<sup>1,3,9,11</sup>, M. Gerard  
5 O'Sullivan<sup>1,3,9</sup>, Nuojin Cheng<sup>12,13</sup>, Mitzi Lewellen<sup>1-3</sup>, LeAnn Oseth<sup>3</sup>, Sunil Kumar<sup>9</sup>, Susan  
6 Bullman<sup>14,15</sup>, Chandra Sekhar Pedamallu<sup>14,16</sup>, Sagar M. Goyal<sup>9</sup>, Matthew Meyerson<sup>14,16</sup>, Troy C.  
7 Lund<sup>17</sup>, Jessica Alfoldi<sup>14</sup>, Kerstin Lindblad-Toh<sup>14,18</sup>, Matthew Breen<sup>19,20</sup>, Erin B. Dickerson<sup>1-3</sup>,  
8 Dan S. Kaufman<sup>3,5,6,21,22</sup>, Jaime F. Modiano<sup>1-3,5,19, 23</sup>

9

10 <sup>1</sup>Animal Cancer Care and Research Program, University of Minnesota, St Paul, MN;  
11 <sup>2</sup>Department of Veterinary Clinical Sciences, College of Veterinary Medicine, University of  
12 Minnesota, St Paul, MN; <sup>3</sup>Masonic Cancer Center, University of Minnesota, Minneapolis, MN;  
13 <sup>4</sup>Institute for Health Informatics, University of Minnesota, Minneapolis, MN; <sup>5</sup>Stem Cell  
14 Institute, University of Minnesota, Minneapolis, MN; <sup>6</sup>Department of Medicine (Division of  
15 Hematology, Oncology, and Transplantation), Medical School, University of Minnesota,  
16 Minneapolis, MN; <sup>7</sup>Microbiology, Immunology and Cancer Biology (MICaB) Graduate  
17 Program, University of Minnesota, Minneapolis, MN; <sup>8</sup>Internal Medicine, Hospital of the  
18 University of Pennsylvania, Philadelphia, PA; <sup>9</sup>Department of Veterinary Population Medicine,  
19 College of Veterinary Medicine, University of Minnesota, St Paul, MN; <sup>10</sup>The University of  
20 Minnesota Biological Materials Procurement Network (BioNet), University of Minnesota,  
21 Minneapolis, MN; <sup>11</sup>Janssen Research and Development, LLC; <sup>12</sup>School of Mathematics,  
22 College of Science and Engineering at the University of Minnesota, Minneapolis; <sup>13</sup>Applied  
23 Mathematics, University of Colorado Boulder, Boulder, CO; <sup>14</sup>Broad Institute of MIT and

24 Harvard, Cambridge, MA; <sup>15</sup>Human Biology Division, Fred Hutchinson Cancer Research Center,  
25 Seattle, WA; <sup>16</sup>Department of Medical Oncology, Dana-Farber Cancer Institute and Harvard  
26 Medical School, Boston, MA; <sup>17</sup>Department of Pediatrics, Medical School, University of  
27 Minnesota, Minneapolis, MN; <sup>18</sup>Science of Life Laboratory, Department of Medical  
28 Biochemistry and Microbiology, Uppsala University, Uppsala, Sweden; <sup>19</sup>Department of  
29 Molecular Biomedical Sciences, College of Veterinary Medicine, & Comparative Medicine  
30 Institute, North Carolina State University, Raleigh, NC; <sup>20</sup>Cancer Genetics Program, University  
31 of North Carolina Lineberger Comprehensive Cancer Center, Raleigh, NC; <sup>21</sup>Center for  
32 Immunology, University of Minnesota, Minneapolis, MN; <sup>22</sup>Division of Regenerative Medicine,  
33 Department of Medicine, , La Jolla, CA; <sup>23</sup>Department of Laboratory Medicine and Pathology,  
34 Medical School, University of Minnesota, Minneapolis, MN

35

36 \*Corresponding author: Jong Hyuk Kim, Masonic Cancer Center, University of Minnesota,  
37 Minneapolis, MN 55455, USA.

38 Tel.:+1 612-624-3612; E-mail: [jhkim@umn.edu](mailto:jhkim@umn.edu)

39

40 **Running Title:** Bone marrow nurse cell ontogeny of hemangiosarcoma

41 **Key Points:**

- 42 • Canine hemangiosarcoma supports expansion and differentiation of human hematopoietic  
43 progenitors, enabling development of hematopoietic tumors.
- 44 • Molecular programs of canine hemangiosarcoma that support hematopoiesis and create a  
45 tumor immune niche resemble those of bone marrow nurse cells.

46

47 **Abstract**

48 Hemangiosarcoma and angiosarcoma are soft tissue sarcomas of malignant blood vessel-forming  
49 cells in dogs and humans, respectively. These vasoformative sarcomas are aggressive and highly  
50 metastatic, with disorganized, irregular blood-filled vascular spaces. Our objective was to define  
51 molecular programs that support the niche, enabling progression of canine hemangiosarcoma and  
52 human angiosarcoma. Here, we show that the transcriptional landscape of canine  
53 hemangiosarcoma and human angiosarcoma included comparable angiogenic and inflammatory  
54 programs. Dog-in-mouse hemangiosarcoma xenografts recapitulated the vasoformative and  
55 highly angiogenic morphology and molecular characteristics of primary tumors. Blood vessels in  
56 the tumors were complex and disorganized, and they were lined by both donor and host cells, a  
57 trait that was not observed in xenografts from canine osteosarcoma and lymphoma. In some  
58 cases, the xenografted hemangiosarcoma cells created exuberant myeloid hyperplasia and gave  
59 rise to lymphoproliferative tumors of mouse origin. We did not uncover a definitive  
60 transmissible etiology, but our data indicate that transcriptional programs of hemangiosarcoma  
61 cells resemble those of hematopoietic nurse cells, and these malignant cells support expansion  
62 and differentiation of human hematopoietic progenitors. We conclude that canine  
63 hemangiosarcoma, and possibly human angiosarcoma, originate from nurse cells that make up  
64 the stromal bone marrow niche, and that these cells may also support the growth of  
65 hematopoietic tumors.

66

67 **Keywords:** angiosarcoma, bone marrow, hemangiosarcoma, hematopoiesis, tumor immunity,  
68 tumor niche, tumor ontogeny.

## 69 **Introduction**

70 Canine hemangiosarcoma is a vasoformative tumor originating from bone marrow (BM)-derived  
71 progenitor cells.<sup>1-4</sup> Unlike human angiosarcoma, which is a rare disease, spontaneous  
72 hemangiosarcoma occurs commonly in dogs. The histology and natural history of these tumors is  
73 similar in both species: both are comprised of disorganized, tortuous, dilated blood vessels with  
74 moderate to high proliferative activity and extremely high metastatic potential.<sup>5,6</sup> Furthermore,  
75 canine hemangiosarcoma and human angiosarcoma appear to establish convergent molecular  
76 programs despite their genomic complexity.<sup>7</sup>

77  
78 Angiogenesis and inflammation are key molecular features of canine hemangiosarcoma,<sup>8</sup> and  
79 convergent transcriptional programs regulating these processes are also observed in human  
80 angiosarcoma.<sup>7</sup> These molecular programs are the foundation for a novel subclassification of  
81 canine hemangiosarcoma.<sup>4</sup> However, the contribution of the tumor microenvironment to these  
82 programs remains incompletely understood. The microenvironment creates the tumor niche, a  
83 complex of cellular and non-cellular components that are essential for tumor cell survival,  
84 disease progression, and metastasis.<sup>9</sup> Emerging data suggest that cancer cells re-educate niche  
85 cells; and conversely, niche cells modulate the function of cancer cells.<sup>9-11</sup> This effect is  
86 especially important for sustaining stemness and self-renewal of cancer stem cells in both solid  
87 and hematopoietic tumors.<sup>12-14</sup>

88  
89 The hematopoietic niche consists of osteoblasts, and various stromal nurse cells, including  
90 endosteal endothelial cells, fibroblasts, sinusoidal nestin-positive mesenchymal stromal cells,  
91 sinusoidal leptin receptor-positive stromal cells, and CXCL12-abundant reticular (CAR) cells.

92 Together, these cells support hematopoietic stem and progenitor cells (HSPCs) to proliferate and  
93 differentiate into lineage-committed cells, promoting hematopoiesis.<sup>15</sup> Impairment of the  
94 regulation of HSPCs can cause numerous blood disorders,<sup>16,17</sup> as well as hematopoietic  
95 malignancies such as leukemia and lymphoma.<sup>18-20</sup>

96  
97 Our goal was to define the molecular origin of canine hemangiosarcoma and human  
98 angiosarcoma. Our data indicate that components of the transcriptional programs in these tumors  
99 resemble those of bone marrow nurse cells, and that in addition to their capability to form  
100 vasoformative tumors, canine hemangiosarcoma cells create a niche for expansion and  
101 differentiation of blood cells.

102

## 103 **Methods**

### 104 **Canine samples and cell lines**

105 HSA cell lines (SB, COSB, Emma, DD1, JHE, and JLU) were previously established.<sup>1,2,21-24</sup>  
106 Canine tissue samples were obtained from surgical removal or biopsy of tumor at the University  
107 of Minnesota or private veterinary clinics, and additional HSA cell lines (DHSA-1401, DHSA-  
108 1420, and DHSA-1426) were generated and cultured as described previously.<sup>1,2,22</sup> All protocols  
109 and procedures for sample procurement were reviewed by the Institutional Animal Care and Use  
110 Committee (IACUC; protocols 0802A27363, 1101A94713, 1312-31131A) of the University of  
111 Minnesota.

112

### 113 **Human and mouse cell lines**

114 Human BM-derived mesenchymal stromal cells (hBM-MSCs) were isolated from whole bone

115 marrow purchased from AllCells (Emeryville, CA, USA) as previously described.<sup>25-28</sup> M2-10B4  
116 murine bone marrow stromal cells were purchased from the ATCC (Manassas, VA, USA) and  
117 maintained as previously described.<sup>26</sup> Human umbilical cord blood (hUCB) samples were  
118 obtained from the University of Colorado Cord Blood Bank, ClinImmune Stem Cell  
119 Laboratory.<sup>29</sup>

120

### 121 **Mice and xenotransplantation**

122 Female NOD-Scid-Gamma (NSG) and Beige-Nude-Xid (BNX) mice were used for adult  
123 xenografts. Both male and female NSG mice were used for neonatal xenografts. All mice were  
124 housed and handled according to the Research Animal Resources (RAR) husbandry and care  
125 protocols. Procedures for breeding animals and for tumor implantation were reviewed by the  
126 IACUC of the University of Minnesota (protocols 1006A84813, 1106A00649, 1306-30712A,  
127 and 1311-31104A). We performed xenotransplantations in a total of 132 mice as detailed in  
128 **Table S1.**

129 First, we injected cultured-tumor cells from three HSA cell lines (SB, Emma, and JHE) in 150  
130  $\mu\text{L}$  of PBS into irradiated (200gy) NSG mice (N=20):  $5 \times 10^6$  SB cells were injected into the  
131 subcutaneous (SQ) space of four mice and 5 or  $10 \times 10^6$  SB cells were injected intraperitoneally  
132 (IP) into four mice;  $2 \times 10^6$  Emma cells were injected into four mice each by the SQ and IP  
133 routes; and  $3 \times 10^5$  JHE cells were injected into four mice by the SQ route. Second, we injected  
134 tumor cells from five HSA cell lines (Emma, DD1, JLU, DHSA-1401, and COSB) into NSG  
135 neonates (1 or 2 days after birth; N=52):  $5 \times 10^5$  Emma, DD1, JLU, or DHSA-1401 cells, or  
136  $6.25 \times 10^5$  COSB cells were injected IP in 50  $\mu\text{L}$  of PBS. Third, we injected  $5 \times 10^6$  cells from  
137 three HSA cell lines (JLU, DHSA-1420, and DHSA-1426) in a mixture of 100  $\mu\text{L}$  of PBS and

138 100  $\mu$ L of BD Matrigel<sup>TM</sup> Basement Membrane Matrix (Growth Factor Reduced; BD  
139 Biosciences, Bedford, MA) into the SQ space of BNX mice (N=12). For DHSA-1426, we  
140 injected tumor cells from passage-5 and passage-14, independently. We used BNX mice for  
141 patient-derived tumor xenograft. Sections of viable tumor from four dogs affected with HSA  
142 (DHSA-1413, DHSA-1416, DHSA-1420, and DHSA-1426) were each dissected and implanted  
143 into subcutaneous pockets of four mice (N=16). Sections of non-HSA splenic tissues from seven  
144 dogs were similarly implanted into 18 mice as controls. The tissues included sections from  
145 splenic hematomas (DHSA-1412, DHSA-1417, DHSA-1419, DHSA-1421, and DHSA-1430).  
146 Finally, after visible tumors developed in mice, we serially transplanted the tumors by  
147 inoculation of cultured tumor cells (N=3 mice); or by direct implantation of single cell  
148 suspensions of the tumor (N=8 mice). Mice were sacrificed when they reached a tumor endpoint,  
149 including a mass measuring 1.5 cm in the longest diameter, or at the end of a 16-week period  
150 after xenotransplantation.

151

## 152 **Statistical analysis**

153 Mann-Whitney U test or Welch's (Heteroscedastic) t-test were performed to determine  
154 differences of continuous values between two groups. Pearson's correlation coefficient was  
155 calculated for correlation between two variables. Statistical analysis was performed using  
156 GraphPad Prism 6 (GraphPad Software, Inc., San Diego, CA, USA) or Microsoft Excel. Kaplan-  
157 Meier survival analysis and log rank test were performed for survival difference using R  
158 programming. P-values are presented without inference of significance, consistent with the  
159 American Statistical Association's Statement on P-Values.<sup>30</sup>

160

161 Detailed and additional materials and methods are provided in the supplemental Methods.

162

## 163 **Results**

### 164 **Canine hemangiosarcoma and human angiosarcoma show parallel transcriptional** 165 **programs and patterns of immune cell infiltration**

166 Canine hemangiosarcomas can be classified into angiogenic, inflammatory, and adipogenic  
167 subtypes based on their transcriptional programs (**Figure S1A**).<sup>4,7</sup> This separation is  
168 prognostically significant: of the 43 dogs in this cohort for which we had treatment and outcome  
169 data, those with inflammatory hemangiosarcomas accounted for nearly all that showed prolonged  
170 survival (>150 days, **Figure S1B**). Intriguingly, the subset of dogs whose hemangiosarcomas had  
171 a predominant angiogenic phenotype could be further subdivided into a group with a “pure  
172 angiogenic” molecular signature and a group with a “mixed angiogenic and inflammatory”  
173 molecular signature. Of these, the dogs whose tumors were purely angiogenic (*i.e.*, had deficient  
174 inflammatory signatures), showed the shortest overall survival times (**Figure S1B**).

175

176 Consistent with previously reports,<sup>31,32</sup> human angiosarcomas showed highly enriched  
177 angiogenic signatures.<sup>7</sup> However, the presence of inflammatory signatures in this tumor has not  
178 been thoroughly examined. Using a defined methodology to compare transcriptional signatures  
179 in tumors from different species,<sup>33</sup> we identified 588 differentially expressed genes in canine  
180 angiogenic and inflammatory hemangiosarcomas and evaluated the expression of their homologs  
181 in human angiosarcomas. **Figure S1C** shows that comparable angiogenic, inflammatory, and  
182 mixed angiogenic/inflammatory gene expression signatures were present in canine  
183 hemangiosarcomas and in human angiosarcomas.



184  
185 We then used bioinformatics approaches and immunostaining to establish whether the  
186 inflammatory gene signatures arose from the malignant cells themselves<sup>4</sup> or from inflammatory  
187 cell infiltrates within the tumors. ESTIMATE was used to assign tumor purity, and xCell was  
188 used to assign immune scores to each tumor: both tools resulted in consistent scores (**Figure**  
189 **S2A and B**). Predictably, the immune score for canine samples was correlated with the  
190 predominant transcriptional phenotype for the tumor; *i.e.*, angiogenic tumors had low immune  
191 scores and inflammatory tumors had high immune scores (**Figure S2C and D**). There was a  
192 similar correlation between transcriptional signatures and immune scores in human  
193 angiosarcomas (**Figure S2E and F**). To further verify that these were the result of immune and  
194 inflammatory cells present in the tumors, we stained sections from 11 canine hemangiosarcomas  
195 and 10 human angiosarcomas with antibodies against T cells (CD3), B cells (Pax5), myeloid  
196 cells (Mac387) and macrophages (Iba1 for canine; CD163 for human) (**Figure 1A and B**). CD3+  
197 T cells, PAX5+ B cells, MAC387+ myeloid cells and Iba1+ or CD163+ macrophages were  
198 detectable in both canine and human tumors. Myeloid cells were found most abundantly, while T  
199 cells ranged from rare to abundant and B cells were infrequent, and when they were present, the  
200 inflammatory cells were diffusely distributed throughout the tumor tissue. There was a direct  
201 correlation between xCell immune scores and immunohistochemistry scores for both the canine  
202 (Spearman R=0.38; P = 0.255) and human (Spearman R=0.78; P = 0.011) samples examined  
203 (**Figure 1C and D**).

204  
205 We next segregated human angiosarcomas into tumors with high and low immune scores  
206 (“immune-high” vs “immune-low”) and identified 461 up-regulated genes (FDR P < 0.05) in the

207 immune-high group compared to immune-low group (**Figure 1E**). Fifty-eight of these genes  
208 were also found in canine inflammatory hemangiosarcomas, and they were associated with T-  
209 and B-cell activation (**Figure 1F and G**). The similarity in tissue organization and infiltrating  
210 patterns of immune cells between the canine and human samples was striking, yet we were  
211 unable to confirm the prognostic value of the immune scores in human angiosarcoma because  
212 this sample set was not annotated with outcome data.

213

#### 214 **Canine hemangiosarcoma cells can recapitulate the disease *in vivo***

215 We used *in vivo* xenografts to examine the significance of the angiogenic and inflammatory  
216 phenotypes in tumor biological behavior.<sup>21,24,34-36</sup> We inoculated mice with canine  
217 hemangiosarcoma cell lines or primary tissues as described in Table S1. The engraftment  
218 efficiency of canine hemangiosarcoma xenografts was low: in these experiments, only cultured  
219 DHSA-1426 cells injected subcutaneously were able to reproducibly generate vasoformative  
220 tumors in immunodeficient BNX mice (**Figure 2**), and the tumorigenic potential of this cell line  
221 was maintained over multiple passages. These tumors could be serially passaged from cells  
222 cultured out of the tumor xenografts and injected into new recipient mice (**Figure S3**).

223

#### 224 **Xenografts enable quantification of the stromal contribution to the hemangiosarcoma** 225 **microenvironment**

226 To establish the contribution of stromal elements to the formation of canine hemangiosarcoma,  
227 we used fluorescence *in situ* hybridization (FISH) to enumerate canine and mouse cells in the  
228 tumors. We selected probes for canine *CXCL8*, since this gene is absent from the mouse genome,  
229 and for a unique region of the mouse X chromosome, to identify canine and mouse cells,

230 respectively. The data show that the hemangiosarcoma xenografts achieved a complex  
231 topological organization, with blood vessels lined concomitantly by donor and host cells (**Figure**  
232 **3A**). The pattern of organization seen in canine hemangiosarcoma xenografts was distinct from  
233 that of canine osteosarcoma and canine lymphoma xenografts (**Figure 3B**). The  
234 hemangiosarcoma tumors were comprised of a mixture of 50-70% malignant canine cells and  
235 30-50% mouse stromal cells. The cellular composition of orthotopic osteosarcoma xenografts  
236 was similar, but none of the malignant canine cells were seen lining blood vessels. The  
237 composition of lymphoma xenografts was remarkably different, including fewer than 5% mouse  
238 stromal cells. Malignant canine cells were also absent from the blood vessels in these tumors  
239 (**Figure 3C**).

240  
241 To establish the contribution of stromal elements to the gene expression signatures of canine  
242 hemangiosarcoma, we used a bioinformatics method that aggregates and then segregates  
243 transcripts by species<sup>37</sup> and identified 459 differentially expressed mouse (stromal) genes in the  
244 tumor xenografts (**Table S2**). We name-mapped these genes to the canine genome and examined  
245 their expression across all of the 76 samples of primary and metastatic canine hemangiosarcoma  
246 tumors. We then selected overlapping genes between the 1,477 subtype-specific genes that were  
247 differentially expressed across the three canine hemangiosarcoma subtypes and the 371 mouse-  
248 defined stromal genes (**Figure S4A**). This generated a list of 56 genes, whose expression was  
249 also examined across the primary and metastatic canine hemangiosarcoma samples (**Figure**  
250 **S4B**). Strikingly, the results from both analyses showed that the separation of tumors according  
251 to their molecular phenotype was retained in its entirety. It suggests that the transcriptional  
252 programs of tumor stroma are distinct among different types of hemangiosarcomas, and that

253 stromal elements are necessary and sufficient to define these different tumor types. However, our  
254 experiments do not exclude the possibility that “tumor-education” is responsible for the distinct  
255 patterns of gene expression in stromal elements.

256

257 **Canine hemangiosarcoma cells can induce expansion of hematopoietic cells as well as**  
258 **lymphoma cells *in vivo***

259 An unexpected series of results helped to inform the relationship between hemangiosarcoma and  
260 the presence of inflammation in the microenvironment. We and others showed previously that  
261 canine hemangiosarcoma cells could form hemangiosarcomas in NSG mice.<sup>7,21,24,35,36</sup> We also  
262 observed that some of the NSG mice inoculated with SB-HSA cells or with another cell line  
263 called Emma-brain (EFB), and some BNX mice inoculated with DHSA-1426 canine patient-  
264 derived tumor fragments developed what appeared to be round cell tumors. Four mice that  
265 received  $5 \times 10^6$  SB-HSA cells intraperitoneally and one of four mice that received  $2 \times 10^6$  EFB  
266 cells subcutaneously died acutely two weeks after inoculation. The mice showed evidence of  
267 anemia and splenomegaly. The spleens in all five mice were expanded by monomorphic  
268 populations of hematopoietic cells (**Figure S5A and B**). Upon further analysis, the cells were  
269 determined to be of mouse origin, representing erythroid progenitors (Ter-119<sup>+</sup>), with few canine  
270 hemangiosarcoma cells admixed in the population (**Figure S5C - F**). We were unable to  
271 definitively establish that these cells had undergone malignant transformation.

272

273 Three of four mice that received DHSA-1426 tumor fragments (1<sup>st</sup>-generation canine patient -  
274 derived xenograft or CPDX) formed apparent xenograft tumors in multiple organs including  
275 spleen, lymph nodes, meninges, cerebrum, and mesentery 12 weeks after implantation. However,

276 the cellular morphology of these tumors was consistent with that of round cell tumors (**Figure**  
277 **S6A and B**). We determined that the tumor cells expressed CD45 of mouse origin, B220, and  
278 Pax5, without expression of CD3, Ter-119, and MPO, indicating a mouse B-cell origin (**Figure**  
279 **S6C - H**). We verified the mouse origin using flow cytometry based on the tumor cells staining  
280 with an antibody directed against mouse CD45, but not with antibodies directed against canine  
281 CD45 and human  $\alpha V\beta_3$ -integrin, which cross reacts with canine, but not with mouse  $\alpha V\beta_3$ -  
282 integrin (**Figure S7**). These B-cells could be serially passaged, forming B-cell lymphomas in  
283 recipient BNX mice without the need for supporting canine hemangiosarcoma cells (**Figure**  
284 **S8A**). Intriguingly, we observed a similar result when we inoculated single cell suspensions  
285 derived from fresh tumor fragments of canine hemangiosarcoma xenografts into BNX recipients  
286 (2<sup>nd</sup> generation CPDX from a 1<sup>st</sup> generation cell line tumor). The resulting tumors had similar  
287 morphology and were also of mouse B-cell origin and could be serially passaged in BNX mice  
288 (**Figure S8B**).

289

### 290 **Canine hemangiosarcoma supports expansion and differentiation of CD34+ human** 291 **umbilical cord blood cells**

292 The potential etiology of these tumors was perplexing. We first examined whether the tumors  
293 might be caused by horizontal gene transfer. We used the method described above (in **Figure 3**  
294 and **Figure S4**) to identify species-specific transcripts.<sup>37</sup> Canine DHSA-1426 cells expressed  
295 only canine genes, whereas canine hemangiosarcoma xenograft tumors expressed a mixture of  
296 canine and mouse genes (**Figure S9**). In contrast, the genes expressed by the B-cell lymphomas  
297 arising from the hemangiosarcoma xenograft were almost exclusively of mouse origin.

298

299 Next, we sequenced viral RNA from the xenografts and used PathSeq platform to evaluate the  
300 potential for a transmissible, infectious agent as the cause of these tumors. Notably, no bacterial  
301 or viral sequences with tumorigenic potential were identified in the xenografts as well as in the  
302 primary or metastatic canine hemangiosarcoma tumor samples or cell lines. A recent study  
303 reported an association between *Bartonella spp* and canine hemangiosarcoma.<sup>38</sup> Ten of 24 dogs  
304 tested in our study had detectable *Bartonella spp* sequences, although these were present in low  
305 abundance (**Table S3**). Furthermore, four of the samples contained only sequences from *B.*  
306 *bacilliformis*, *B. grahamii*, or *B. tribocorum*, which infect humans and rats, respectively, and  
307 none of which is known to infect dogs as a primary or accidental host.<sup>39,40</sup> Three of the remaining  
308 six dogs had sequences for *B. clarridgeiae* and three had sequences for multiple *Bartonella spp.*,  
309 including the human and rodent-specific types. Together, the low abundance and the presence of  
310 sequences from organisms that do not infect dogs suggest that the *Bartonella spp.* sequences  
311 might have been contaminants.

312  
313 On the other hand, murine leukemia virus (MuLV) reads were reproducibly identified in the  
314 mouse B-cell lymphomas arising from the hemangiosarcoma xenografts (**Table S4**). The  
315 presence of MuLV sequences was further confirmed in one mouse B-cell lymphoma arising from  
316 the hemangiosarcoma xenografts and in two subcutaneous canine hemangiosarcoma xenograft  
317 tumors through independent viral RNA sequencing experiments. Moreover, MuLV sequences  
318 could be amplified by PCR from normal mouse tissues (liver and spleen), from each of three  
319 mouse B-cell lymphomas arising from the hemangiosarcoma xenografts, and from two  
320 subcutaneous canine hemangiosarcoma xenograft tumors. MuLV appears to be a promiscuous

321 virus, and we also found it in SB-HSA cells that had been previously passaged through mice as  
322 hemangiosarcomas.

323

324 These results suggested that MuLV might be the transforming agent giving rise to the mouse  
325 lymphomas, and pointed to a third possibility, that canine hemangiosarcoma cells were able to  
326 provide a suitable environment for expansion of these MuLV-transformed B-cells. We thus  
327 examined the potential for DHSA-1426 and EFB canine hemangiosarcoma cells to promote and  
328 maintain hematopoiesis in long-term culture initiating cell (LTC-IC) assays designed to promote  
329 expansion and differentiation of CD34<sup>+</sup> human umbilical cord blood hematopoietic progenitor  
330 cells (HPCs). Mouse M2-10B4 and human bone marrow derived mesenchymal stromal cells  
331 (MSCs) were used as positive controls, and HPCs cultured in the absence of feeder cells were  
332 used as a negative control. We found that DHSA-1426 cells promoted expansion of human  
333 CD34<sup>+</sup> HPCs with at least equal, if not better efficiency than conventional mouse or human  
334 feeder cells, and they achieved comparable proportions of hematopoietic cell differentiation *in*  
335 *vitro* across all cell lineages (**Figure 4 and Figure S10**). Similar results were obtained for EFB  
336 cells, although the expansion and differentiation were somewhat more limited.

337

338 **Canine hemangiosarcoma and human angiosarcoma establish transcriptional programs**  
339 **that support hematopoietic expansion and differentiation to create a tumor immune niche**

340 Finally, we evaluated whether hemangiosarcoma cells expressed genes that characterize distinct  
341 stromal cells in the bone marrow niche, including sinusoidal nestin<sup>+</sup> mesenchymal stromal cells,  
342 CXCL12-abundant reticular (CAR) cells, and sinusoidal leptin receptor (LeptinR)<sup>+</sup> stromal cells.  
343 **Figure 5 and Table S5** show that canine hemangiosarcoma tissues showed enrichment of genes

344 expressed by CAR cells, sinusoidal stromal cells, endosteal niche cells, endothelial progenitors,  
345 and hematopoietic progenitors. The tumors showed higher expression of cytokines such as *CSF3*,  
346 *IL6*, *IL11*, and *LIF*, associated with hematopoiesis and expansion of hematopoietic progenitors,  
347 whereas expression of *FLT3* and *IL7*, which are also involved in hematopoiesis and lymphoid  
348 homeostasis, were lower in hemangiosarcomas than the hematoma tissues. The tumors also  
349 showed down-regulation of genes associated with myeloid cells and macrophages. Next, we  
350 sought to determine if these gene signatures were also enriched in cultured hemangiosarcoma  
351 cells (cell lines) where the tumor microenvironmental factors were depleted. **Figure 6 and Table**  
352 **S6** show that hemangiosarcoma cells up-regulate some genes associated with endothelial  
353 progenitors and hematopoietic cytokines such as *PECAM1*, *TIE1*, *KDR*, *CD34*, *CSF3*, *IL6*, *IL11*,  
354 and *LIF in vitro*, with significant down-regulation of *NES*. Unlike hemangiosarcoma tissues, the  
355 hemangiosarcoma cell lines showed a higher level of genes expressed by myeloid cells and  
356 macrophage such as *CSF2RB*, *CSF1R* and *CD68*. DHSA-1426 and EFB cells in particular,  
357 showed remarkable enrichment of those genes, consistent with their documented capability to  
358 support hematopoietic expansion and differentiation (**Figure 4**).

359

## 360 **Discussion**

361 Vasoformative sarcomas are uniformly aggressive tumors with uncertain cellular origin. In  
362 humans, angiosarcomas are rare tumors that can arise idiopathically, or they can be secondary to  
363 genotoxic exposures from monomeric vinyl chloride, thorium, or radiation therapy.<sup>41,42</sup> In dogs,  
364 hemangiosarcomas are common and mostly idiopathic, although heritable risk factors might play  
365 a role.<sup>6,43</sup> These tumors are also seen in mice after exposure to certain genotoxic agents, as well  
366 as to non-genotoxic agents that cause severe tissue hypoxia,<sup>44,45</sup> and they are seen rarely in other



367 domestic and non-domestic species. The anatomical organization of these tumors across species  
368 is remarkably consistent. Angiosarcomas of humans and hemangiosarcomas of dogs have been  
369 proposed to arise from a multipotent bone marrow cell, possibly a hemangioblastic progenitor,  
370 while hemangiosarcomas of mice may arise from lineage committed endothelial progenitor  
371 cells.<sup>1-4,7</sup>

372  
373 Angiosarcomas of humans and hemangiosarcomas of dogs are chemoresponsive tumors, but for  
374 most human patients and for dogs, the benefits are transient and the prognosis for long-term  
375 survival is poor.<sup>46-48</sup> A better understanding of the cell of origin and the mutational spectrum for  
376 these tumors would help to inform the development of effective treatments for this group of  
377 diseases.

378  
379 We and others have reported on the mutational spectrum of human angiosarcomas and canine  
380 hemangiosarcomas.<sup>7,48-53</sup> Human angiosarcomas and canine hemangiosarcomas have a limited  
381 shared mutational spectrum, primarily in the canine visceral forms of the disease and in human  
382 breast angiosarcomas.<sup>50</sup> But the tumors in both species, as well as in zebrafish, seem to activate  
383 convergent transcriptional programs characterized by deregulation of phosphoinositide 3-kinase  
384 pathways.<sup>7,54</sup>

385  
386 Here, we document additional shared properties of human angiosarcoma and canine  
387 hemangiosarcoma. The transcriptional landscape of these vasoformative sarcomas is strongly  
388 pro-angiogenic; however, a subset of tumors from both species is characterized by the presence  
389 of robust transcriptional immune and inflammatory signatures, which are proportional to the

390 number of detectable T cells and macrophages. Our results also suggest that at least in dogs, the  
391 tumors with such signatures accounts for virtually all of the long-term survivors. Additional  
392 work will be necessary to establish if the different outcomes we observed in this cohort is  
393 generally representative of canine splenic hemangiosarcoma, where approximately 15% of dogs  
394 with localized or regional disease are expected to survive a year or longer when treated with the  
395 standard of care.<sup>55,56</sup> If this were the case, our work would provide the first potential set of  
396 biomarkers to inform personalized treatment strategies for this disease, with surgery and  
397 adjuvant cytotoxic chemotherapy providing adequate tumor control for some dogs with  
398 inflammatory hemangiosarcomas, but not for dogs with angiogenic hemangiosarcomas.  
399

400 The data from our canine hemangiosarcoma xenograft experiments confirm the notion that the  
401 chaotic vascular organization is driven by the tumor cells.<sup>1,21,24</sup> The experiments show that the  
402 tumor vessels are formed by a combination of malignant tumor cells and non-malignant host  
403 endothelial cells. This observation was unique to hemangiosarcoma among the three types of  
404 xenografts we examined, and it supports the capacity of hemangiosarcoma cells to adopt  
405 endothelial functions. In parallel, it suggests that normal (non-malignant) cells are necessary for  
406 the formation of malignant blood vessels in the vasculogenic tumors. Intriguingly, these  
407 experiments also show that the stromal contribution to the angiogenic and inflammatory  
408 transcriptional signatures is highly conserved in the xenografts, suggesting that the stromal cells  
409 in these tumors are heavily conditioned or reprogrammed by the malignant cells. Together, the  
410 results suggest that the interactions between the tumor and its microenvironment are rigorously  
411 orchestrated in the formation of the hemangiosarcoma niche, highlighting a potential point of  
412 vulnerability.

413

414 The development of exuberant myeloid and erythroid hyperplasia, as well as of bona fide  
415 lymphomas arising from mouse cells in animals with primary or secondary hemangiosarcoma  
416 xenografts was initially perplexing. Our results indicate that a transmissible etiology (from dog  
417 to mouse) is unlikely to be the cause of these expanded hematopoietic cell populations. Rather,  
418 the data indicate that at least a subset of canine hemangiosarcomas is capable of supporting  
419 robust expansion and differentiation of hematopoietic progenitor cells *in vitro*, and we interpret  
420 that this property is responsible for the expansion of myeloid cells *in vivo*, both in mice and in  
421 primary canine tumors. In the case of lymphomas, which occurred repeatedly and independently  
422 in animals receiving different tumor preparations, MuLV might have provided the driver events  
423 for transformation of residual lymphoid elements within a hyperproliferative environment  
424 created by the hemangiosarcoma cells. Our findings are also consistent with a report showing  
425 angiosarcoma in the bone marrow of a human patient with tumor-associated myeloid  
426 proliferation and extramedullary hematopoiesis.<sup>57</sup> The presence of transcriptional programs seen  
427 in hemangiosarcoma cells that resemble those of CAR cells, sinusoidal stromal cells, and  
428 endosteal niche cells, is consistent with this interpretation, and it increases the probability that  
429 canine hemangiosarcomas – and possibly human angiosarcomas – arise from one or more of  
430 these bone marrow nurse cells.

431

432 Other unexpected tumors have been reported in xenograft experiments and in pre-clinical models  
433 of stem cell transplantation. For instance, transplantation of murine MSCs has been reported to  
434 induce tumor formation and tissue malformation, potentially as a result of their possible genetic  
435 instability and/or cellular transformation.<sup>58-60</sup> It has also been reported that patient-derived

436 xenografts of human solid cancers including breast, colon, pancreatic cancer, and  
437 rhabdomyosarcoma induce lymphomagenesis or lymphocytic tumors in immunodeficient mice,  
438 but in these cases, the tumors were derived from human tumor-infiltrating lymphocytes  
439 transformed by Epstein-Barr virus.<sup>61-64</sup> These previously reported tumors were all of donor origin,  
440 while the tumors in our study originated from the mouse recipients and were distinct from the  
441 donor hemangiosarcomas. We were unable to identify and reports of hematopoietic tumors of  
442 recipient origin arising from xenotransplantation experiments using other types of canine cancers  
443 in the published literature, and we have not observed such an event in our own studies.<sup>37,65,66</sup>  
444 Thus, this finding appears to be unique to canine hemangiosarcoma, and may be due to the  
445 ability of hemangiosarcoma cells to support hematopoietic expansion. Our findings also suggest  
446 that the normal counterparts of canine hemangiosarcoma cells might contribute to the  
447 development of hematopoietic malignancies through the creation of a permissive niche.  
448 Additionally, transdifferentiation between lymphoma and sarcoma may occur through cellular  
449 reprogramming, potentially initiated by hematopoietic disruption.<sup>67</sup> In this light, it is especially  
450 interesting that a shared region of the canine genome was found to be significantly associated  
451 with B-cell lymphomas and hemangiosarcomas of golden retrievers.<sup>43</sup>  
452  
453 The capacity to create space for bone marrow transplants and adoptive cell therapies has taught  
454 us that the hematopoietic niche is resilient, and that bone marrow stromal cells are highly  
455 resistant to chemotherapy and radiation. These intrinsic properties could explain the relatively  
456 poor long-term responses of human patients with angiosarcoma and of dogs with  
457 hemangiosarcoma to cytotoxic therapies and may open the door to develop more effective  
458 treatments. Nevertheless, we must recognize that therapies targeting the hematopoietic niche

459 might themselves carry the potential for high toxicity.

460

461 Our data provide a new model to understand the etiology and cell of origin of canine

462 hemangiosarcomas and possibly human angiosarcomas. We propose that the malignant cells

463 originate from a bone marrow nurse cell, which has the potential to create a niche that favors

464 angiogenic proliferation or hematopoietic expansion, as illustrated by the models in **Figure 7**.

465 The robust inflammation observed in some of these tumors, then, may be intrinsic to the tumor,

466 and not simply due to extrinsic factors associated with tissue disruption. These paths of

467 differentiation may also control the biological behavior of the tumors, with those showing strong

468 angiogenic propensity also having the most aggressive behaviors.<sup>7</sup>

469

470 Finally, our data do not support a transmissible etiology for hemangiosarcoma, but they do

471 suggest that the permissive niche created by these cells can lead to the development of

472 hematopoietic tumors driven by leukemia viruses in mice, raising the possibility that the bone

473 marrow niche plays a similar role in viral lymphomas and leukemias of humans.

474

#### 475 **Acknowledgements**

476 The authors acknowledge Keumsoon Im for assistance with experiments and data acquisition.

477 The authors would also like to acknowledge Milcah Scott for processing the next generation

478 sequencing data and assistance with data analysis. Artistic design of Figures 2A and 7 was

479 created with Biorender (biorender.com). This work was partially supported by grants

480 1R03CA191713- 01 (to J.F. Modiano, A.L. Sarver, and J.H. Kim) from the NCI of the NIH,

481 grants #02759 (to J.H. Kim), #422 (to J.F. Modiano), and 1889-G (to J.F. Modiano, M.Breen,

482 and K. Lindblad-Toh) from the AKC Canine Health Foundation, grant JHK15MN-004 (to J.H.  
483 Kim) from the National Canine Cancer Foundation, grant D10-501 (to J.F. Modiano and K.  
484 Lindblad-Toh) from Morris Animal Foundation, and a grant from Swedish Cancerfonden (to K.  
485 Lindblad-Toh). This work was also supported by an NIH NCI R50 grant, CA211249 (to A.L.  
486 Sarver). The NIH Comprehensive Cancer Center Support Grant to the Masonic Cancer Center,  
487 University of Minnesota (P30 CA077598) provided support for the cytogenetic analyses  
488 performed in the Cytogenomics Shared Resource. M. Breen is supported in part by the Oscar J.  
489 Fletcher Distinguished Professorship in Comparative Oncology Genetics at North Carolina State  
490 University. K. Lindblad-Toh is supported by a Distinguished Professor award from the Swedish  
491 Research Council. J.F. Modiano is supported by the Alvin and June Perlman Chair in Animal  
492 Oncology. The authors gratefully acknowledge donations to the Animal Cancer Care and  
493 Research Program of the University of Minnesota that helped support this project. The content of  
494 this manuscript is solely the responsibility of the authors and does not necessarily represent the  
495 official views of any of the funding agencies listed above.

496

#### 497 **Authorship Contributions**

498 J.H.K., and J.F.M conceptualized the study, designed experiments, and supervised the project.  
499 J.H.K., A.L.S., N.C., J.A., M.B., and K.L.T. analyzed RNA-seq data and provided computational  
500 methodology. S.B., C.S.P., and M.M ran PathSeq algorithms and analyzed data. S.K., and  
501 S.M.G. performed PCR experiment from viral RNA and analyzed MiSeq data. M.M., and M.B.  
502 contributed to analysis and interpretation of PathSeq and MiSeq data. J.H.K, A.J.S., and A.M.F.  
503 performed mouse experiments. M.G.A., T.C.L., D.S.K. performed LTC-IC and CFU assays and  
504 analyzed data. A.J.S. performed flow cytometrical analysis. C.L.F. generated histological

505 samples and performed IHC. A.J.S., and M.L. provided administrative, technical, and material  
506 support. J.H.K., I.C., T.D.O., and M.G.O. performed histopathological review and scoring  
507 analysis. L.O. conducted FISH experiments. J.H.K., A.J.S., A.L.S., E.B.D., and J.F.M. wrote,  
508 reviewed, and revised the manuscript with help from all authors. All authors read the manuscript  
509 and approved the final draft.

510

#### 511 **Disclosure of Conflicts of Interest**

512 No potential conflicts of interest were disclosed.

513

#### 514 **References**

- 515 1. Fosmire SP, Dickerson EB, Scott AM, et al. Canine malignant hemangiosarcoma as a model  
516 of primitive angiogenic endothelium. *Lab Invest.* 2004;84(5):562-572.
- 517 2. Lamerato-Kozicki AR, Helm KM, Jubala CM, Cutter GC, Modiano JF. Canine  
518 hemangiosarcoma originates from hematopoietic precursors with potential for endothelial  
519 differentiation. *Exp Hematol.* 2006;34(7):870-878.
- 520 3. Liu L, Kakiuchi-Kiyota S, Arnold LL, Johansson SL, Wert D, Cohen SM. Pathogenesis of  
521 human hemangiosarcomas and hemangiomas. *Hum Pathol.* 2013;44(10):2302-2311.
- 522 4. Gorden BH, Kim JH, Sarver AL, et al. Identification of three molecular and functional  
523 subtypes in canine hemangiosarcoma through gene expression profiling and progenitor cell  
524 characterization. *Am J Pathol.* 2014;184(4):985-995.
- 525 5. Italiano A, Thomas R, Breen M, et al. The miR-17-92 cluster and its target THBS1 are  
526 differentially expressed in angiosarcomas dependent on MYC amplification. *Genes*  
527 *Chromosomes Cancer.* 2012;51(6):569-578.

- 528 6. Kim J-H, Graef A, Dickerson E, Modiano J. Pathobiology of Hemangiosarcoma in Dogs:  
529 Research Advances and Future Perspectives. *Vet Sci.* 2015;2(4):388.
- 530 7. Kim JH, Megquier K, Thomas R, et al. Genomically Complex Human Angiosarcoma and  
531 Canine Hemangiosarcoma Establish Convergent Angiogenic Transcriptional Programs  
532 Driven by Novel Gene Fusions. *Mol Cancer Res.* 2021;19(5):847-861.
- 533 8. Tamburini BA, Phang TL, Fosmire SP, et al. Gene expression profiling identifies  
534 inflammation and angiogenesis as distinguishing features of canine hemangiosarcoma. *BMC*  
535 *Cancer.* 2010;10:619.
- 536 9. Quail DF, Joyce JA. Microenvironmental regulation of tumor progression and metastasis.  
537 *Nat Med.* 2013;19(11):1423-1437.
- 538 10. Colmone A, Amorim M, Pontier AL, Wang S, Jablonski E, Sipkins DA. Leukemic cells  
539 create bone marrow niches that disrupt the behavior of normal hematopoietic progenitor  
540 cells. *Science.* 2008;322(5909):1861-1865.
- 541 11. Schreiber RD, Old LJ, Smyth MJ. Cancer immunoediting: integrating immunity's roles in  
542 cancer suppression and promotion. *Science.* 2011;331(6024):1565-1570.
- 543 12. Lane SW, Scadden DT, Gilliland DG. The leukemic stem cell niche: current concepts and  
544 therapeutic opportunities. *Blood.* 2009;114(6):1150-1157.
- 545 13. Charles N, Ozawa T, Squatrito M, et al. Perivascular nitric oxide activates notch signaling  
546 and promotes stem-like character in PDGF-induced glioma cells. *Cell Stem Cell.*  
547 2010;6(2):141-152.
- 548 14. Vermeulen L, De Sousa EMF, van der Heijden M, et al. Wnt activity defines colon cancer  
549 stem cells and is regulated by the microenvironment. *Nat Cell Biol.* 2010;12(5):468-476.



- 550 15. Adams GB, Scadden DT. The hematopoietic stem cell in its place. *Nat Immunol.*  
551 2006;7(4):333-337.
- 552 16. de Haan G, Lazare SS. Aging of hematopoietic stem cells. *Blood.* 2018;131(5):479-487.
- 553 17. Filippi MD, Ghaffari S. Mitochondria in the maintenance of hematopoietic stem cells: new  
554 perspectives and opportunities. *Blood.* 2019;133(18):1943-1952.
- 555 18. Wu JY, Purton LE, Rodda SJ, et al. Osteoblastic regulation of B lymphopoiesis is mediated  
556 by Gs{alpha}-dependent signaling pathways. *Proc Natl Acad Sci U S A.*  
557 2008;105(44):16976-16981.
- 558 19. Raaijmakers MH, Mukherjee S, Guo S, et al. Bone progenitor dysfunction induces  
559 myelodysplasia and secondary leukaemia. *Nature.* 2010;464(7290):852-857.
- 560 20. Kode A, Manavalan JS, Mosialou I, et al. Leukaemogenesis induced by an activating beta-  
561 catenin mutation in osteoblasts. *Nature.* 2014;506(7487):240-244.
- 562 21. Akhtar N, Padilla ML, Dickerson EB, et al. Interleukin-12 inhibits tumor growth in a novel  
563 angiogenesis canine hemangiosarcoma xenograft model. *Neoplasia.* 2004;6(2):106-116.
- 564 22. Tamburini BA, Trapp S, Phang TL, Schappa JT, Hunter LE, Modiano JF. Gene expression  
565 profiles of sporadic canine hemangiosarcoma are uniquely associated with breed. *PLoS One.*  
566 2009;4(5):e5549.
- 567 23. Gorden BH, Kim JH, Sarver AL, et al. Identification of Three Molecular and Functional  
568 Subtypes in Canine Hemangiosarcoma through Gene Expression Profiling and Progenitor  
569 Cell Characterization. *Am J Pathol.* 2014;184(4):985-995.
- 570 24. Kim JH, Frantz AM, Anderson KL, et al. Interleukin-8 promotes canine hemangiosarcoma  
571 growth by regulating the tumor microenvironment. *Exp Cell Res.* 2014;323(1):155-164.

- 572 25. Hicok KC, Thomas T, Gori F, Rickard DJ, Spelsberg TC, Riggs BL. Development and  
573 characterization of conditionally immortalized osteoblast precursor cell lines from human  
574 bone marrow stroma. *J Bone Miner Res.* 1998;13(2):205-217.
- 575 26. Kopher RA, Penchev VR, Islam MS, Hill KL, Khosla S, Kaufman DS. Human embryonic  
576 stem cell-derived CD34+ cells function as MSC progenitor cells. *Bone.* 2010;47(4):718-728.
- 577 27. Zou L, Kidwai FK, Kopher RA, et al. Use of RUNX2 expression to identify osteogenic  
578 progenitor cells derived from human embryonic stem cells. *Stem Cell Reports.*  
579 2015;4(2):190-198.
- 580 28. Zou L, Chen Q, Quanbeck Z, Bechtold JE, Kaufman DS. Angiogenic activity mediates bone  
581 repair from human pluripotent stem cell-derived osteogenic cells. *Sci Rep.* 2016;6:22868.
- 582 29. Ferrell PI, Hexum MK, Kopher RA, Lepley MA, Gussiaas A, Kaufman DS. Functional  
583 assessment of hematopoietic niche cells derived from human embryonic stem cells. *Stem*  
584 *Cells Dev.* 2014;23(12):1355-1363.
- 585 30. Ronald L. Wasserstein, Lazar NA. The ASA's Statement on p-Values: Context, Process, and  
586 Purpose. *The American Statistician.* 2016;70(2):129-133.
- 587 31. Antonescu CR, Yoshida A, Guo T, et al. KDR activating mutations in human angiosarcomas  
588 are sensitive to specific kinase inhibitors. *Cancer Res.* 2009;69(18):7175-7179.
- 589 32. Antonescu C. Malignant vascular tumors--an update. *Mod Pathol.* 2014;27 Suppl 1:S30-38.
- 590 33. Scott MC, Sarver AL, Gavin KJ, et al. Molecular subtypes of osteosarcoma identified by  
591 reducing tumor heterogeneity through an interspecies comparative approach. *Bone.*  
592 2011;49(3):356-367.

- 593 34. Kodama A, Sakai H, Matsuura S, et al. Establishment of canine hemangiosarcoma xenograft  
594 models expressing endothelial growth factors, their receptors, and angiogenesis-associated  
595 homeobox genes. *BMC Cancer*. 2009;9:363.
- 596 35. Murai A, Asa SA, Kodama A, Hirata A, Yanai T, Sakai H. Constitutive phosphorylation of  
597 the mTORC2/Akt/4E-BP1 pathway in newly derived canine hemangiosarcoma cell lines.  
598 *BMC Vet Res*. 2012;8:128.
- 599 36. Andersen NJ, Nickoloff BJ, Dykema KJ, et al. Pharmacologic inhibition of MEK signaling  
600 prevents growth of canine hemangiosarcoma. *Mol Cancer Ther*. 2013;12(9):1701-1714.
- 601 37. Scott MC, Tomiyasu H, Garbe JR, et al. Heterotypic mouse models of canine osteosarcoma  
602 recapitulate tumor heterogeneity and biological behavior. *Dis Model Mech*. 2016;9(12):1435-  
603 1444.
- 604 38. Lashnits E, Neupane P, Bradley JM, et al. Molecular prevalence of Bartonella, Babesia, and  
605 hemotropic Mycoplasma species in dogs with hemangiosarcoma from across the United  
606 States. *PLoS One*. 2020;15(1):e0227234.
- 607 39. Chomel BB, Boulouis HJ, Maruyama S, Breitschwerdt EB. Bartonella spp. in pets and effect  
608 on human health. *Emerg Infect Dis*. 2006;12(3):389-394.
- 609 40. Engel P, Dehio C. Genomics of host-restricted pathogens of the genus bartonella. *Genome*  
610 *Dyn*. 2009;6:158-169.
- 611 41. Fayette J, Martin E, Piperno-Neumann S, et al. Angiosarcomas, a heterogeneous group of  
612 sarcomas with specific behavior depending on primary site: a retrospective study of 161  
613 cases. *Ann Oncol*. 2007;18(12):2030-2036.
- 614 42. Young RJ, Brown NJ, Reed MW, Hughes D, Woll PJ. Angiosarcoma. *Lancet Oncol*.  
615 2010;11(10):983-991.

- 616 43. Tonomura N, Elvers I, Thomas R, et al. Genome-wide association study identifies shared risk  
617 loci common to two malignancies in golden retrievers. *PLoS Genet.* 2015;11(2):e1004922.
- 618 44. Cohen SM, Storer RD, Criswell KA, et al. Hemangiosarcoma in rodents: mode-of-action  
619 evaluation and human relevance. *Toxicol Sci.* 2009;111(1):4-18.
- 620 45. Kakiuchi-Kiyota S, Vetro JA, Suzuki S, et al. Effects of the PPARgamma agonist  
621 troglitazone on endothelial cells in vivo and in vitro: differences between human and mouse.  
622 *Toxicol Appl Pharmacol.* 2009;237(1):83-90.
- 623 46. Clifford CA, Mackin AJ, Henry CJ. Treatment of canine hemangiosarcoma: 2000 and  
624 beyond. *J Vet Intern Med.* 2000;14(5):479-485.
- 625 47. Mullin C, Clifford CA. Histiocytic Sarcoma and Hemangiosarcoma Update. *Vet Clin North*  
626 *Am Small Anim Pract.* 2019;49(5):855-879.
- 627 48. Painter CA, Jain E, Tomson BN, et al. The Angiosarcoma Project: enabling genomic and  
628 clinical discoveries in a rare cancer through patient-partnered research. *Nat Med.*  
629 2020;26(2):181-187.
- 630 49. Wang G, Wu M, Maloneyhuss MA, et al. Actionable mutations in canine hemangiosarcoma.  
631 *PLoS One.* 2017;12(11):e0188667.
- 632 50. Megquier K, Turner-Maier J, Swofford R, et al. Comparative Genomics Reveals Shared  
633 Mutational Landscape in Canine Hemangiosarcoma and Human Angiosarcoma. *Mol Cancer*  
634 *Res.* 2019;17(12):2410-2421.
- 635 51. Wang G, Wu M, Durham AC, et al. Molecular subtypes in canine hemangiosarcoma reveal  
636 similarities with human angiosarcoma. *PLoS One.* 2020;15(3):e0229728.

- 637 52. Beca F, Krings G, Chen YY, et al. Primary mammary angiosarcomas harbor frequent  
638 mutations in KDR and PIK3CA and show evidence of distinct pathogenesis. *Mod Pathol.*  
639 2020;33(8):1518-1526.
- 640 53. Chan JY, Lim JQ, Yeong J, et al. Multiomic analysis and immunoprofiling reveal distinct  
641 subtypes of human angiosarcoma. *J Clin Invest.* 2020;130(11):5833-5846.
- 642 54. Choorapoikayil S, Weijts B, Kers R, de Bruin A, den Hertog J. Loss of Pten promotes  
643 angiogenesis and enhanced vegfaa expression in zebrafish. *Dis Model Mech.* 2013;6(5):1159-  
644 1166.
- 645 55. Borgatti A, Koopmeiners JS, Sarver AL, et al. Safe and Effective Sarcoma Therapy through  
646 Bispecific Targeting of EGFR and uPAR. *Mol Cancer Ther.* 2017;16(5):956-965.
- 647 56. Borgatti A, Fieberg A, Winter AL, et al. Impact of repeated cycles of EGF bispecific  
648 angiotoxin (eBAT) administered at a reduced interval from doxorubicin chemotherapy in  
649 dogs with splenic haemangiosarcoma. *Vet Comp Oncol.* 2020;18(4):664-674.
- 650 57. Xie W, Lin P, Konoplev S. An unexpected diagnosis: angiosarcoma with bone marrow  
651 involvement mimicking a myeloproliferative neoplasm. *Br J Haematol.* 2019;184(4):495.
- 652 58. Miura M, Miura Y, Padilla-Nash HM, et al. Accumulated chromosomal instability in murine  
653 bone marrow mesenchymal stem cells leads to malignant transformation. *Stem Cells.*  
654 2006;24(4):1095-1103.
- 655 59. Foudah D, Redaelli S, Donzelli E, et al. Monitoring the genomic stability of in vitro cultured  
656 rat bone-marrow-derived mesenchymal stem cells. *Chromosome Res.* 2009;17(8):1025-1039.
- 657 60. Jeong JO, Han JW, Kim JM, et al. Malignant tumor formation after transplantation of short-  
658 term cultured bone marrow mesenchymal stem cells in experimental myocardial infarction  
659 and diabetic neuropathy. *Circ Res.* 2011;108(11):1340-1347.

- 660 61. Chen K, Ahmed S, Adeyi O, Dick JE, Ghanekar A. Human solid tumor xenografts in  
661 immunodeficient mice are vulnerable to lymphomagenesis associated with Epstein-Barr  
662 virus. *PLoS One*. 2012;7(6):e39294.
- 663 62. Fujii E, Kato A, Chen YJ, Matsubara K, Ohnishi Y, Suzuki M. Characterization of EBV-  
664 related lymphoproliferative lesions arising in donor lymphocytes of transplanted human  
665 tumor tissues in the NOG mouse. *Exp Anim*. 2014;63(3):289-296.
- 666 63. Bondarenko G, Ugolkov A, Rohan S, et al. Patient-Derived Tumor Xenografts Are  
667 Susceptible to Formation of Human Lymphocytic Tumors. *Neoplasia*. 2015;17(9):735-741.
- 668 64. Tillman H, Vogel P, Rogers T, Akers W, Rehg JE. Spectrum of Posttransplant  
669 Lymphoproliferations in NSG Mice and Their Association With EBV Infection After  
670 Engraftment of Pediatric Solid Tumors. *Vet Pathol*. 2020;57(3):445-456.
- 671 65. Weiskopf K, Anderson KL, Ito D, et al. Eradication of Canine Diffuse Large B-Cell  
672 Lymphoma in a Murine Xenograft Model with CD47 Blockade and Anti-CD20. *Cancer*  
673 *Immunol Res*. 2016;4(12):1072-1087.
- 674 66. Ito D, Endicott MM, Jubala CM, et al. A tumor-related lymphoid progenitor population  
675 supports hierarchical tumor organization in canine B-cell lymphoma. *J Vet Intern Med*.  
676 2011;25(4):890-896.
- 677 67. Zhang Q, Orlando EJ, Wang HY, et al. Transdifferentiation of lymphoma into sarcoma  
678 associated with profound reprogramming of the epigenome. *Blood*. 2020;136(17):1980-1983.

679

680

681

682

683

684

685

686 **Figure legends**

687 **Figure 1. Immune cell infiltration and comparative immune signatures between canine**

688 **hemangiosarcoma and human angiosarcoma. (A and B)** Representative photomicrographs of

689 H&E and immunohistochemical staining showing histological morphology and immune cell

690 infiltration in canine hemangiosarcoma (A) and human angiosarcoma tissues (B) using anti-CD3,

691 anti-PAX5, anti-MAC387, and anti-Iba1 (for canine) or anti-CD163 (for human) antibodies for

692 detecting T cell, B cell, and macrophages. H&E = hematoxylin and eosin. Horseradish

693 peroxidase or alkaline phosphate (for Iba1) conjugates were used. Counterstain = hematoxylin.

694 Bar = 100 um. (C and D) Scatter plots display correlation between transcriptional and

695 immunohistochemical immune score in canine hemangiosarcoma (C) and human angiosarcoma

696 (D). Spearman's correlation coefficient (R) was calculated. (E) 461 upregulated genes were

697 identified in immune-high (N = 8) compared to immune-low (N = 5) groups in human

698 angiosarcomas (FDR P value < 0.05). (F) 567 immune gene signatures were identified among

699 three molecular subtypes of canine hemangiosarcomas (N = 76; FDR P value < 0.001; fold

700 change > 3). The heatmaps show up-regulated (red) and down-regulated (green) genes by

701 unsupervised hierarchical clustering (average linkage; mean-centered; log<sup>2</sup> transformed). (G)

702 Venn diagram shows 58 common genes associated with signaling pathways of immune cell

703 functions between human and canine tumors.

704

705 **Figure 2. Establishment of xenografts derived from canine hemangiosarcoma in**

706 **immunodeficient mice.** (A) Schematic illustration depicts process of tumor xenografts in beige-  
707 nude-xid (BNX) mice. (B) DHSA-1426 hemangiosarcoma cells were established from canine  
708 patient-derived tumor fragments. DHSA-1426 cells formed tumors histologically classified as  
709 hemangiosarcoma. Left panel: H&E stain was done in xenograft tumor tissue. Right panel:  
710 Immunohistochemistry was performed for detection of CD31 protein (alkaline phosphatase  
711 conjugates; counterstain = hematoxylin). Top panel: 100X magnification (Bar = 100 um);  
712 Bottom panel: 200X magnification (Bar = 50 um).

713

714 **Figure 3. Organization of tumor and stromal cells in mouse xenografts of canine**

715 **hemangiosarcoma, osteosarcoma, and lymphoma.** (A) Fluorescence *in situ* hybridization  
716 images using canine-specific (*IL8*, red) and mouse-specific (X chromosome, green) probes in a  
717 canine hemangiosarcoma (HSA) xenograft, a canine osteosarcoma (OS) xenograft, and a canine  
718 lymphoma xenograft transplanted into receptive immunodeficient female mouse hosts. Red and  
719 green arrows point to representative xenograft canine tumor cells and mouse stromal cells,  
720 respectively, to aid in identification. (B) Schematic representation of A, illustrating the  
721 organization of HSA, OS, and lymphoma xenografts. (C) Individual points on graph represent  
722 relative quantity of donor (dog) and host (mouse) cells in each tumor type. 10-12 fields of  
723 pictures at high magnification (400X) per slide were acquired. A total of approximately 1,000  
724 cells in individual xenograft tumor was counted, and the percentages for each species-cells are  
725 presented.

726

727 **Figure 4. Canine hemangiosarcoma cells support expansion and differentiation of CD34+**

728 **human umbilical cord blood (hUCB) cells.** (A) Flow cytometric data show populations of cells



729 expressing CD43 and CD45 differentiated from CD34+ hUCB cells. CD34+ hUCB cells were  
730 pooled from two patients. M2-10B4, hBM-MSCs, and canine HSA cells (DHSA-1426 and EFB)  
731 were seeded on gelatin-coated 24-well plates at a density of  $1 \times 10^5$  cells/well. Gelatin-coated  
732 wells without stroma served as a negative control. Surface antigens of CD34, CD43, and CD45  
733 were analyzed at week 5. **(B and C)** Bar graphs show number of different colonies formed by  
734 hUCB CD34+ cells co-cultured with feeder cells. Both DHSA-1426 and EFB canine  
735 hemangiosarcoma cell lines expanded hUCB CD34+ cells similar to the M2-10B4 and hBM-  
736 MSC positive control lines, while gelatin-coated wells alone failed to support expansion. Burst-  
737 forming unit-erythroid (BFU-E), CFU-Erythroid (CFU-E), CFU-Granulocyte/Macrophage  
738 (CFU-GM), CFU-Macrophage (CFU-M), and CFU-  
739 Granulocyte/Erythroid/Macrophage/Megakaryocyte (CFU-GEMM) were determined for colony-  
740 forming unit assay.

741  
742 **Figure 5. Gene expression signature of hematopoietic and immune cell function enriched in**  
743 **hemangiosarcoma tissues.** Bar graphs show representative gene signature enrichment  
744 associated with bone marrow niche cells, endothelial and hematopoietic progenitor, myeloid and  
745 macrophage, signaling network, and hematopoietic cytokines between hemangiosarcoma (N =  
746 76) and hematoma tissues (N = 10). Expression values represent count per million reads  
747 calculated by RNA-seq transcriptomic data. CAR = CXC chemokine ligand 12 (CXCL12)-  
748 abundant reticular; MSC = mesenchymal stromal cell; LepR = Leptin Receptor. P values and  
749 statistical significance were determined by Mann-Whitney U test. \*, P < 0.05; \*\*, P < 0.01; \*\*\*,  
750 P < 0.001; \*\*\*\*, P < 0.0001.

751

752 **Figure 6. Gene expression signature of hematopoietic and immune cell function enriched in**  
753 **hemangiosarcoma cells.** Bar graphs representative gene expression associated with bone  
754 marrow niche cells, endothelial and hematopoietic progenitor, myeloid and macrophage,  
755 signaling network, and hematopoietic cytokines between hemangiosarcoma cell lines (N = 11)  
756 and hematoma cells (N = 4). Expression value represents count per million reads calculated by  
757 RNA-seq transcriptomic data. CAR = CXC chemokine ligand 12 (CXCL12)-abundant reticular;  
758 MSC = mesenchymal stromal cell; LepR = Leptin Receptor. P values and statistical significance  
759 were determined by Mann-Whitney U test. \*, P <0.05; \*\*, P < 0.01; \*\*\*, P < 0.001; \*\*\*\*, P <  
760 0.0001.

761  
762 **Figure 7. Hypothetical models for establishment of distinct molecular phenotypes of canine**  
763 **hemangiosarcoma.** Non-mutually exclusive models illustrate discreet cells of origin for distinct  
764 molecular subtypes of hemangiosarcoma. Hemangiosarcoma may progress from bone marrow  
765 nurse cells that create a niche for hematopoietic expansion and inflammation, to a transitional  
766 pro-angiogenic state and full progression to a pure angiogenic state, or to malignant  
767 transformation with an inflammatory phenotype.

# Figure 1

## A Canine

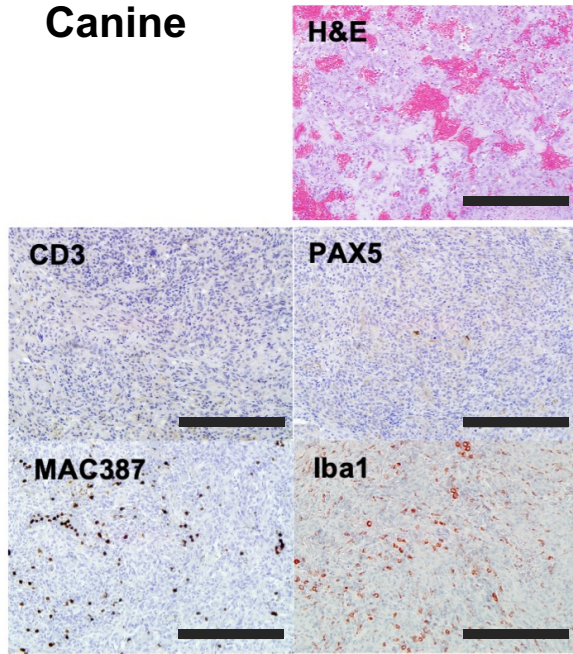

## B Human

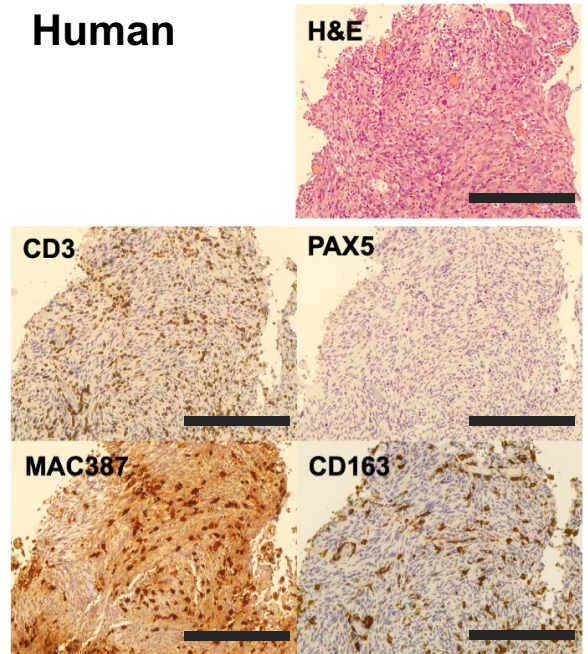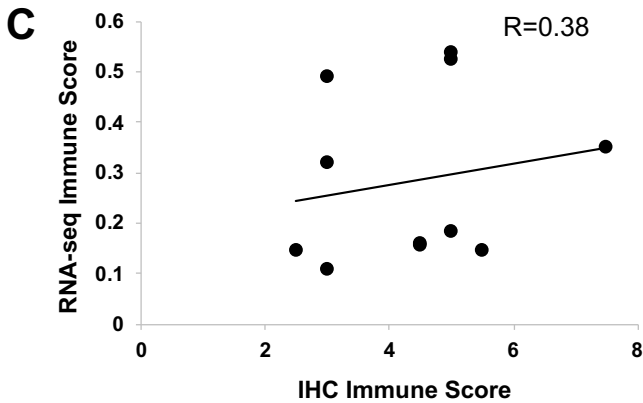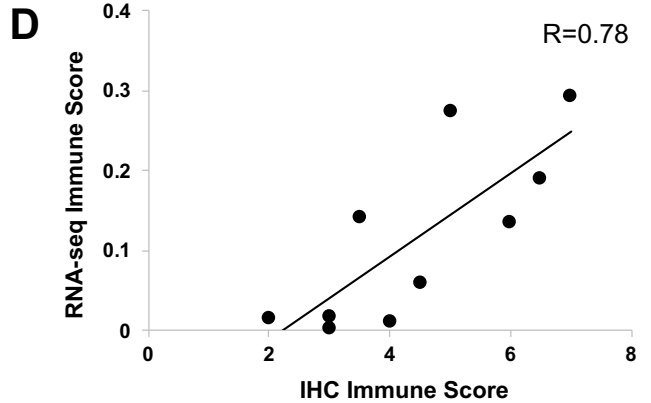

## E Human

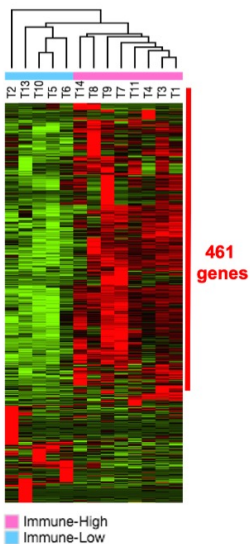

## F Canine

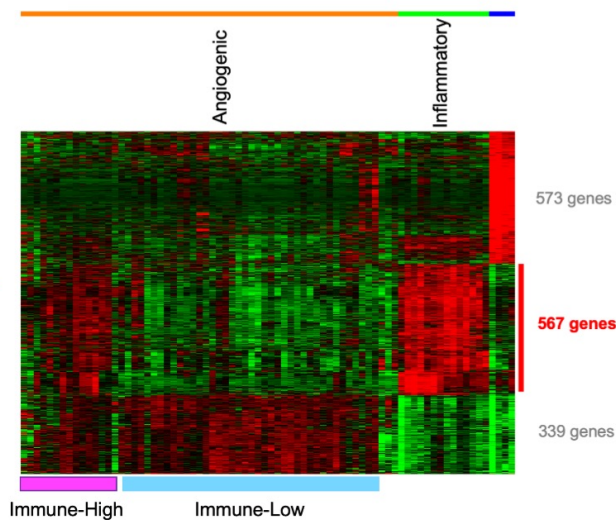

## G

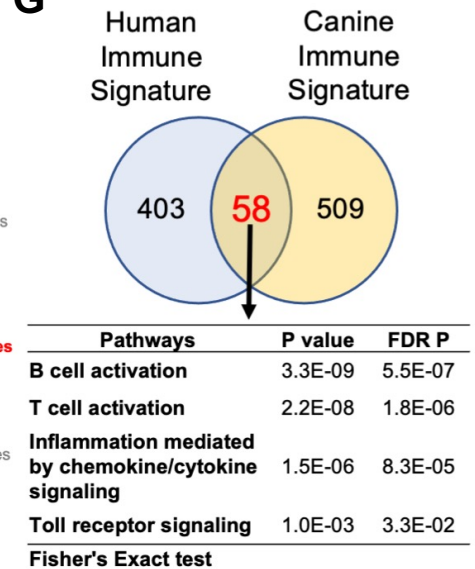

**Figure 2**

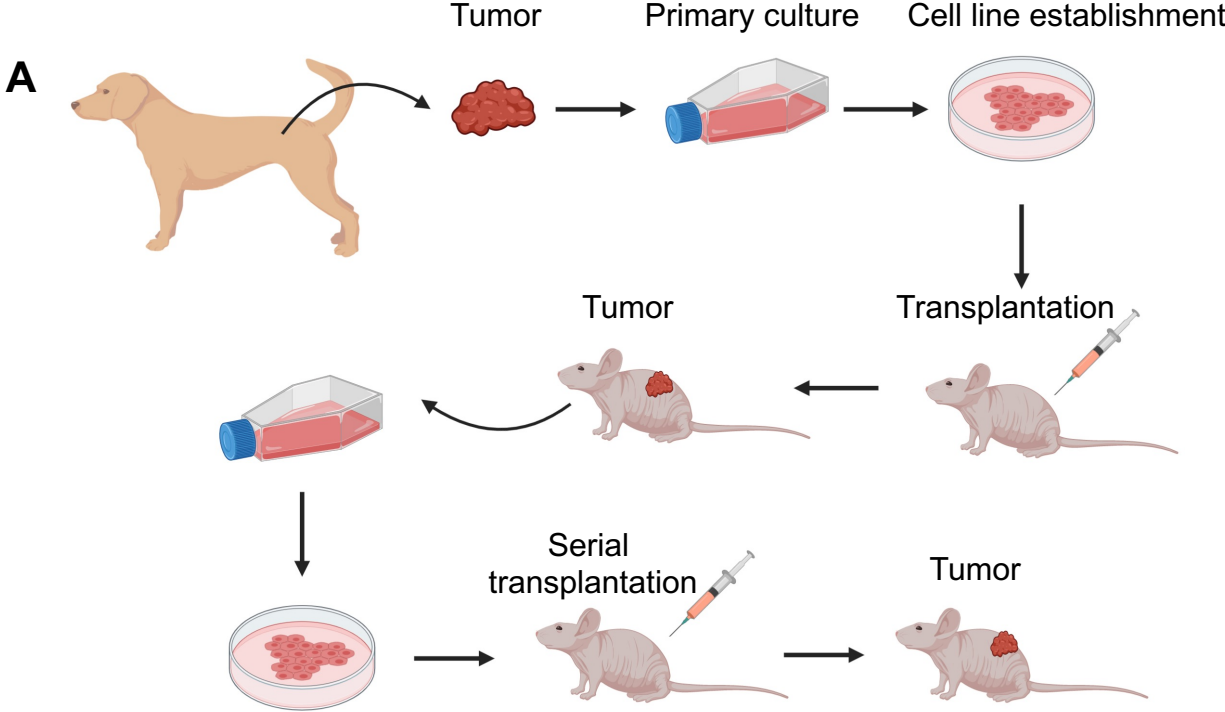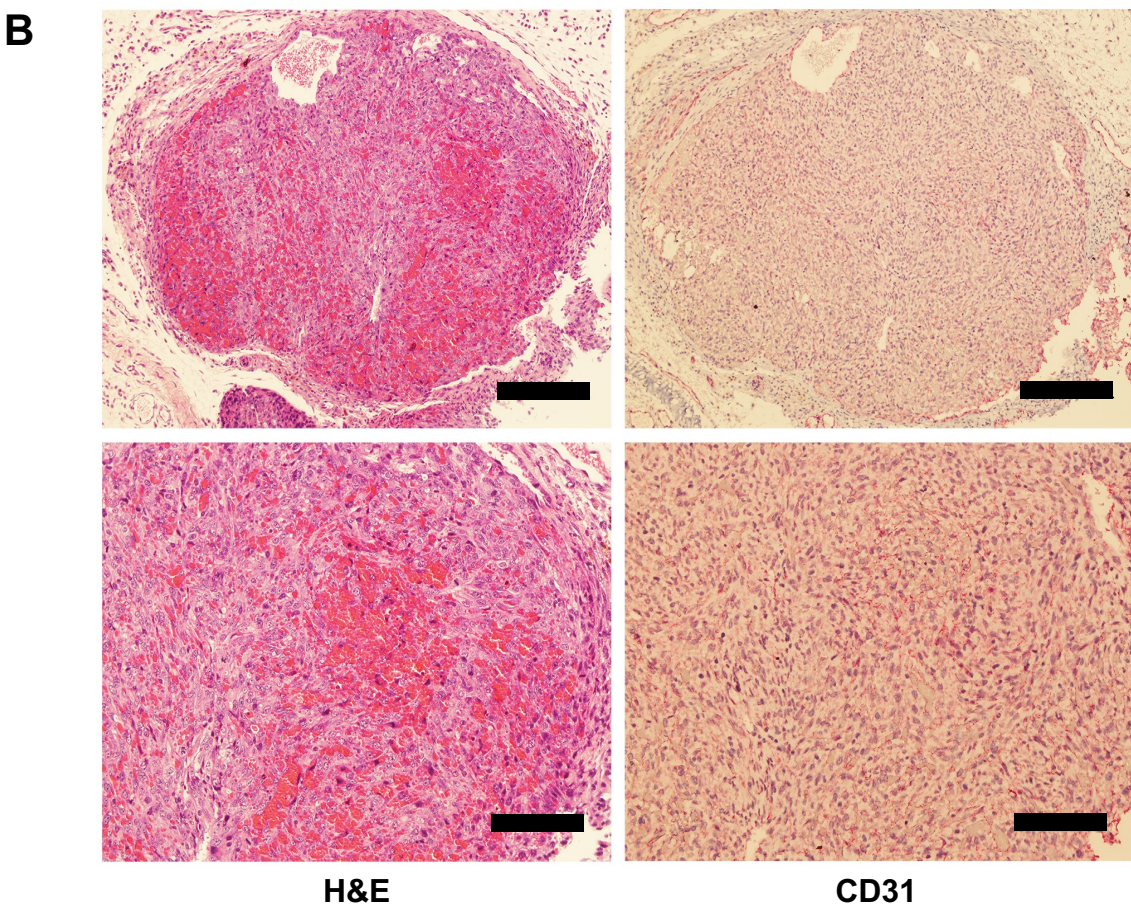

Figure 3

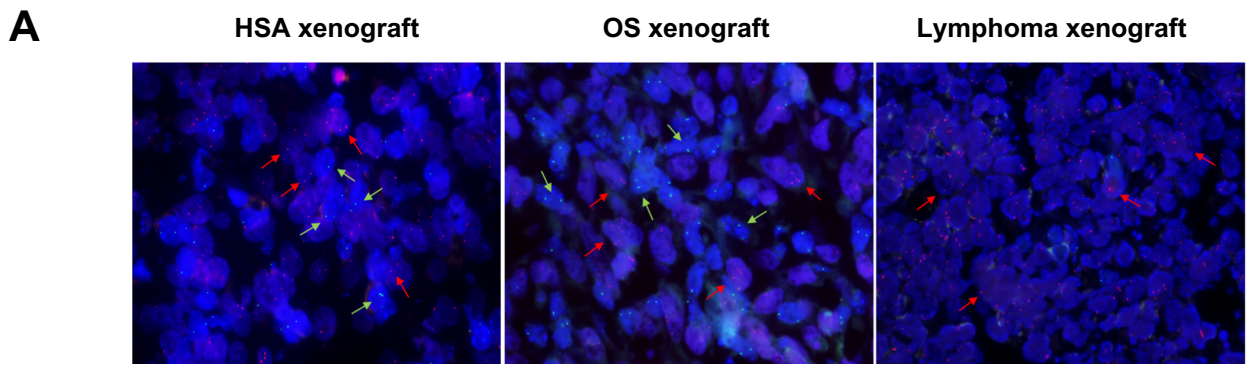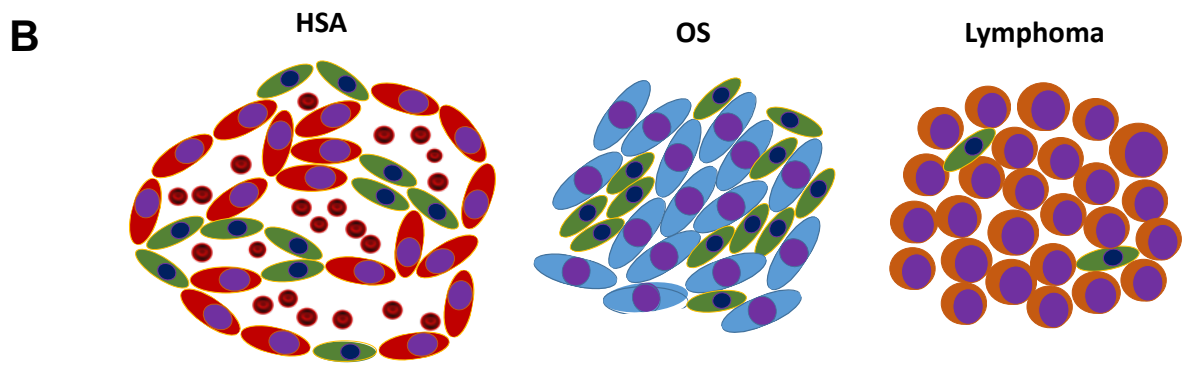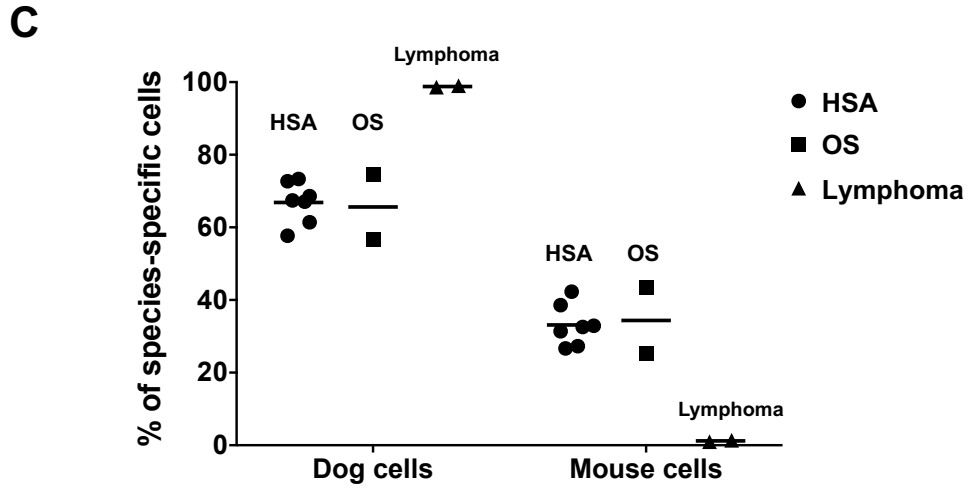

**Figure 4**

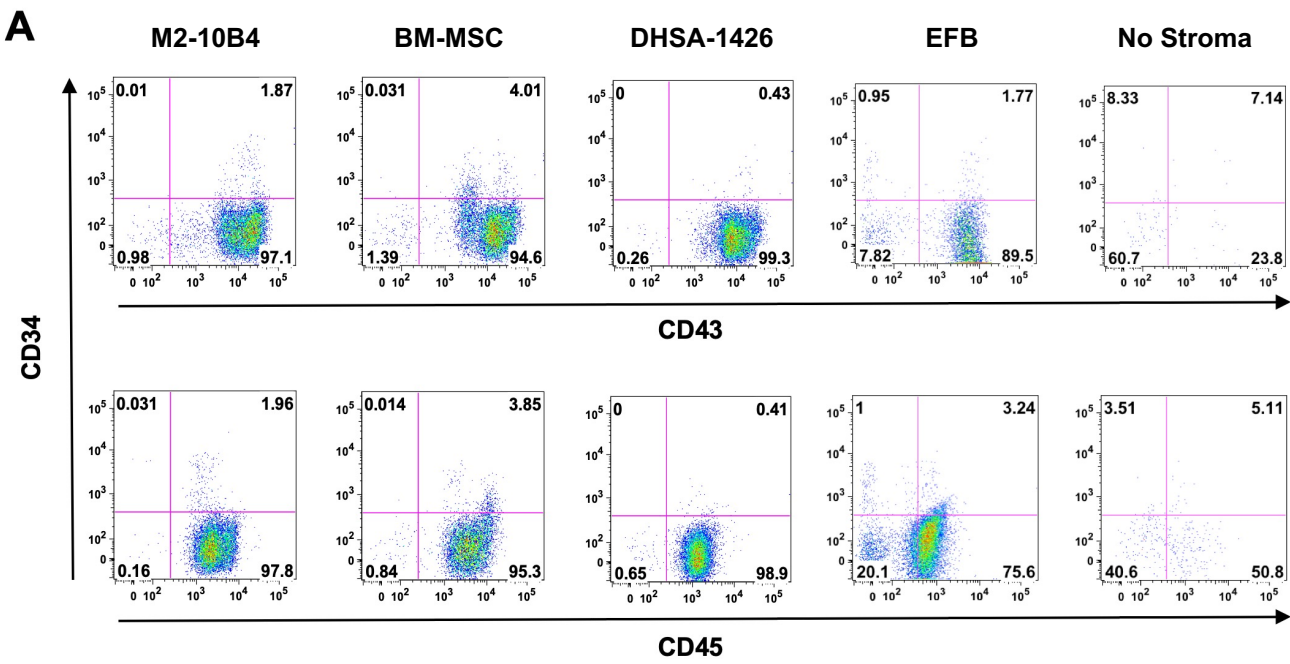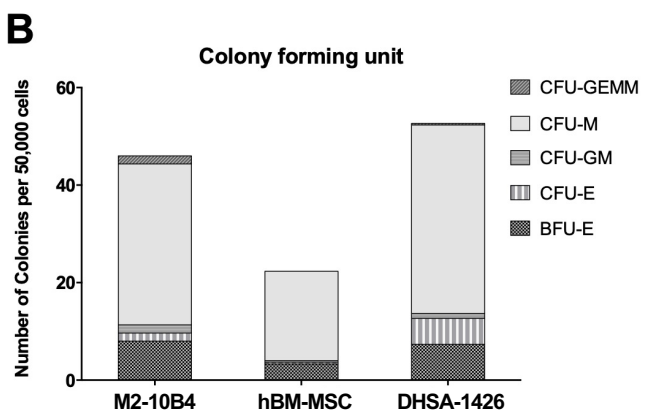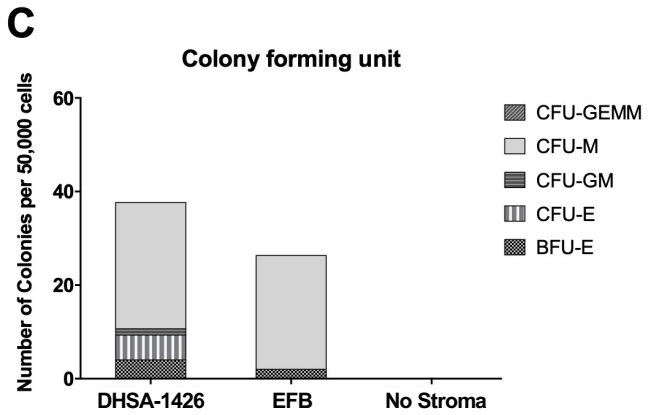

**Figure 5**

█ HSA (N=76)  
█ Hematoma (N=10)

**Tissues**

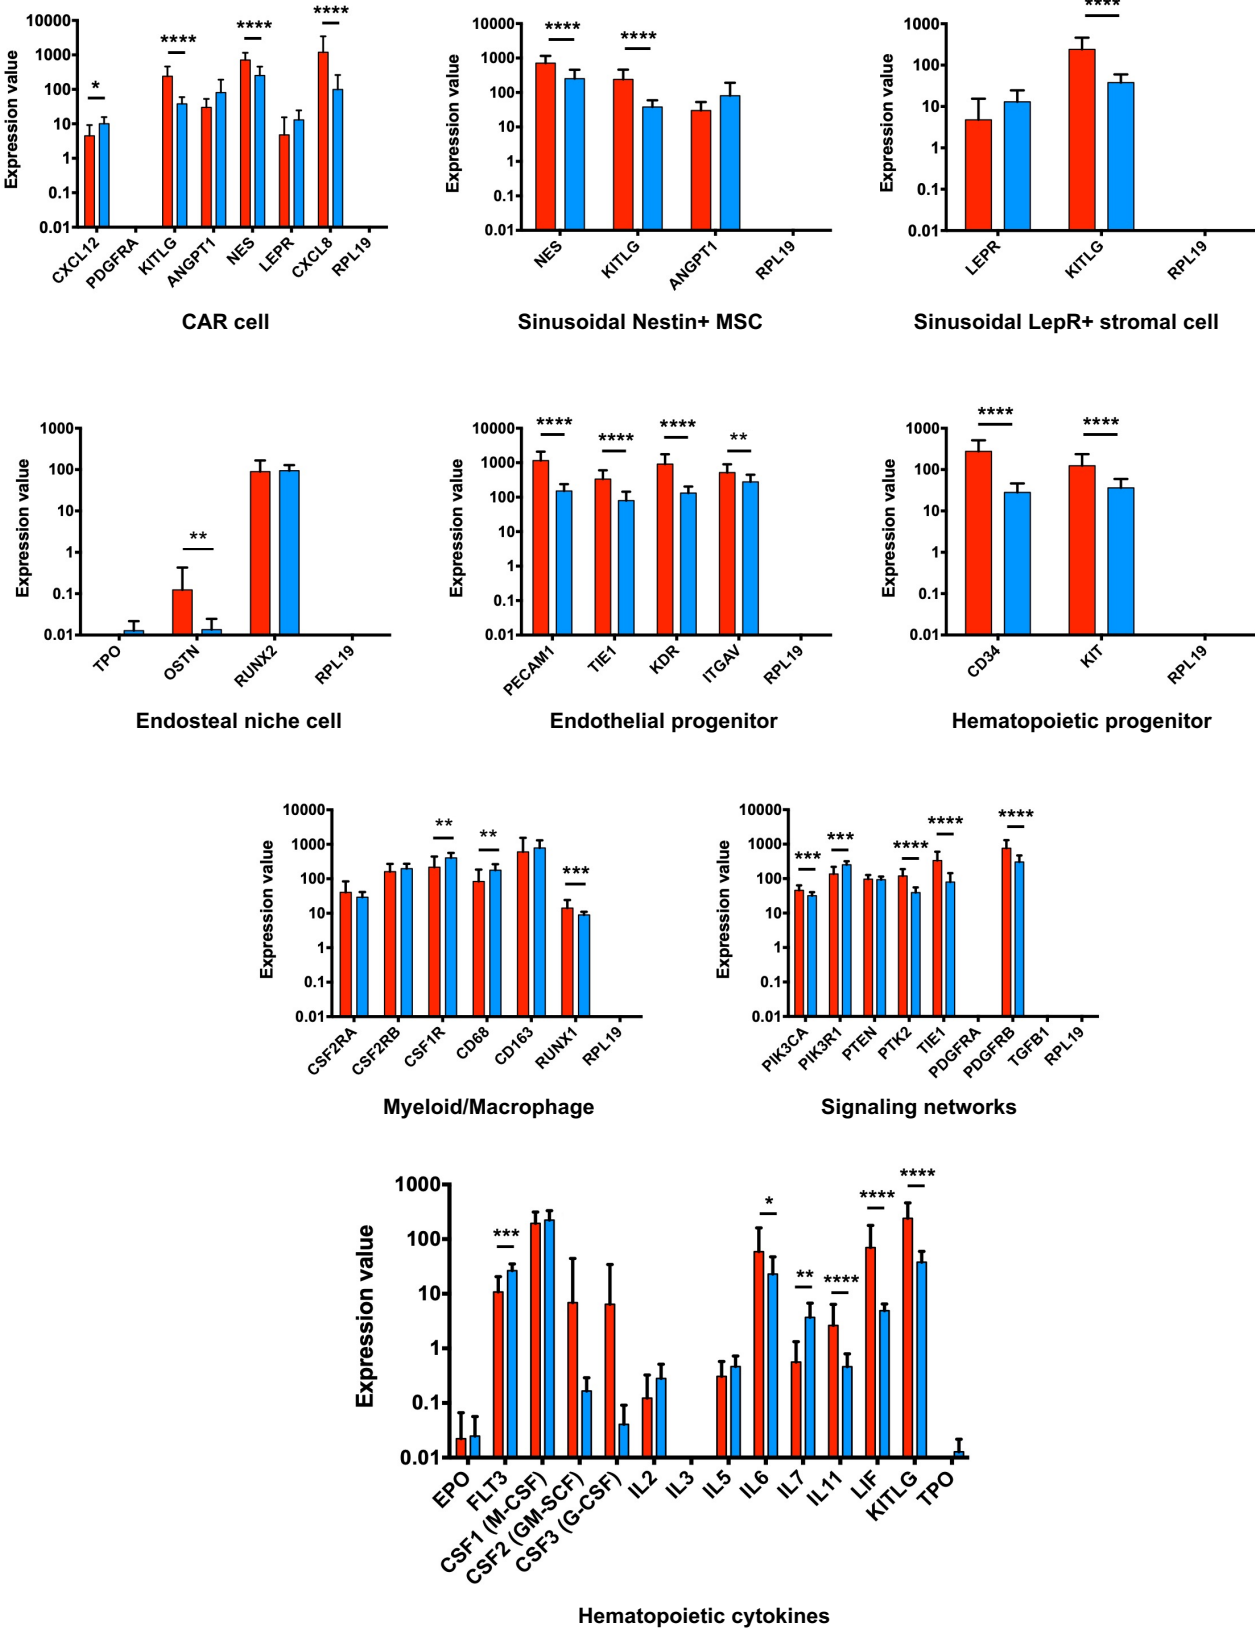

**Figure 6**

**Cells**

■ HSA (N=11)  
■ Hematoma (N=4)

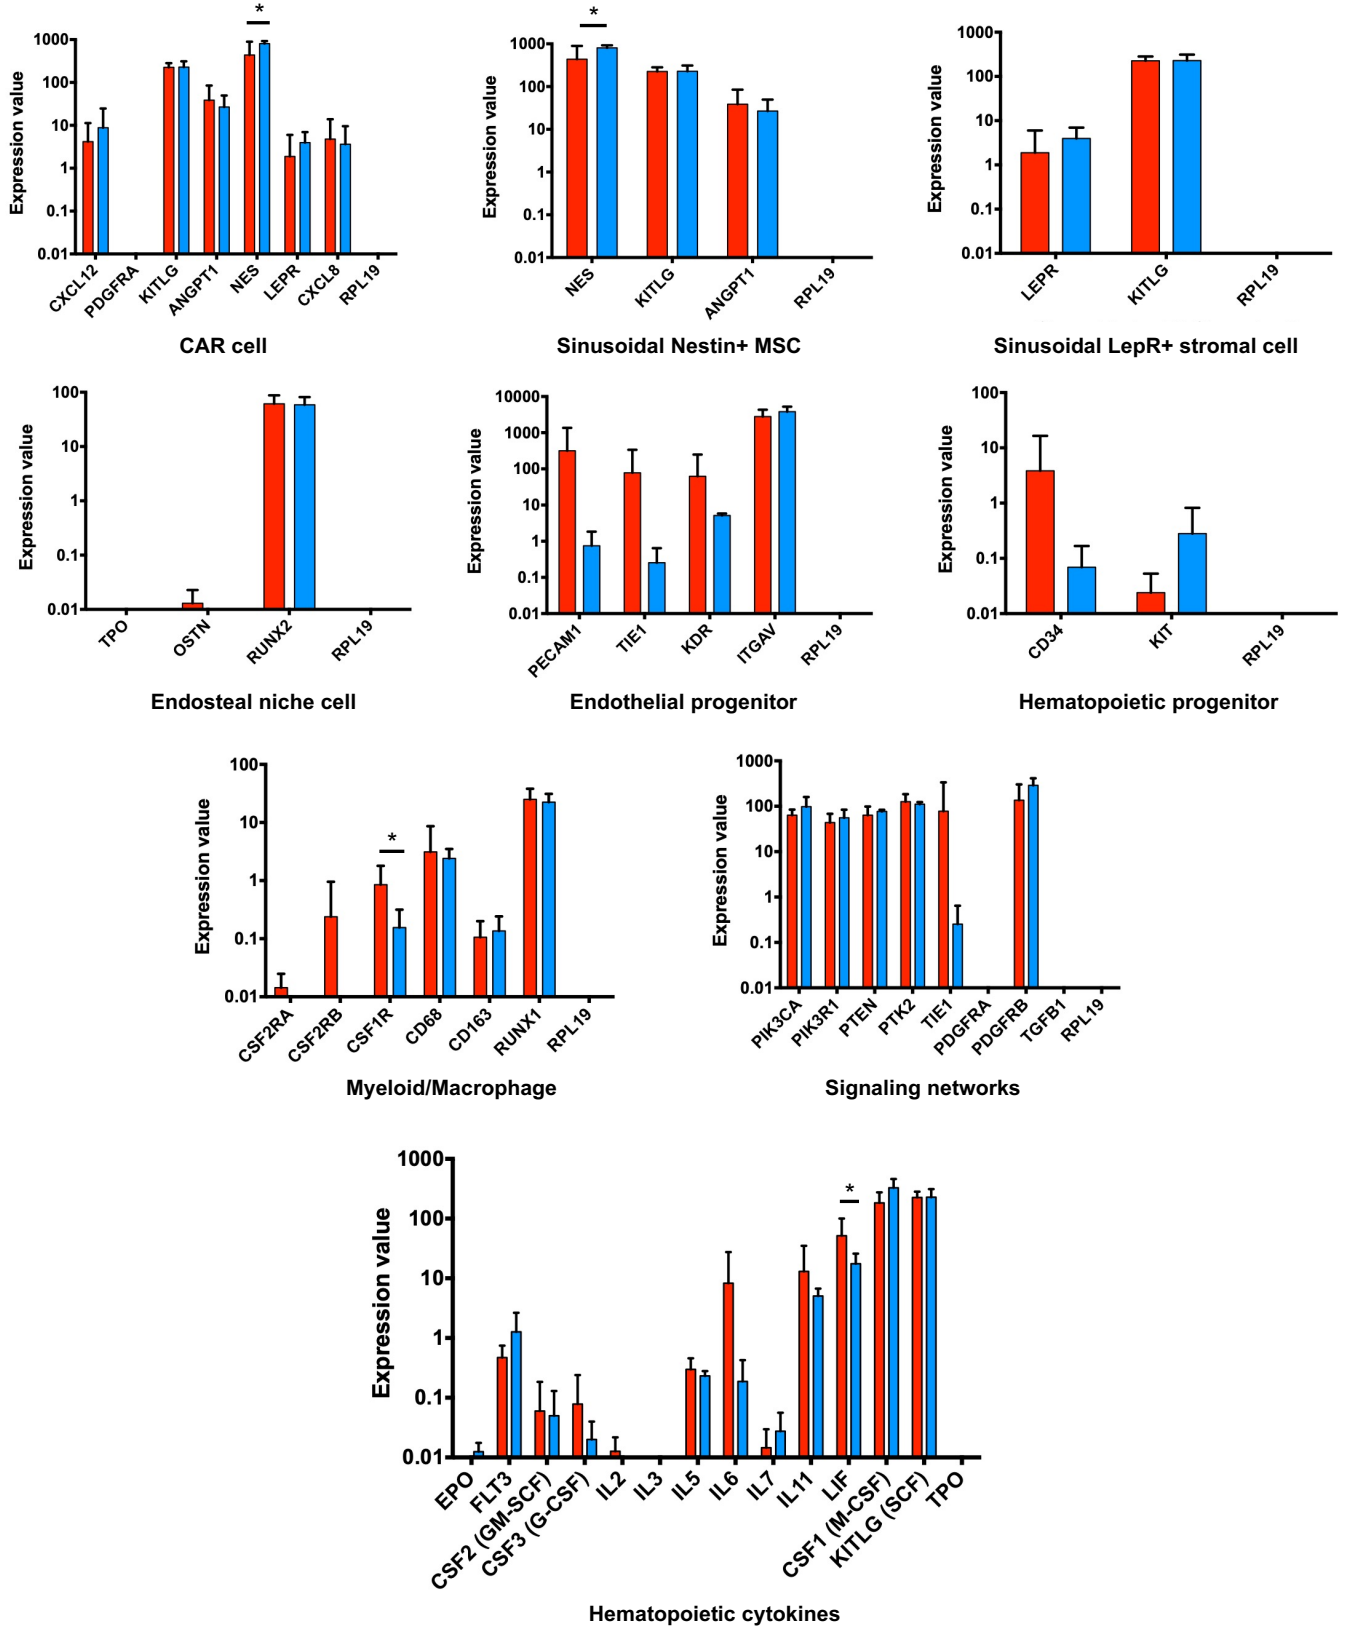



Figure 7

### Angiogenic hemangiosarcoma

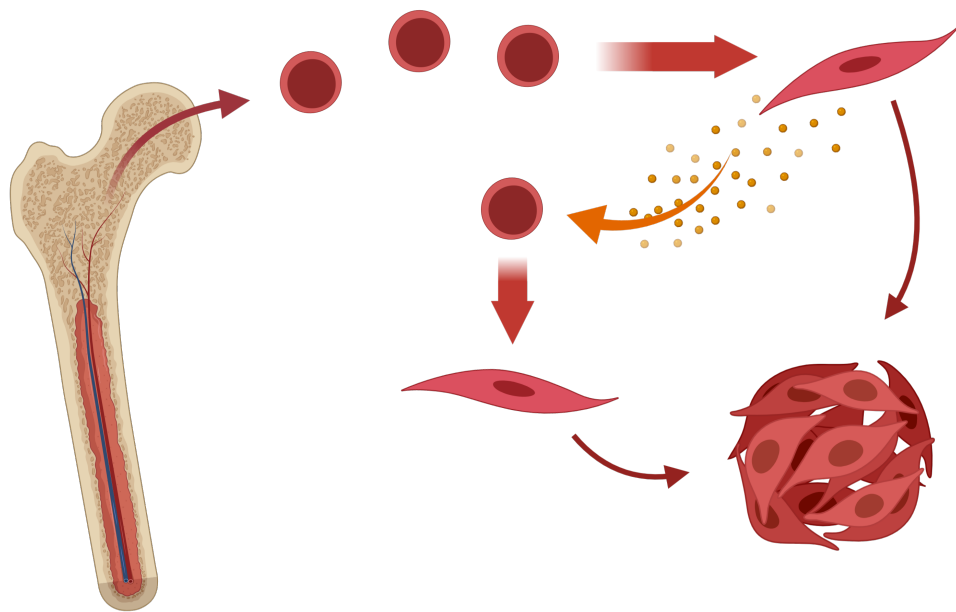

### Inflammatory hemangiosarcoma

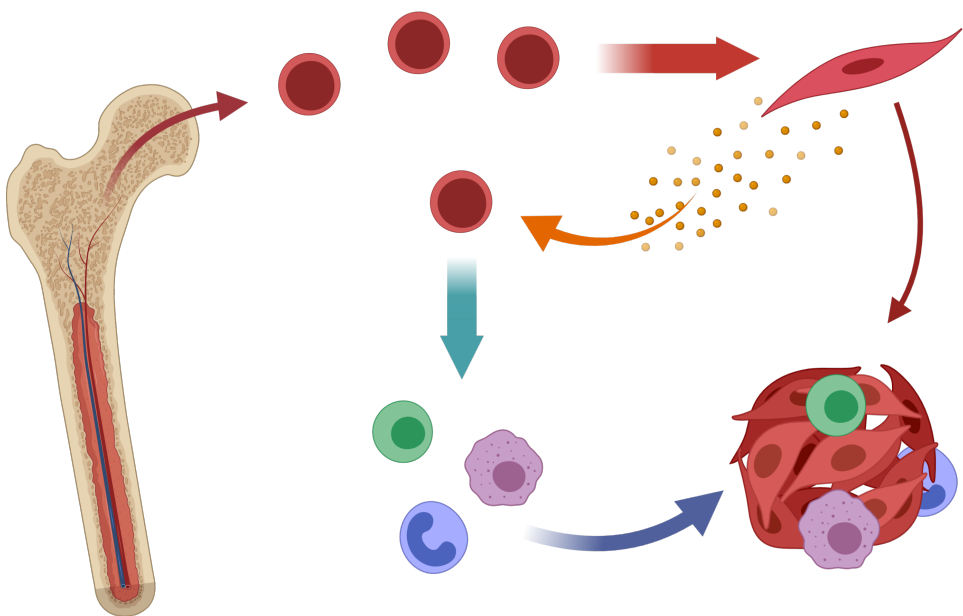

-  Hematopoietic progenitor
-  Hemangiosarcoma cell
-  Cytokines
-  Lymphoid cell
-  Macrophage
-  Neutrophil
