1 **Transcriptional and Functional Activity of Hemangiosarcoma Support Bone Marrow**  
2 **Nurse Cell Ontogeny**

3 Jong Hyuk Kim<sup>1,2,3,\*</sup>, Ashley J. Schulte<sup>1,2,3</sup>, Aaron L. Sarver<sup>1,3,4</sup>, Mathew G. Angelos<sup>5,6,7,8</sup>, Aric  
4 M. Frantz<sup>1,2,3</sup>, Colleen L. Forster<sup>10</sup>, Timothy D. O'Brien<sup>1,3,5,9</sup>, Ingrid Cornax<sup>1,3,9,11</sup>, M. Gerard  
5 O'Sullivan<sup>1,3,9</sup>, Nuojin Cheng<sup>12,13</sup>, Mitzi Lewellen<sup>1,2,3</sup>, LeAnn Oseth<sup>3</sup>, Sunil Kumar<sup>9</sup>, Susan  
6 Bullman<sup>14,15</sup>, Chandra Sekhar Pedamallu<sup>14,16</sup>, Sagar M. Goyal<sup>9</sup>, Matthew Meyerson<sup>14,16</sup>, Troy C.  
7 Lund<sup>17</sup>, Jessica Alfoldi<sup>14</sup>, Matthew Breen<sup>18,19</sup>, Kerstin Lindblad-Toh<sup>14,20</sup>, Erin B. Dickerson<sup>1,2,3</sup>,  
8 Dan S. Kaufman<sup>1,3,5,6,21,22</sup>, Jaime F. Modiano<sup>1,2,3,5,19, 23</sup>

9

10 <sup>1</sup>Animal Cancer Care and Research Program, University of Minnesota, St Paul, MN;

11 <sup>2</sup>Department of Veterinary Clinical Sciences, College of Veterinary Medicine, University of

12 Minnesota, St Paul, MN; <sup>3</sup>Masonic Cancer Center, University of Minnesota, Minneapolis, MN;

13 <sup>4</sup>Institute for Health Informatics, University of Minnesota, Minneapolis, MN; <sup>5</sup>Stem Cell

14 Institute, University of Minnesota, Minneapolis, MN; <sup>6</sup>Department of Medicine (Division of

15 Hematology, Oncology, and Transplantation), Medical School, University of Minnesota,

16 Minneapolis, MN; <sup>7</sup>Microbiology, Immunology and Cancer Biology (MICaB) Graduate

17 Program, University of Minnesota, Minneapolis, MN; <sup>8</sup>Internal Medicine, Hospital of the

18 University of Pennsylvania, Philadelphia, PA; <sup>9</sup>Department of Veterinary Population Medicine,

19 College of Veterinary Medicine, University of Minnesota, St Paul, MN; <sup>10</sup>The University of

20 Minnesota Biological Materials Procurement Network (BioNet), University of Minnesota,

21 Minneapolis, MN; <sup>11</sup>Janssen Research and Development, LLC; <sup>12</sup>School of Mathematics,

22 College of Science and Engineering at the University of Minnesota, Minneapolis; <sup>13</sup>Applied

23 Mathematics, University of Colorado Boulder, Boulder, CO; <sup>14</sup>Broad Institute of MIT and

24 Harvard, Cambridge, MA; <sup>15</sup>Human Biology Division, Fred Hutchinson Cancer Research Center,  
25 Seattle, WA; <sup>16</sup>Department of Medical Oncology, Dana-Farber Cancer Institute and Harvard  
26 Medical School, Boston, MA; <sup>17</sup>Department of Pediatrics, Medical School, University of  
27 Minnesota, Minneapolis, MN; <sup>18</sup>Department of Molecular Biomedical Sciences, College of  
28 Veterinary Medicine, & Comparative Medicine Institute, North Carolina State University,  
29 Raleigh, NC; <sup>19</sup>Cancer Genetics Program, University of North Carolina Lineberger  
30 Comprehensive Cancer Center, Raleigh, NC; <sup>20</sup>Science of Life Laboratory, Department of  
31 Medical Biochemistry and Microbiology, Uppsala University, Uppsala, Sweden; <sup>21</sup>Center for  
32 Immunology, University of Minnesota, Minneapolis, MN; <sup>22</sup>Division of Regenerative Medicine,  
33 Department of Medicine, University of California-San Diego, La Jolla, CA; <sup>23</sup>Department of  
34 Laboratory Medicine and Pathology, Medical School, University of Minnesota, Minneapolis,  
35 MN

36

37 \*Corresponding author: Jong Hyuk Kim, Masonic Cancer Center, University of Minnesota,  
38 Minneapolis, MN 55455, USA.

39 Tel.:+1 612-624-3612; E-mail: [jhkim@umn.edu](mailto:jhkim@umn.edu)

40

41

42

43

44

45

46

47 **Abstract**

48 Hemangiosarcoma and angiosarcoma are soft tissue sarcomas of malignant blood vessel-forming  
49 cells in dogs and humans, respectively. These vasoformative sarcomas are aggressive and highly  
50 metastatic, with disorganized, irregular blood-filled vascular spaces. Our objective was to define  
51 molecular programs that support the niche, enabling progression of canine hemangiosarcoma and  
52 human angiosarcoma. Here, we show that the transcriptional landscape of canine  
53 hemangiosarcoma and human angiosarcoma included comparable angiogenic and inflammatory  
54 programs. Dog-in-mouse hemangiosarcoma xenografts recapitulated the vasoformative and  
55 highly angiogenic morphology and molecular characteristics of primary tumors. Blood vessels in  
56 the tumors were complex and disorganized, and they were lined by both donor and host cells, a  
57 trait that was not observed in xenografts from canine osteosarcoma and lymphoma. In some  
58 cases, the xenografted hemangiosarcoma cells created exuberant myeloid hyperplasia and gave  
59 rise to lymphoproliferative tumors of mouse origin. We did not uncover a definitive  
60 transmissible etiology, but our data indicate that transcriptional programs of hemangiosarcoma  
61 cells resemble those of hematopoietic nurse cells, and these malignant cells support expansion  
62 and differentiation of human hematopoietic progenitors. We conclude that canine  
63 hemangiosarcoma, and possibly human angiosarcoma, originate from nurse cells that make up  
64 the stromal bone marrow niche, and that these cells may also support the growth of  
65 hematopoietic tumors.

66

67 **Keywords:** angiosarcoma, bone marrow, hemangiosarcoma, hematopoiesis, tumor immunity,  
68 tumor niche, tumor ontogeny.

69 **Introduction**

70 Canine hemangiosarcoma is a vasoformative tumor originating from bone marrow (BM)-derived  
71 progenitor cells [1-4]. Unlike human angiosarcoma, which is a rare disease, spontaneous  
72 hemangiosarcoma occurs commonly in dogs. The histology and natural history of these tumors is  
73 similar in both species: both are comprised of disorganized, tortuous, dilated blood vessels with  
74 moderate to high proliferative activity and extremely high metastatic potential [5, 6].  
75 Furthermore, canine hemangiosarcoma and human angiosarcoma appear to establish convergent  
76 molecular programs despite their genomic complexity [7].

77

78 Angiogenesis and inflammation are key molecular features of canine hemangiosarcoma [8], and  
79 convergent transcriptional programs regulating these processes are also observed in human  
80 angiosarcoma [7]. These molecular programs are the foundation for a novel subclassification of  
81 canine hemangiosarcoma [4]. However, the contribution of the tumor microenvironment to these  
82 programs remains incompletely understood. The microenvironment creates the tumor niche, a  
83 complex of cellular and non-cellular components that are essential for tumor cell survival,  
84 disease progression, and metastasis [9]. Emerging data suggest that cancer cells re-educate niche  
85 cells; and conversely, niche cells modulate the function of cancer cells [9-11]. This effect is  
86 especially important for sustaining stemness and self-renewal of cancer stem cells in both solid  
87 and hematopoietic tumors [12-14].

88

89 The hematopoietic niche consists of osteoblasts, and various stromal nurse cells, including  
90 endosteal endothelial cells, fibroblasts, sinusoidal nestin-positive mesenchymal stromal cells,  
91 sinusoidal leptin receptor-positive stromal cells, and CXCL12-abundant reticular (CAR) cells.

92 Together, these cells support the proliferation and differentiation of hematopoietic stem and  
93 progenitor cells (HSPCs) into lineage-committed cells, promoting hematopoiesis [15].  
94 Impairment of the regulation of HSPCs can cause numerous blood disorders [16, 17], as well as  
95 hematopoietic malignancies such as leukemia and lymphoma [18-20].

96

97 Our goal was to define the molecular origin of canine hemangiosarcoma and human  
98 angiosarcoma. Our data indicate that components of the transcriptional programs in these tumors  
99 resemble those of bone marrow nurse cells, and that in addition to their capability to form  
100 vasoformative tumors, canine hemangiosarcoma cells create a niche for expansion and  
101 differentiation of blood cells.

102

## 103 **Methods**

### 104 **Human tissue samples**

105 Formalin-fixed paraffin-embedded tissues of human angiosarcomas were reported previously [7].  
106 The samples were obtained from the University of Minnesota Biological Materials Procurement  
107 Network and from the Cooperative Human Tissue Network under their standardized patient  
108 consent protocols.

109

### 110 **Canine tissue samples and cell lines**

111 Hemangiosarcoma cell lines (SB, COSB, Emma, DD1, JHE, and JLU) were previously  
112 established [1, 2, 4, 21-23]. Canine tissue samples were obtained from surgical removal or  
113 biopsy of tumor at the University of Minnesota or private veterinary clinics, and additional  
114 hemangiosarcoma cell lines (DHSA-1401, DHSA-1420, and DHSA-1426) were generated and

115 cultured as described previously [1, 2, 22]. All protocols and procedures for sample procurement  
116 were reviewed by the Institutional Animal Care and Use Committee (IACUC; protocols  
117 0802A27363, 1101A94713, 1312-31131A) of the University of Minnesota.

118

### 119 **Human and mouse cell lines**

120 Human BM-derived mesenchymal stromal cells (hBM-MSCs) were isolated from whole bone  
121 marrow purchased from AllCells (Emeryville, CA, USA) as previously described [24-27]. M2-  
122 10B4 murine bone marrow stromal cells were purchased from the ATCC (Manassas, VA, USA)  
123 and maintained as previously described [25]. Human umbilical cord blood (hUCB) samples were  
124 obtained from the University of Colorado Cord Blood Bank, ClinImmune Stem Cell Laboratory  
125 [28].

126

### 127 **Mice and xenotransplantation**

128 Female NOD-Scid-Gamma (NSG) and Beige-Nude-Xid (BNX) mice were used for adult  
129 xenografts. Both male and female NSG mice were used for neonatal xenografts. All mice were  
130 housed and handled according to the Research Animal Resources (RAR) husbandry and care  
131 protocols. Procedures for breeding animals and for tumor implantation were reviewed by the  
132 IACUC of the University of Minnesota (protocols 1006A84813, 1106A00649, 1306-30712A,  
133 and 1311-31104A). We performed xenotransplantations in a total of 132 mice as detailed in

### 134 **Table S1.**

135

136 First, we injected cultured-tumor cells from three hemangiosarcoma cell lines (SB, Emma, and  
137 JHE) in 150  $\mu$ L of PBS into irradiated (200gy) NSG mice (N=20): 5 X 10<sup>6</sup> SB cells were

138 injected into the subcutaneous space of four mice and  $5$  or  $10 \times 10^6$  SB cells were injected  
139 intraperitoneally into four mice;  $2 \times 10^6$  Emma cells were injected into four mice each by the  
140 subcutaneous and intraperitoneal routes; and  $3 \times 10^5$  JHE cells were injected into four mice by  
141 the subcutaneous route. Second, we injected tumor cells from five hemangiosarcoma cell lines  
142 (Emma, DD1, JLU, DHSA-1401, and COSB) into NSG neonates (1 or 2 days after birth; N=52):  
143  $5 \times 10^5$  Emma, DD1, JLU, or DHSA-1401 cells, or  $6.25 \times 10^5$  COSB cells were injected  
144 intraperitoneally in  $50 \mu\text{L}$  of PBS. Third, we injected  $5 \times 10^6$  cells from three hemangiosarcoma  
145 cell lines (JLU, DHSA-1420, and DHSA-1426) in a mixture of  $100 \mu\text{L}$  of PBS and  $100 \mu\text{L}$  of  
146 BD Matrigel™ Basement Membrane Matrix (Growth Factor Reduced; BD Biosciences, Bedford,  
147 MA) into the subcutaneous space of BNX mice (N=12). For DHSA-1426, we injected tumor  
148 cells from passage-5 and passage-14, independently. We used BNX mice for patient-derived  
149 tumor xenograft. Sections of viable tumor from four dogs affected with hemangiosarcoma  
150 (DHSA-1413, DHSA-1416, DHSA-1420, and DHSA-1426) were each dissected and implanted  
151 into subcutaneous pockets of four mice (N=16). Sections of non-hemangiosarcoma splenic  
152 tissues from seven dogs were similarly implanted into 18 mice as controls. The tissues included  
153 sections from splenic hematomas (DHSA-1412, DHSA-1417, DHSA-1419, DHSA-1421, and  
154 DHSA-1430). Finally, after visible tumors developed in mice, we serially transplanted the  
155 tumors by inoculation of cultured tumor cells (N=3 mice); or by direct implantation of single cell  
156 suspensions of the tumor (N=8 mice). Mice were sacrificed when they reached a tumor endpoint,  
157 including a mass measuring 1.5 cm in the longest diameter, or at the end of a 16-week period  
158 after xenotransplantation.

159

160 **Statistical analysis**

161 Mann-Whitney U test or Welch's (Heteroscedastic) t-test were performed to determine  
162 differences of continuous values between two groups. Pearson's correlation coefficient was  
163 calculated for correlation between two variables. Statistical analysis was performed using  
164 GraphPad Prism 6 (GraphPad Software, Inc., San Diego, CA, USA) or Microsoft Excel. Kaplan-  
165 Meier survival analysis and log rank test were performed for survival difference using R  
166 programming. P-values are presented without inference of significance, consistent with the  
167 American Statistical Association's Statement on P-Values [29].

168

169 Detailed and additional materials and methods are provided in the Supplementary Methods.

170

## 171 **Results**

### 172 **Canine hemangiosarcoma and human angiosarcoma show parallel transcriptional** 173 **programs and patterns of immune cell infiltration**

174 Canine hemangiosarcomas can be classified into angiogenic, inflammatory, and adipogenic  
175 subtypes based on their transcriptional programs (**Figure S1A**) [4, 7]. This separation is  
176 prognostically significant: of the 43 dogs in this cohort for which we had treatment and outcome  
177 data, those with inflammatory hemangiosarcomas accounted for nearly all that showed prolonged  
178 survival (>150 days, **Figure S1B**). Intriguingly, the subset of dogs whose hemangiosarcomas had  
179 a predominant angiogenic phenotype could be further subdivided into a group with a "pure  
180 angiogenic" molecular signature and a group with a "mixed angiogenic and inflammatory"  
181 molecular signature. Of these, the dogs whose tumors were purely angiogenic (*i.e.*, had deficient  
182 inflammatory signatures), showed the shortest overall survival times (**Figure S1B**).

183



184 Consistent with previously reports [30, 31], human angiosarcomas showed highly enriched  
185 angiogenic signatures [7]. However, the presence of inflammatory signatures in this tumor has  
186 not been thoroughly examined. Using a defined methodology to compare transcriptional  
187 signatures in tumors from different species [32], we identified 588 differentially expressed genes  
188 in canine angiogenic and inflammatory hemangiosarcomas and evaluated the expression of their  
189 homologs in human angiosarcomas. **Figure S1C** shows that comparable angiogenic,  
190 inflammatory, and mixed angiogenic/inflammatory gene expression signatures were present in  
191 canine hemangiosarcomas and in human angiosarcomas.

192  
193 We then used bioinformatics approaches and immunostaining to establish whether the  
194 inflammatory gene signatures arose from the malignant cells themselves [4] or from  
195 inflammatory cell infiltrates within the tumors. ESTIMATE was used to assign tumor purity, and  
196 xCell was used to assign immune scores to each tumor: both tools resulted in consistent scores  
197 (**Figure S2A and B**). Predictably, the immune score for canine samples was correlated with the  
198 predominant transcriptional phenotype for the tumor; *i.e.*, angiogenic tumors had low immune  
199 scores and inflammatory tumors had high immune scores (**Figure S2C and D**). There was a  
200 similar correlation between transcriptional signatures and immune scores in human  
201 angiosarcomas (**Figure S2E and F**). To further verify that these were the result of immune and  
202 inflammatory cells present in the tumors, we stained sections from 11 canine hemangiosarcomas  
203 and 10 human angiosarcomas with antibodies against T cells (CD3), B cells (Pax5), myeloid  
204 cells (Mac387) and macrophages (Iba1 for canine; CD163 for human) (**Figure 1A and B**). CD3+  
205 T cells, PAX5+ B cells, MAC387+ myeloid cells and Iba1+ or CD163+ macrophages were  
206 detectable in both canine and human tumors. Myeloid cells were found most abundantly, while T

207 cells ranged from rare to abundant and B cells were infrequent, and when they were present, the  
208 inflammatory cells were diffusely distributed throughout the tumor tissue. There was a direct  
209 correlation between xCell immune scores and immunohistochemistry scores for both the canine  
210 (Spearman  $R=0.38$ ;  $P = 0.255$ ) and human (Spearman  $R=0.78$ ;  $P = 0.011$ ) samples examined  
211 (**Figure 1C and D**).

212  
213 We next segregated human angiosarcomas into tumors with high and low immune scores  
214 (“immune-high” vs “immune-low”) and identified 461 up-regulated genes (FDR  $P < 0.05$ ) in the  
215 immune-high group compared to immune-low group (**Figure 1E**). Fifty-eight of these genes  
216 were also found in canine inflammatory hemangiosarcomas, and they were associated with T-  
217 and B-cell activation (**Figure 1F and G**). The similarity in tissue organization and infiltrating  
218 patterns of immune cells between the canine and human samples was striking, yet we were  
219 unable to confirm the prognostic value of the immune scores in human angiosarcoma because  
220 this sample set was not annotated with outcome data.

221

## 222 **Canine hemangiosarcoma cells can recapitulate the disease *in vivo***

223 We used *in vivo* xenografts to examine the significance of the angiogenic and inflammatory  
224 phenotypes in tumor biological behavior [21, 23, 33-35]. We inoculated mice with canine  
225 hemangiosarcoma cell lines or primary tissues as described in Table S1. The engraftment  
226 efficiency of canine hemangiosarcoma xenografts was low: in these experiments, only cultured  
227 DHSA-1426 cells injected subcutaneously were able to reproducibly generate vasoformative  
228 tumors in immunodeficient BNX mice (**Figure 2**), and the tumorigenic potential of this cell line

229 was maintained over multiple passages. These tumors could be serially passaged from cells  
230 cultured out of the tumor xenografts and injected into new recipient mice (**Figure S3**).

231

### 232 **Xenografts enable quantification of the stromal contribution to the hemangiosarcoma** 233 **microenvironment**

234 To establish the contribution of stromal elements to the formation of canine hemangiosarcoma,  
235 we used fluorescence *in situ* hybridization (FISH) to enumerate canine and mouse cells in the  
236 tumors. We selected probes for canine *CXCL8*, since this gene is absent from the mouse genome,  
237 and for a unique region of the mouse X chromosome, to identify canine and mouse cells,  
238 respectively. The data show that the hemangiosarcoma xenografts achieved a complex  
239 topological organization, with blood vessels lined concomitantly by donor and host cells (**Figure**  
240 **3A**). The pattern of organization seen in canine hemangiosarcoma xenografts was distinct from  
241 that of canine osteosarcoma and canine lymphoma xenografts (**Figure 3B**). The  
242 hemangiosarcoma tumors were comprised of a mixture of 50-70% malignant canine cells and  
243 30-50% mouse stromal cells. The cellular composition of orthotopic osteosarcoma xenografts  
244 was similar, but none of the malignant canine cells were seen lining blood vessels. The  
245 composition of lymphoma xenografts was remarkably different, including fewer than 5% mouse  
246 stromal cells. Malignant canine cells were also absent from the blood vessels in these tumors  
247 (**Figure 3C**).

248

249 To establish the contribution of stromal elements to the gene expression signatures of canine  
250 hemangiosarcoma, we used a bioinformatics method that aggregates and then segregates  
251 transcripts by species [36] and identified 459 differentially expressed mouse (stromal) genes in

252 the tumor xenografts (**Table S2**). We name-mapped these genes to the canine genome and  
253 examined their expression across all of the 76 samples of primary and metastatic canine  
254 hemangiosarcoma tumors. We then selected overlapping genes between the 1,477 subtype-  
255 specific genes that were differentially expressed across the three canine hemangiosarcoma  
256 subtypes and the 371 mouse-defined stromal genes (**Figure S4A**). This generated a list of 56  
257 genes, whose expression was also examined across the primary and metastatic canine  
258 hemangiosarcoma samples (**Figure S4B**). Strikingly, the results from both analyses showed that  
259 the separation of tumors according to their molecular phenotype was retained in its entirety. It  
260 suggests that the transcriptional programs of tumor stroma are distinct among different types of  
261 hemangiosarcomas, and that stromal elements are necessary and sufficient to define these  
262 different tumor types. However, our experiments do not exclude the possibility that “tumor-  
263 education” is responsible for the distinct patterns of gene expression in stromal elements.

264

265 **Canine hemangiosarcoma cells can induce expansion of hematopoietic cells as well as**  
266 **lymphoma cells *in vivo***

267 An unexpected series of results helped to inform the relationship between hemangiosarcoma and  
268 the presence of inflammation in the microenvironment. We and others showed previously that  
269 canine hemangiosarcoma cells could form hemangiosarcomas in NSG mice [7, 21, 23, 34, 35].  
270 We also observed that some of the NSG mice inoculated with SB hemangiosarcoma cells or with  
271 another cell line called Emma-brain (EFB), and some BNX mice inoculated with DHS-1426  
272 canine patient-derived tumor fragments developed what appeared to be round cell tumors. Four  
273 mice that received  $5 \times 10^6$  SB hemangiosarcoma cells intraperitoneally and one of four mice that  
274 received  $2 \times 10^6$  EFB cells subcutaneously died acutely two weeks after inoculation. The mice

275 showed evidence of anemia and splenomegaly. The spleens in all five mice were expanded by  
276 monomorphic populations of hematopoietic cells (**Figure S5A and B**). Upon further analysis,  
277 the cells were determined to be of mouse origin, representing erythroid progenitors (Ter-119<sup>+</sup>),  
278 with few canine hemangiosarcoma cells admixed in the population (**Figure S5C - F**). We were  
279 unable to definitively establish that these cells had undergone malignant transformation.  
280  
281 Three of four mice that received DHSA-1426 tumor fragments (1<sup>st</sup>-generation canine patient-  
282 derived xenograft or CPDX) formed apparent xenograft tumors in multiple organs including  
283 spleen, lymph nodes, meninges, cerebrum, and mesentery 12 weeks after implantation. However,  
284 the cellular morphology of these tumors was consistent with that of round cell tumors (**Figure**  
285 **S6A and B**). We determined that the tumor cells expressed CD45 of mouse origin, B220, and  
286 Pax5, without expression of CD3, Ter-119, and MPO, indicating a mouse B-cell origin (**Figure**  
287 **S6C - H**). We verified the mouse origin using flow cytometry based on the tumor cells staining  
288 with an antibody directed against mouse CD45, but not with antibodies directed against canine  
289 CD45 and human  $\alpha V\beta_3$ -integrin, which cross reacts with canine, but not with mouse  $\alpha V\beta_3$ -  
290 integrin (**Figure S7**). These B-cells could be serially passaged, forming B-cell lymphomas in  
291 recipient BNX mice without the need for supporting canine hemangiosarcoma cells (**Figure**  
292 **S8A**). Intriguingly, we observed a similar result when we inoculated single cell suspensions  
293 derived from fresh tumor fragments of canine hemangiosarcoma xenografts into BNX recipients  
294 (2<sup>nd</sup> generation CPDX from a 1<sup>st</sup> generation cell line tumor). The resulting tumors had similar  
295 morphology and were also of mouse B-cell origin and could be serially passaged in BNX mice  
296 (**Figure S8B**).  
297

298 **Canine hemangiosarcoma supports expansion and differentiation of CD34+ human**  
299 **umbilical cord blood cells**

300 The potential etiology of these tumors was perplexing. We first examined whether the tumors  
301 might be caused by horizontal gene transfer. We used the method described above (in **Figure 3**  
302 and **Figure S4**) to identify species-specific transcripts [36]. Canine DHS-1426 cells expressed  
303 only canine genes, whereas canine hemangiosarcoma xenograft tumors expressed a mixture of  
304 canine and mouse genes (**Figure S9**). In contrast, the genes expressed by the B-cell lymphomas  
305 arising from the hemangiosarcoma xenograft were almost exclusively of mouse origin.

306  
307 Next, we sequenced viral RNA from the xenografts and used PathSeq platform to evaluate the  
308 potential for a transmissible, infectious agent as the cause of these tumors. Notably, no bacterial  
309 or viral sequences with tumorigenic potential were identified in the xenografts as well as in the  
310 primary or metastatic canine hemangiosarcoma tumor samples or cell lines. A recent study  
311 reported an association between *Bartonella spp* and canine hemangiosarcoma [37]. Ten of 24  
312 dogs tested in our study had detectable *Bartonella spp* sequences, although these were present in  
313 low abundance (**Table S3**). Furthermore, four of the samples contained only sequences from *B.*  
314 *bacilliformis*, *B. grahamii*, or *B. tribocorum*, which infect humans and rats, respectively, and  
315 none of which is known to infect dogs as a primary or accidental host [38, 39]. Three of the  
316 remaining six dogs had sequences for *B. clarridgeiae* and three had sequences for multiple  
317 *Bartonella spp.*, including the human and rodent-specific types. Together, the low abundance and  
318 the presence of sequences from organisms that do not infect dogs suggest that the *Bartonella spp.*  
319 sequences might have been contaminants.

320

321 On the other hand, murine leukemia virus (MuLV) reads were reproducibly identified in the  
322 mouse B-cell lymphomas arising from the hemangiosarcoma xenografts (**Table S4**). The  
323 presence of MuLV sequences was further confirmed in one mouse B-cell lymphoma arising from  
324 the hemangiosarcoma xenografts and in two subcutaneous canine hemangiosarcoma xenograft  
325 tumors through independent viral RNA sequencing experiments. Moreover, MuLV sequences  
326 could be amplified by polymerase chain reaction (PCR) from normal mouse tissues (liver and  
327 spleen), from each of three mouse B-cell lymphomas arising from the hemangiosarcoma  
328 xenografts, and from two subcutaneous canine hemangiosarcoma xenograft tumors. MuLV  
329 appears to be a promiscuous virus, and we also found it in SB hemangiosarcoma cells that had  
330 been previously passaged through mice as hemangiosarcomas.

331  
332 These results suggested that MuLV might be the transforming agent giving rise to the mouse  
333 lymphomas, and pointed to a third possibility, that canine hemangiosarcoma cells were able to  
334 provide a suitable environment for expansion of these MuLV-transformed B-cells. We thus  
335 examined the potential for DHSA-1426 and EFB canine hemangiosarcoma cells to promote and  
336 maintain hematopoiesis in long-term culture initiating cell (LTC-IC) assays designed to promote  
337 expansion and differentiation of CD34<sup>+</sup> human umbilical cord blood hematopoietic progenitor  
338 cells (HPCs). Mouse M2-10B4 and human bone marrow derived mesenchymal stromal cells  
339 (MSCs) were used as positive controls, and HPCs cultured in the absence of feeder cells were  
340 used as a negative control. We found that DHSA-1426 cells promoted expansion of human  
341 CD34<sup>+</sup> HPCs with at least equal, if not better efficiency than conventional mouse or human  
342 feeder cells, and they achieved comparable proportions of hematopoietic cell differentiation *in*

343 *in vitro* across all cell lineages (**Figure 4 and Figure S10**). Similar results were obtained for EFB  
344 cells, although the expansion and differentiation were somewhat more limited.

345

346 **Canine hemangiosarcoma and human angiosarcoma establish transcriptional programs**  
347 **that support hematopoietic expansion and differentiation to create a tumor immune niche**

348 Finally, we evaluated whether hemangiosarcoma cells expressed genes that characterize distinct  
349 stromal cells in the bone marrow niche, including sinusoidal nestin<sup>+</sup> mesenchymal stromal cells,  
350 CXCL12-abundant reticular (CAR) cells, and sinusoidal leptin receptor (LeptinR)<sup>+</sup> stromal cells.  
351 **Figure 5 and Table S5** show that canine hemangiosarcoma tissues showed enrichment of genes  
352 expressed by CAR cells, sinusoidal stromal cells, endosteal niche cells, endothelial progenitors,  
353 and hematopoietic progenitors. The tumors showed higher expression of cytokines such as *CSF3*,  
354 *IL6*, *IL11*, and *LIF*, associated with hematopoiesis and expansion of hematopoietic progenitors,  
355 whereas expression of *FLT3* and *IL7*, which are also involved in hematopoiesis and lymphoid  
356 homeostasis, were lower in hemangiosarcomas than the hematoma tissues. The tumors also  
357 showed down-regulation of genes associated with myeloid cells and macrophages. Next, we  
358 sought to determine if these gene signatures were also enriched in cultured hemangiosarcoma  
359 cells (cell lines) where the tumor microenvironmental factors were depleted. **Figure 6 and Table**  
360 **S6** show that hemangiosarcoma cells up-regulate some genes associated with endothelial  
361 progenitors and hematopoietic cytokines such as *PECAM1*, *TIE1*, *KDR*, *CD34*, *CSF3*, *IL6*, *IL11*,  
362 and *LIF in vitro*, with significant down-regulation of *NES*. Unlike hemangiosarcoma tissues, the  
363 hemangiosarcoma cell lines showed a higher level of genes expressed by myeloid cells and  
364 macrophage such as *CSF2RB*, *CSF1R* and *CD68*. DHS-1426 and EFB cells in particular,



365 showed remarkable enrichment of those genes, consistent with their documented capability to  
366 support hematopoietic expansion and differentiation (**Figure 4**).

367

## 368 **Discussion**

369 Vasoformative sarcomas are uniformly aggressive tumors with uncertain cellular origin.

370 Angiosarcomas of humans and hemangiosarcomas of dogs have been proposed to arise from a  
371 multipotent bone marrow cell, possibly a hemangioblastic progenitor, while hemangiosarcomas  
372 of mice may arise from lineage committed endothelial progenitor cells [1-4, 7].

373 Human angiosarcomas and canine hemangiosarcomas have a limited shared mutational spectrum,  
374 primarily in the canine visceral forms of the disease and in human breast angiosarcomas [7, 40-  
375 45]. But the tumors in both species, as well as in zebrafish, seem to activate convergent  
376 transcriptional programs characterized by deregulation of phosphoinositide 3-kinase pathways [7,  
377 46].

378

379 The transcriptional landscape of human angiosarcoma and canine hemangiosarcoma is strongly  
380 pro-angiogenic; however, a subset of tumors from both species is characterized by the presence  
381 of robust transcriptional immune and inflammatory signatures, which are proportional to the  
382 number of detectable T cells and macrophages. Our results also suggest that at least in dogs, the  
383 tumors with such signatures accounts for virtually all of the long-term survivors. Additional  
384 work will be necessary to establish if the different outcomes we observed in this cohort is  
385 generally representative of canine splenic hemangiosarcoma, where approximately 15% of dogs  
386 with localized or regional disease are expected to survive a year or longer when treated with the  
387 standard of care [47, 48].

388

389 The data from our canine hemangiosarcoma xenograft experiments confirm the notion that the  
390 chaotic vascular organization is driven by the tumor cells [1, 21, 23]. The experiments show that  
391 the tumor vessels are formed by a combination of malignant tumor cells and non-malignant host  
392 endothelial cells. This observation was unique to hemangiosarcoma among the three types of  
393 xenografts we examined, and it supports the capacity of hemangiosarcoma cells to adopt  
394 endothelial functions. In parallel, it suggests that normal (non-malignant) cells are necessary for  
395 the formation of malignant blood vessels in the vasculogenic tumors. Intriguingly, these  
396 experiments also show that the stromal contribution to the angiogenic and inflammatory  
397 transcriptional signatures is highly conserved in the xenografts, suggesting that the stromal cells  
398 in these tumors are heavily conditioned or reprogrammed by the malignant cells. Together, the  
399 results suggest that the interactions between the tumor and its microenvironment are rigorously  
400 orchestrated in the formation of the hemangiosarcoma niche, highlighting a potential point of  
401 vulnerability.

402

403 The development of exuberant myeloid and erythroid hyperplasia, as well as of bona fide  
404 lymphomas arising from mouse cells in animals with primary or secondary hemangiosarcoma  
405 xenografts was initially perplexing. Our results indicate that a transmissible etiology (from dog  
406 to mouse) is unlikely to be the cause of these expanded hematopoietic cell populations. Rather,  
407 the data indicate that at least a subset of canine hemangiosarcomas is capable of supporting  
408 robust expansion and differentiation of hematopoietic progenitor cells *in vitro*, and we interpret  
409 that this property is responsible for the expansion of myeloid cells *in vivo*, both in mice and in  
410 primary canine tumors. In the case of lymphomas, which occurred repeatedly and independently

411 in animals receiving different tumor preparations, MuLV might have provided the driver events  
412 for transformation of residual lymphoid elements within a hyperproliferative environment  
413 created by the hemangiosarcoma cells. Our findings are also consistent with a report showing  
414 angiosarcoma in the bone marrow of a human patient with tumor-associated myeloid  
415 proliferation and extramedullary hematopoiesis [49]. The presence of transcriptional programs  
416 seen in hemangiosarcoma cells that resemble those of CAR cells, sinusoidal stromal cells, and  
417 endosteal niche cells, is consistent with this interpretation, and it increases the probability that  
418 canine hemangiosarcomas – and possibly human angiosarcomas – arise from one or more of  
419 these bone marrow nurse cells.

420

421 Other unexpected tumors have been reported in xenograft experiments and in pre-clinical models  
422 of stem cell transplantation. For instance, transplantation of murine MSCs has been reported to  
423 induce tumor formation and tissue malformation, potentially as a result of their possible genetic  
424 instability and/or cellular transformation [50-52]. It has also been reported that patient-derived  
425 xenografts of human solid cancers including breast, colon, pancreatic cancer, and  
426 rhabdomyosarcoma induce lymphomagenesis or lymphocytic tumors in immunodeficient mice,  
427 but in these cases, the tumors were derived from human tumor-infiltrating lymphocytes  
428 transformed by Epstein-Barr virus [53-56]. These previously reported tumors were all of donor  
429 origin, while the tumors in our study originated from the mouse recipients and were distinct from  
430 the donor hemangiosarcomas. We were unable to identify and reports of hematopoietic tumors of  
431 recipient origin arising from xenotransplantation experiments using other types of canine cancers  
432 in the published literature, and we have not observed such an event in our own studies [36, 57,  
433 58]. Thus, this finding appears to be unique to canine hemangiosarcoma, and may be due to the

434 ability of hemangiosarcoma cells to support hematopoietic expansion. Our findings also suggest  
435 that the normal counterparts of canine hemangiosarcoma cells might contribute to the  
436 development of hematopoietic malignancies through the creation of a permissive niche.  
437 Additionally, transdifferentiation between lymphoma and sarcoma may occur through cellular  
438 reprogramming, potentially initiated by hematopoietic disruption [59]. In this light, it is  
439 especially interesting that a shared region of the canine genome was found to be significantly  
440 associated with B-cell lymphomas and hemangiosarcomas of golden retrievers [60].

441  
442 The capacity to create space for bone marrow transplants and adoptive cell therapies has taught  
443 us that the hematopoietic niche is resilient, and that bone marrow stromal cells are highly  
444 resistant to chemotherapy and radiation. These intrinsic properties could explain the relatively  
445 poor long-term responses of human patients with angiosarcoma and of dogs with  
446 hemangiosarcoma to cytotoxic therapies and may open the door to develop more effective  
447 treatments. Nevertheless, we must recognize that therapies targeting the hematopoietic niche  
448 might themselves carry the potential for high toxicity.

449  
450 Our data provide a new model to understand the etiology and cell of origin of canine  
451 hemangiosarcomas and possibly human angiosarcomas. We propose that the malignant cells  
452 originate from a bone marrow nurse cell, which has the potential to create a niche that favors  
453 angiogenic proliferation or hematopoietic expansion, as illustrated by the models in **Figure 7**.  
454 The robust inflammation observed in some of these tumors, then, may be intrinsic to the tumor,  
455 and not simply due to extrinsic factors associated with tissue disruption. These paths of  
456 differentiation may also control the biological behavior of the tumors, with those showing strong

457 angiogenic propensity also having the most aggressive behaviors [7].

458

459 Finally, our data do not support a transmissible etiology for hemangiosarcoma, but they do

460 suggest that the permissive niche created by these cells can lead to the development of

461 hematopoietic tumors driven by leukemia viruses in mice, raising the possibility that the bone

462 marrow niche plays a similar role in viral lymphomas and leukemias of humans.

463

## 464 **Conclusions**

465 In summary, our data show that molecular programs that support expansion of immune and

466 inflammatory cells in hemangiosarcoma resemble those of bone marrow nurse cells, providing

467 insight to the potential role of these cells – whether physiologically or pathologically – in

468 creating a permissive environment for the progression of hematopoietic malignancies.

469

## 470 **List of abbreviations**

471 BM: Bone marrow; CAR: CXCL12-abundant reticular; HSPC: hematopoietic stem and

472 progenitor cell; IACUC: Institutional Animal Care and Use Committee; hBM-MS: Human

473 BM-derived mesenchymal stromal cell; hUCB: Human umbilical cord blood; NSG: NOD-Scid-

474 Gamma; BNX: Beige-Nude-Xid; RAR: Research Animal Resources; FISH: fluorescence in situ

475 hybridization; EFB: Emma-brain; CPDX: canine patient-derived xenograft; MuLV: murine

476 leukemia virus; PCR: Polymerase chain reaction; LTC-IC: long-term culture initiating cell

477 HPC: hematopoietic progenitor cell; MSC: mesenchymal stromal cell; CFU: colony-forming unit

478

## 479 **Declarations**

480 **Ethics approval and consent to participate**

481 Archival human tissue samples were obtained from the University of Minnesota Biological  
482 Materials Procurement Network and from the Cooperative Human Tissue Network under their  
483 standardized patient consent protocols. Animal experiments and sample procurement were  
484 performed in accordance with the guidelines of the Institutional Animal Care and Use  
485 Committee of the University of Minnesota.

486

487 **Consent for publication**

488 Not applicable.

489

490 **Availability of data and material**

491 RNA-seq data from human angiosarcoma tissues are available through the Gene Expression  
492 Omnibus (GEO; accession number GSE163359). RNA-Seq data from canine hemangiosarcoma  
493 tissues are available through the GEO (accession number GSE95183) and the NCBI Sequence  
494 Read Archive (accession number PRJNA562916). Other data relevant to this study are available  
495 upon request to the corresponding author.

496

497 **Competing interests**

498 No potential conflicts of interest were disclosed.

499

500 **Funding**

501 This work was partially supported by grants 1R03CA191713-01 (to J.F. Modiano, A.L. Sarver,  
502 and J.H. Kim) from the NCI of the NIH, grants #02759 (to J.H. Kim), #422 (to J.F. Modiano),

503 and 1889-G (to J.F. Modiano, M. Breen, and K. Lindblad-Toh) from the AKC Canine Health  
504 Foundation, grant JHK15MN-004 (to J.H. Kim) from the National Canine Cancer Foundation,  
505 grant D10-501 (to J.F. Modiano, M. Breen, and K. Lindblad-Toh) from Morris Animal  
506 Foundation, and a grant from Swedish Cancerfonden (to K. Lindblad-Toh). This work was also  
507 supported by an NIH NCI R50 grant, CA211249 (to A.L. Sarver). The NIH Comprehensive  
508 Cancer Center Support Grant to the Masonic Cancer Center, University of Minnesota (P30  
509 CA077598) provided support for the cytogenetic analyses performed in the Cytogenomics  
510 Shared Resource. M. Breen is supported in part by the Oscar J. Fletcher Distinguished  
511 Professorship in Comparative Oncology Genetics at North Carolina State University. K.  
512 Lindblad-Toh is supported by a Distinguished Professor award from the Swedish Research  
513 Council. J.F. Modiano is supported by the Alvin and June Perlman Chair in Animal Oncology.

514

#### 515 **Authors' Contributions**

516 J.H.K., and J.F.M conceptualized the study, designed experiments, and supervised the project.  
517 J.H.K., A.L.S., N.C., J.A., M.B., and K.L.T. analyzed RNA-seq data and provided computational  
518 methodology. S.B., C.S.P., and M.M ran PathSeq algorithms and analyzed data. S.K., and  
519 S.M.G. performed PCR experiment from viral RNA and analyzed MiSeq data. M.M., and M.B.  
520 contributed to analysis and interpretation of PathSeq and MiSeq data. J.H.K, A.J.S., and A.M.F.  
521 performed mouse experiments. M.G.A., T.C.L., D.S.K. performed LTC-IC and CFU assays and  
522 analyzed data. A.J.S. performed flow cytometrical analysis. C.L.F. generated histological  
523 samples and performed IHC. A.J.S., and M.L. provided administrative, technical, and material  
524 support. J.H.K., I.C., T.D.O., and M.G.O. performed histopathological review and scoring  
525 analysis. L.O. conducted FISH experiments. J.H.K., A.J.S., A.L.S., E.B.D., and J.F.M. wrote,

526 reviewed, and revised the manuscript with help from all authors. All authors read the manuscript  
527 and approved the final draft.

528

## 529 **Acknowledgements**

530 The authors acknowledge Keumsoon Im for assistance with experiments and data acquisition.

531 The authors would also like to acknowledge Milcah Scott for processing the next generation

532 sequencing data and assistance with data analysis. Artistic design of Figures 2A and 7 was

533 created with Biorender (biorender.com). The authors gratefully acknowledge donations to the

534 Animal Cancer Care and Research Program of the University of Minnesota that helped support

535 this project. The content of this manuscript is solely the responsibility of the authors and does not

536 necessarily represent the official views of any of the funding agencies listed above.

537

## 538 **References**

539 1. Fosmire SP, Dickerson EB, Scott AM, Bianco SR, Pettengill MJ, Meylemans H, Padilla M,

540 Frazer-Abel AA, Akhtar N, Getzy DM *et al*: **Canine malignant hemangiosarcoma as a**

541 **model of primitive angiogenic endothelium.** *Lab Invest* 2004, **84**(5):562-572.

542 2. Lamerato-Kozicki AR, Helm KM, Jubala CM, Cutter GC, Modiano JF: **Canine**

543 **hemangiosarcoma originates from hematopoietic precursors with potential for**

544 **endothelial differentiation.** *Exp Hematol* 2006, **34**(7):870-878.

545 3. Liu L, Kakiuchi-Kiyota S, Arnold LL, Johansson SL, Wert D, Cohen SM: **Pathogenesis of**

546 **human hemangiosarcomas and hemangiomas.** *Hum Pathol* 2013, **44**(10):2302-2311.

547 4. Gorden BH, Kim JH, Sarver AL, Frantz AM, Breen M, Lindblad-Toh K, O'Brien TD,

548 Sharkey LC, Modiano JF, Dickerson EB: **Identification of three molecular and functional**



- 549        **subtypes in canine hemangiosarcoma through gene expression profiling and progenitor**  
550        **cell characterization.** *Am J Pathol* 2014, **184**(4):985-995.
- 551    5. Italiano A, Thomas R, Breen M, Zhang L, Crago AM, Singer S, Khanin R, Maki RG,  
552        Mihailovic A, Hafner M *et al*: **The miR-17-92 cluster and its target THBS1 are**  
553        **differentially expressed in angiosarcomas dependent on MYC amplification.** *Genes*  
554        *Chromosomes Cancer* 2012, **51**(6):569-578.
- 555    6. Kim JH, Graef A, Dickerson E, Modiano J: **Pathobiology of Hemangiosarcoma in Dogs:**  
556        **Research Advances and Future Perspectives.** *Vet Sci* 2015, **2**(4):388.
- 557    7. Kim JH, Megquier K, Thomas R, Sarver AL, Song JM, Kim YT, Cheng N, Schulte AJ,  
558        Linden MA, Murugan P *et al*: **Genomically Complex Human Angiosarcoma and Canine**  
559        **Hemangiosarcoma Establish Convergent Angiogenic Transcriptional Programs Driven**  
560        **by Novel Gene Fusions.** *Mol Cancer Res* 2021, **19**(5):847-861
- 561    8. Tamburini BA, Phang TL, Fosmire SP, Scott MC, Trapp SC, Duckett MM, Robinson SR,  
562        Slansky JE, Sharkey LC, Cutter GR *et al*: **Gene expression profiling identifies**  
563        **inflammation and angiogenesis as distinguishing features of canine hemangiosarcoma.**  
564        *BMC Cancer* 2010, **10**:619.
- 565    9. Quail DF, Joyce JA: **Microenvironmental regulation of tumor progression and**  
566        **metastasis.** *Nat Med* 2013, **19**(11):1423-1437.
- 567    10. Colmone A, Amorim M, Pontier AL, Wang S, Jablonski E, Sipkins DA: **Leukemic cells**  
568        **create bone marrow niches that disrupt the behavior of normal hematopoietic**  
569        **progenitor cells.** *Science* 2008, **322**(5909):1861-1865.
- 570    11. Schreiber RD, Old LJ, Smyth MJ: **Cancer immunoediting: integrating immunity's roles**  
571        **in cancer suppression and promotion.** *Science* 2011, **331**(6024):1565-1570.

- 572 12. Lane SW, Scadden DT, Gilliland DG: **The leukemic stem cell niche: current concepts and**  
573 **therapeutic opportunities.** *Blood* 2009, **114**(6):1150-1157.
- 574 13. Charles N, Ozawa T, Squatrito M, Bleau AM, Brennan CW, Hambardzumyan D, Holland  
575 EC: **Perivascular nitric oxide activates notch signaling and promotes stem-like**  
576 **character in PDGF-induced glioma cells.** *Cell Stem Cell* 2010, **6**(2):141-152.
- 577 14. Vermeulen L, De Sousa EMF, van der Heijden M, Cameron K, de Jong JH, Borovski T,  
578 Tuynman JB, Todaro M, Merz C, Rodermond H *et al*: **Wnt activity defines colon cancer**  
579 **stem cells and is regulated by the microenvironment.** *Nat Cell Biol* 2010, **12**(5):468-476.
- 580 15. Adams GB, Scadden DT: **The hematopoietic stem cell in its place.** *Nat Immunol* 2006,  
581 **7**(4):333-337.
- 582 16. de Haan G, Lazare SS: **Aging of hematopoietic stem cells.** *Blood* 2018, **131**(5):479-487.
- 583 17. Filippi MD, Ghaffari S: **Mitochondria in the maintenance of hematopoietic stem cells:**  
584 **new perspectives and opportunities.** *Blood* 2019, **133**(18):1943-1952.
- 585 18. Wu JY, Purton LE, Rodda SJ, Chen M, Weinstein LS, McMahon AP, Scadden DT,  
586 Kronenberg HM: **Osteoblastic regulation of B lymphopoiesis is mediated by Gs{alpha}-**  
587 **dependent signaling pathways.** *Proc Natl Acad Sci U S A* 2008, **105**(44):16976-16981.
- 588 19. Raaijmakers MH, Mukherjee S, Guo S, Zhang S, Kobayashi T, Schoonmaker JA, Ebert BL,  
589 Al-Shahrour F, Hasserjian RP, Scadden EO *et al*: **Bone progenitor dysfunction induces**  
590 **myelodysplasia and secondary leukaemia.** *Nature* 2010, **464**(7290):852-857.
- 591 20. Kode A, Manavalan JS, Mosialou I, Bhagat G, Rathinam CV, Luo N, Khiabani H, Lee A,  
592 Murty VV, Friedman R *et al*: **Leukaemogenesis induced by an activating beta-catenin**  
593 **mutation in osteoblasts.** *Nature* 2014, **506**(7487):240-244.

- 594 21. Akhtar N, Padilla ML, Dickerson EB, Steinberg H, Breen M, Auerbach R, Helfand SC:  
595 **Interleukin-12 inhibits tumor growth in a novel angiogenesis canine hemangiosarcoma**  
596 **xenograft model.** *Neoplasia* 2004, **6**(2):106-116.
- 597 22. Tamburini BA, Trapp S, Phang TL, Schappa JT, Hunter LE, Modiano JF: **Gene expression**  
598 **profiles of sporadic canine hemangiosarcoma are uniquely associated with breed.** *PLoS*  
599 *One* 2009, **4**(5):e5549.
- 600 23. Kim JH, Frantz AM, Anderson KL, Graef AJ, Scott MC, Robinson S, Sharkey LC, TD OB,  
601 Dickerson EB, Modiano JF: **Interleukin-8 promotes canine hemangiosarcoma growth by**  
602 **regulating the tumor microenvironment.** *Exp Cell Res* 2014, **323**(1):155-164.
- 603 24. Hicok KC, Thomas T, Gori F, Rickard DJ, Spelsberg TC, Riggs BL: **Development and**  
604 **characterization of conditionally immortalized osteoblast precursor cell lines from**  
605 **human bone marrow stroma.** *J Bone Miner Res* 1998, **13**(2):205-217.
- 606 25. Kopher RA, Penchev VR, Islam MS, Hill KL, Khosla S, Kaufman DS: **Human embryonic**  
607 **stem cell-derived CD34+ cells function as MSC progenitor cells.** *Bone* 2010, **47**(4):718-  
608 728.
- 609 26. Zou L, Kidwai FK, Kopher RA, Motl J, Kellum CA, Westendorf JJ, Kaufman DS: **Use of**  
610 **RUNX2 expression to identify osteogenic progenitor cells derived from human**  
611 **embryonic stem cells.** *Stem Cell Reports* 2015, **4**(2):190-198.
- 612 27. Zou L, Chen Q, Quanbeck Z, Bechtold JE, Kaufman DS: **Angiogenic activity mediates**  
613 **bone repair from human pluripotent stem cell-derived osteogenic cells.** *Sci Rep* 2016,  
614 **6**:22868.

- 615 28. Ferrell PI, Hexum MK, Kopher RA, Lepley MA, Gussiaas A, Kaufman DS: **Functional**  
616 **assessment of hematopoietic niche cells derived from human embryonic stem cells.** *Stem*  
617 *Cells Dev* 2014, **23**(12):1355-1363.
- 618 29. Ronald L. Wasserstein, Lazar NA: **The ASA's Statement on p-Values: Context, Process,**  
619 **and Purpose.** *The American Statistician* 2016, **70**(2):129-133.
- 620 30. Antonescu CR, Yoshida A, Guo T, Chang NE, Zhang L, Agaram NP, Qin LX, Brennan MF,  
621 Singer S, Maki RG: **KDR activating mutations in human angiosarcomas are sensitive to**  
622 **specific kinase inhibitors.** *Cancer Res* 2009, **69**(18):7175-7179.
- 623 31. Antonescu C: **Malignant vascular tumors--an update.** *Mod Pathol* 2014, **27 Suppl 1**:S30-  
624 38.
- 625 32. Scott MC, Sarver AL, Gavin KJ, Thayanithy V, Getzy DM, Newman RA, Cutter GR,  
626 Lindblad-Toh K, Kisseberth WC, Hunter LE *et al*: **Molecular subtypes of osteosarcoma**  
627 **identified by reducing tumor heterogeneity through an interspecies comparative**  
628 **approach.** *Bone* 2011, **49**(3):356-367.
- 629 33. Kodama A, Sakai H, Matsuura S, Murakami M, Murai A, Mori T, Maruo K, Kimura T,  
630 Masegi T, Yanai T: **Establishment of canine hemangiosarcoma xenograft models**  
631 **expressing endothelial growth factors, their receptors, and angiogenesis-associated**  
632 **homeobox genes.** *BMC Cancer* 2009, **9**:363.
- 633 34. Murai A, Asa SA, Kodama A, Hirata A, Yanai T, Sakai H: **Constitutive phosphorylation of**  
634 **the mTORC2/Akt/4E-BP1 pathway in newly derived canine hemangiosarcoma cell**  
635 **lines.** *BMC Vet Res* 2012, **8**:128.
- 636 35. Andersen NJ, Nickoloff BJ, Dykema KJ, Boguslawski EA, Krivochenitser RI, Froman RE,  
637 Dawes MJ, Baker LH, Thomas DG, Kamstock DA *et al*: **Pharmacologic inhibition of MEK**

- 638 **signaling prevents growth of canine hemangiosarcoma.** *Mol Cancer Ther* 2013,  
639 **12(9):1701-1714.**
- 640 36. Scott MC, Tomiyasu H, Garbe JR, Cornax I, Amaya C, O'Sullivan MG, Subramanian S,  
641 Bryan BA, Modiano JF: **Heterotypic mouse models of canine osteosarcoma recapitulate**  
642 **tumor heterogeneity and biological behavior.** *Dis Model Mech* 2016, **9(12):1435-1444.**
- 643 37. Lashnits E, Neupane P, Bradley JM, Richardson T, Thomas R, Linder KE, Breen M, Maggi  
644 RG, Breitschwerdt EB: **Molecular prevalence of Bartonella, Babesia, and hemotropic**  
645 **Mycoplasma species in dogs with hemangiosarcoma from across the United States.**  
646 *PLoS One* 2020, **15(1):e0227234.**
- 647 38. Chomel BB, Boulouis HJ, Maruyama S, Breitschwerdt EB: **Bartonella spp. in pets and**  
648 **effect on human health.** *Emerg Infect Dis* 2006, **12(3):389-394.**
- 649 39. Engel P, Dehio C: **Genomics of host-restricted pathogens of the genus bartonella.**  
650 *Genome Dyn* 2009, **6:158-169.**
- 651 40. Wang G, Wu M, Maloneyhuss MA, Wojcik J, Durham AC, Mason NJ, Roth DB: **Actionable**  
652 **mutations in canine hemangiosarcoma.** *PLoS One* 2017, **12(11):e0188667.**
- 653 41. Megquier K, Turner-Maier J, Swofford R, Kim JH, Sarver AL, Wang C, Sakthikumar S,  
654 Johnson J, Koltookian M, Lewellen M *et al*: **Comparative Genomics Reveals Shared**  
655 **Mutational Landscape in Canine Hemangiosarcoma and Human Angiosarcoma.** *Mol*  
656 *Cancer Res* 2019, **17(12):2410-2421.**
- 657 42. Wang G, Wu M, Durham AC, Radaelli E, Mason NJ, Xu X, Roth DB: **Molecular subtypes**  
658 **in canine hemangiosarcoma reveal similarities with human angiosarcoma.** *PLoS One*  
659 2020, **15(3):e0229728.**

- 660 43. Beca F, Krings G, Chen YY, Hosfield EM, Vohra P, Sibley RK, Troxell ML, West RB,  
661 Allison KH, Bean GR: **Primary mammary angiosarcomas harbor frequent mutations in**  
662 **KDR and PIK3CA and show evidence of distinct pathogenesis.** *Mod Pathol* 2020,  
663 **33(8):1518-1526.**
- 664 44. Chan JY, Lim JQ, Yeong J, Ravi V, Guan P, Boot A, Tay TKY, Selvarajan S, Md Nasir ND,  
665 Loh JH *et al*: **Multomic analysis and immunoprofiling reveal distinct subtypes of**  
666 **human angiosarcoma.** *J Clin Invest* 2020, **130(11):5833-5846.**
- 667 45. Painter CA, Jain E, Tomson BN, Dunphy M, Stoddard RE, Thomas BS, Damon AL, Shah S,  
668 Kim D, Gomez Tejada Zanudo J *et al*: **The Angiosarcoma Project: enabling genomic and**  
669 **clinical discoveries in a rare cancer through patient-partnered research.** *Nat Med* 2020,  
670 **26(2):181-187.**
- 671 46. Choorapoikayil S, Weijts B, Kers R, de Bruin A, den Hertog J: **Loss of Pten promotes**  
672 **angiogenesis and enhanced vegfaa expression in zebrafish.** *Dis Model Mech* 2013,  
673 **6(5):1159-1166.**
- 674 47. Borgatti A, Koopmeiners JS, Sarver AL, Winter AL, Stuebner K, Todhunter D, Rizzardi AE,  
675 Henriksen JC, Schmechel S, Forster CL *et al*: **Safe and Effective Sarcoma Therapy**  
676 **through Bispecific Targeting of EGFR and uPAR.** *Mol Cancer Ther* 2017, **16(5):956-965.**
- 677 48. Borgatti A, Fieberg A, Winter AL, Stuebner K, Taras E, Todhunter D, Masyr A, Rendhal A,  
678 Vallera DA, Koopmeiners JS *et al*: **Impact of repeated cycles of EGF bispecific angiotoxin**  
679 **(eBAT) administered at a reduced interval from doxorubicin chemotherapy in dogs**  
680 **with splenic haemangiosarcoma.** *Vet Comp Oncol* 2020, **18(4):664-674.**
- 681 49. Xie W, Lin P, Konoplev S: **An unexpected diagnosis: angiosarcoma with bone marrow**  
682 **involvement mimicking a myeloproliferative neoplasm.** *Br J Haematol* 2019, **184(4):495.**

- 683 50. Miura M, Miura Y, Padilla-Nash HM, Molinolo AA, Fu B, Patel V, Seo BM, Sonoyama W,  
684 Zheng JJ, Baker CC *et al*: **Accumulated chromosomal instability in murine bone marrow**  
685 **mesenchymal stem cells leads to malignant transformation.** *Stem Cells* 2006, **24**(4):1095-  
686 1103.
- 687 51. Foudah D, Redaelli S, Donzelli E, Bentivegna A, Miloso M, Dalpra L, Tredici G:  
688 **Monitoring the genomic stability of in vitro cultured rat bone-marrow-derived**  
689 **mesenchymal stem cells.** *Chromosome Res* 2009, **17**(8):1025-1039.
- 690 52. Jeong JO, Han JW, Kim JM, Cho HJ, Park C, Lee N, Kim DW, Yoon YS: **Malignant tumor**  
691 **formation after transplantation of short-term cultured bone marrow mesenchymal**  
692 **stem cells in experimental myocardial infarction and diabetic neuropathy.** *Circ Res*  
693 2011, **108**(11):1340-1347.
- 694 53. Chen K, Ahmed S, Adeyi O, Dick JE, Ghanekar A: **Human solid tumor xenografts in**  
695 **immunodeficient mice are vulnerable to lymphomagenesis associated with Epstein-Barr**  
696 **virus.** *PLoS One* 2012, **7**(6):e39294.
- 697 54. Fujii E, Kato A, Chen YJ, Matsubara K, Ohnishi Y, Suzuki M: **Characterization of EBV-**  
698 **related lymphoproliferative lesions arising in donor lymphocytes of transplanted**  
699 **human tumor tissues in the NOG mouse.** *Exp Anim* 2014, **63**(3):289-296.
- 700 55. Bondarenko G, Ugolkov A, Rohan S, Kulesza P, Dubrovskiy O, Gursel D, Mathews J,  
701 O'Halloran TV, Wei JJ, Mazar AP: **Patient-Derived Tumor Xenografts Are Susceptible to**  
702 **Formation of Human Lymphocytic Tumors.** *Neoplasia* 2015, **17**(9):735-741.
- 703 56. Tillman H, Vogel P, Rogers T, Akers W, Rehg JE: **Spectrum of Posttransplant**  
704 **Lymphoproliferations in NSG Mice and Their Association With EBV Infection After**  
705 **Engraftment of Pediatric Solid Tumors.** *Vet Pathol* 2020, **57**(3):445-456.

- 706 57. Weiskopf K, Anderson KL, Ito D, Schnorr PJ, Tomiyasu H, Ring AM, Bloink K, Efe J, Rue  
707 S, Lowery D *et al*: **Eradication of Canine Diffuse Large B-Cell Lymphoma in a Murine**  
708 **Xenograft Model with CD47 Blockade and Anti-CD20**. *Cancer Immunol Res* 2016,  
709 **4**(12):1072-1087.
- 710 58. Ito D, Endicott MM, Jubala CM, Helm KM, Burnett RC, Husbands BD, Borgatti A, Henson  
711 MS, Burgess KE, Bell JS *et al*: **A tumor-related lymphoid progenitor population**  
712 **supports hierarchical tumor organization in canine B-cell lymphoma**. *J Vet Intern Med*  
713 2011, **25**(4):890-896.
- 714 59. Zhang Q, Orlando EJ, Wang HY, Bogusz AM, Liu X, Lacey SF, Strauser HT, Nunez-Cruz S,  
715 Nejati R, Zhang P *et al*: **Transdifferentiation of lymphoma into sarcoma associated with**  
716 **profound reprogramming of the epigenome**. *Blood* 2020, **136**(17):1980-1983.
- 717 60. Tonomura N, Elvers I, Thomas R, Megquier K, Turner-Maier J, Howald C, Sarver AL,  
718 Swofford R, Frantz AM, Ito D *et al*: **Genome-wide association study identifies shared risk**  
719 **loci common to two malignancies in golden retrievers**. *PLoS Genet* 2015, **11**(2):e1004922.

720

## 721 **Figure legends**

722 **Figure 1. Immune cell infiltration and comparative immune signatures between canine**  
723 **hemangiosarcoma and human angiosarcoma.** (A and B) Representative photomicrographs of  
724 H&E and immunohistochemical staining showing histological morphology and immune cell  
725 infiltration in canine hemangiosarcoma (A) and human angiosarcoma tissues (B) using anti-CD3,  
726 anti-PAX5, anti-MAC387, and anti-Iba1 (for canine) or anti-CD163 (for human) antibodies for  
727 detecting T cell, B cell, and macrophages. H&E = hematoxylin and eosin. Horseradish  
728 peroxidase or alkaline phosphate (for Iba1) conjugates were used. Counterstain = hematoxylin.



729 Bar = 100 um. (C and D) Scatter plots display correlation between transcriptional and  
730 immunohistochemical immune score in canine hemangiosarcoma (C) and human angiosarcoma  
731 (D). Spearman's correlation coefficient (R) was calculated. (E) 461 upregulated genes were  
732 identified in immune-high (N = 8) compared to immune-low (N = 5) groups in human  
733 angiosarcomas (FDR P value < 0.05). (F) 567 immune gene signatures were identified among  
734 three molecular subtypes of canine hemangiosarcomas (N = 76; FDR P value < 0.001; fold  
735 change > 3). The heatmaps show up-regulated (red) and down-regulated (green) genes by  
736 unsupervised hierarchical clustering (average linkage; mean-centered; log<sup>2</sup> transformed). (G)  
737 Venn diagram shows 58 common genes associated with signaling pathways of immune cell  
738 functions between human and canine tumors.

739

740 **Figure 2. Establishment of xenografts derived from canine hemangiosarcoma in**

741 **immunodeficient mice.** (A) Schematic illustration depicts process of tumor xenografts in beige-  
742 nude-xid (BNX) mice. (B) DHSA-1426 hemangiosarcoma cells were established from canine  
743 patient-derived tumor fragments. DHSA-1426 cells formed tumors histologically classified as  
744 hemangiosarcoma. Left panel: H&E stain was done in xenograft tumor tissue. Right panel:  
745 Immunohistochemistry was performed for detection of CD31 protein (alkaline phosphatase  
746 conjugates; counterstain = hematoxylin). Top panel: 100X magnification (Bar = 100 um);  
747 Bottom panel: 200X magnification (Bar = 50 um).

748

749 **Figure 3. Organization of tumor and stromal cells in mouse xenografts of canine**

750 **hemangiosarcoma, osteosarcoma, and lymphoma.** (A) Fluorescence *in situ* hybridization  
751 images using canine-specific (*IL8*, red) and mouse-specific (X chromosome, green) probes in a

752 canine hemangiosarcoma xenograft, a canine osteosarcoma xenograft, and a canine lymphoma  
753 xenograft transplanted into receptive immunodeficient female mouse hosts. Red and green  
754 arrows point to representative xenograft canine tumor cells and mouse stromal cells,  
755 respectively, to aid in identification. **(B)** Schematic representation of A, illustrating the  
756 organization of hemangiosarcoma, osteosarcoma, and lymphoma xenografts. **(C)** Individual  
757 points on graph represent relative quantity of donor (dog) and host (mouse) cells in each tumor  
758 type. 10-12 fields of pictures at high magnification (400X) per slide were acquired. A total of  
759 approximately 1,000 cells in individual xenograft tumor was counted, and the percentages for  
760 each species-cells are presented.

761

762 **Figure 4. Canine hemangiosarcoma cells support expansion and differentiation of CD34+**  
763 **human umbilical cord blood (hUCB) cells.** **(A)** Flow cytometric data show populations of cells  
764 expressing CD43 and CD45 differentiated from CD34+ hUCB cells. CD34+ hUCB cells were  
765 pooled from two patients. M2-10B4, hBM-MSCs, and canine hemangiosarcoma cells (DHSA-  
766 1426 and EFB) were seeded on gelatin-coated 24-well plates at a density of  $1 \times 10^5$  cells/well.  
767 Gelatin-coated wells without stroma served as a negative control. Surface antigens of CD34,  
768 CD43, and CD45 were analyzed at week 5. **(B and C)** Bar graphs show number of different  
769 colonies formed by hUCB CD34+ cells co-cultured with feeder cells. Both DHSA-1426 and  
770 EFB canine hemangiosarcoma cell lines expanded hUCB CD34+ cells similar to the M2-10B4  
771 and hBM-MSC positive control lines, while gelatin-coated wells alone failed to support  
772 expansion. Burst-forming unit-erythroid (BFU-E), CFU (colony-forming unit)-Erythroid (CFU-  
773 E), CFU-Granulocyte/Macrophage (CFU-GM), CFU-Macrophage (CFU-M), and CFU-

774 Granulocyte/Erythroid/Macrophage/Megakaryocyte (CFU-GEMM) were determined for CFU  
775 assay.

776

777 **Figure 5. Gene expression signature of hematopoietic and immune cell function enriched in**

778 **hemangiosarcoma tissues.** Bar graphs show representative gene signature enrichment

779 associated with bone marrow niche cells, endothelial and hematopoietic progenitor, myeloid and

780 macrophage, signaling network, and hematopoietic cytokines between hemangiosarcoma (N =

781 76) and hematoma tissues (N = 10). Expression values represent count per million reads

782 calculated by RNA-seq transcriptomic data. CAR = CXC chemokine ligand 12 (CXCL12)-

783 abundant reticular; MSC = mesenchymal stromal cell; LepR = Leptin Receptor. P values and

784 statistical significance were determined by Mann-Whitney U test. \*, P <0.05; \*\*, P < 0.01; \*\*\*,

785 P < 0.001; \*\*\*\*, P < 0.0001.

786

787 **Figure 6. Gene expression signature of hematopoietic and immune cell function enriched in**

788 **hemangiosarcoma cells.** Bar graphs representative gene expression associated with bone

789 marrow niche cells, endothelial and hematopoietic progenitor, myeloid and macrophage,

790 signaling network, and hematopoietic cytokines between hemangiosarcoma cell lines (N = 11)

791 and hematoma cells (N = 4). Expression value represents count per million reads calculated by

792 RNA-seq transcriptomic data. CAR = CXC chemokine ligand 12 (CXCL12)-abundant reticular;

793 MSC = mesenchymal stromal cell; LepR = Leptin Receptor. P values and statistical significance

794 were determined by Mann-Whitney U test. \*, P <0.05; \*\*, P < 0.01; \*\*\*, P < 0.001; \*\*\*\*, P <

795 0.0001.

796

797 **Figure 7. Hypothetical models for establishment of distinct molecular phenotypes of canine**  
798 **hemangiosarcoma.** Non-mutually exclusive models illustrate discreet cells of origin for distinct  
799 molecular subtypes of hemangiosarcoma. Hemangiosarcoma may progress from bone marrow  
800 nurse cells that create a niche for hematopoietic expansion and inflammation, to a transitional  
801 pro-angiogenic state and full progression to a pure angiogenic state, or to malignant  
802 transformation with an inflammatory phenotype.

# Figure 1

## A Canine

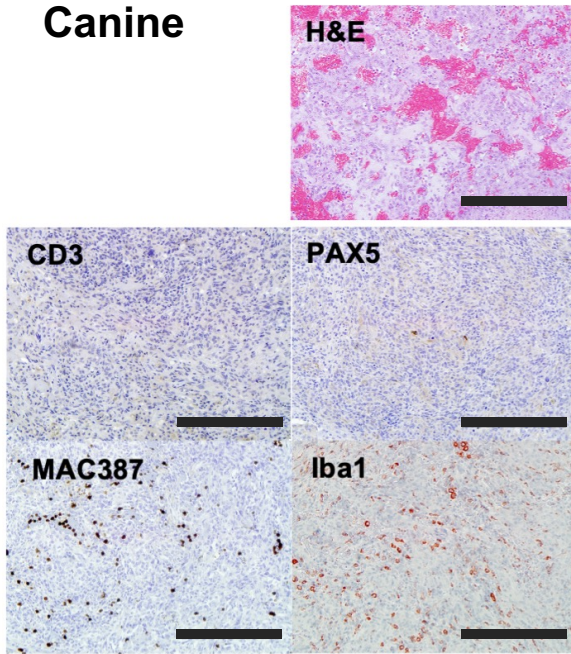

## B Human

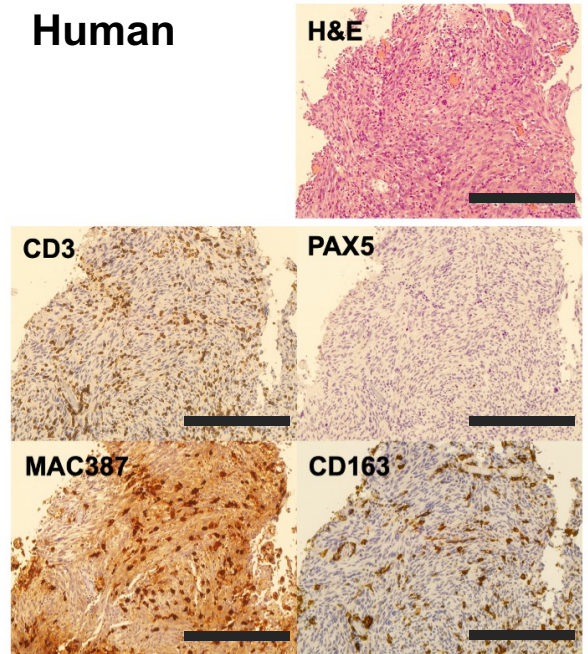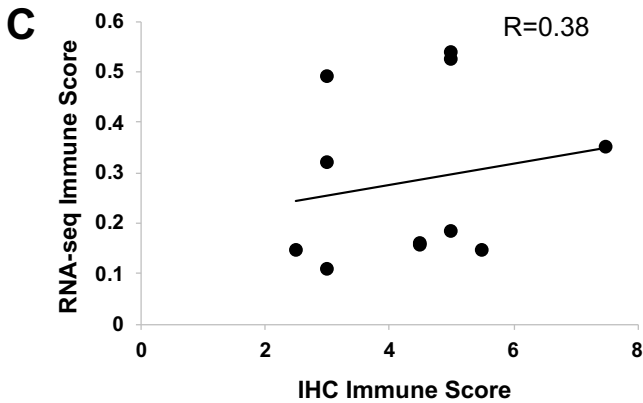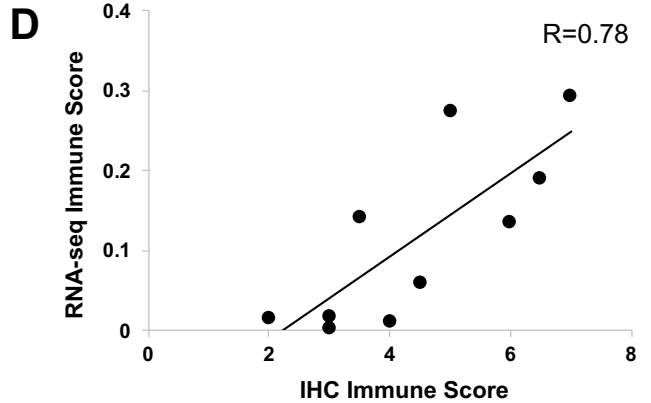

## E Human

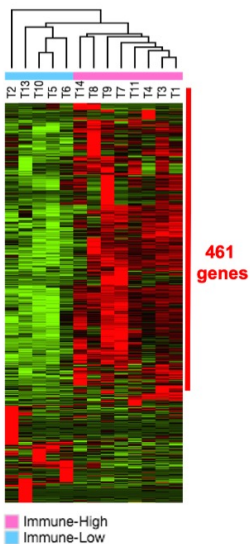

## F Canine

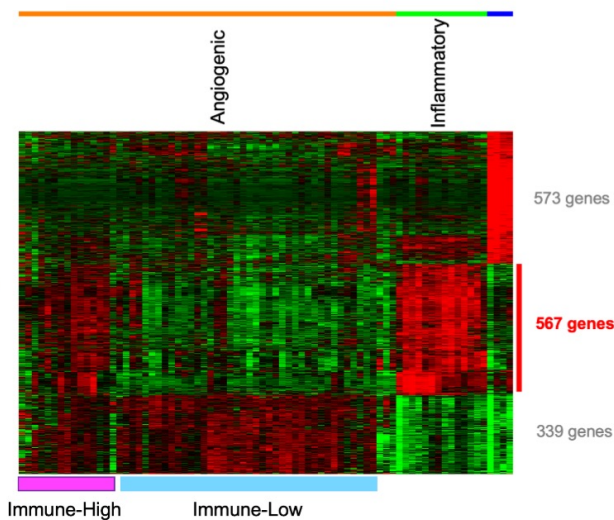

## G

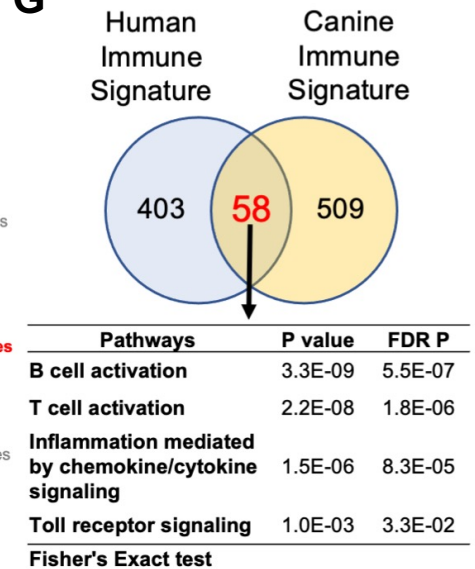

**Figure 2**

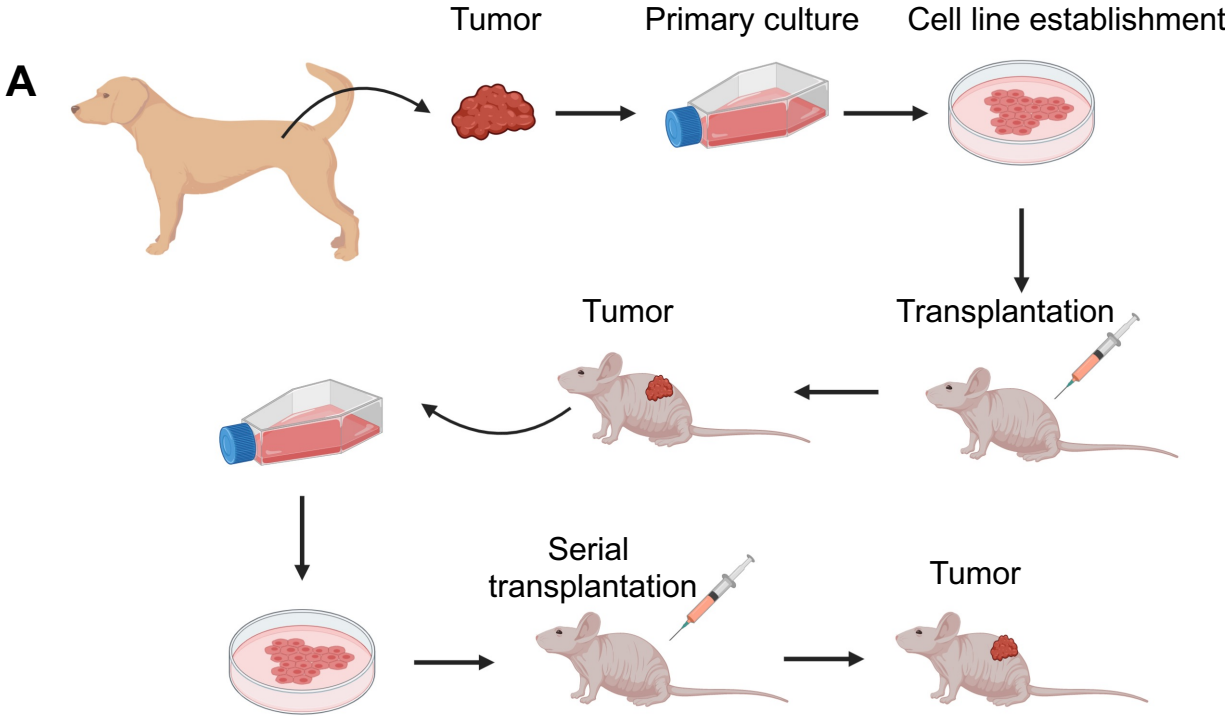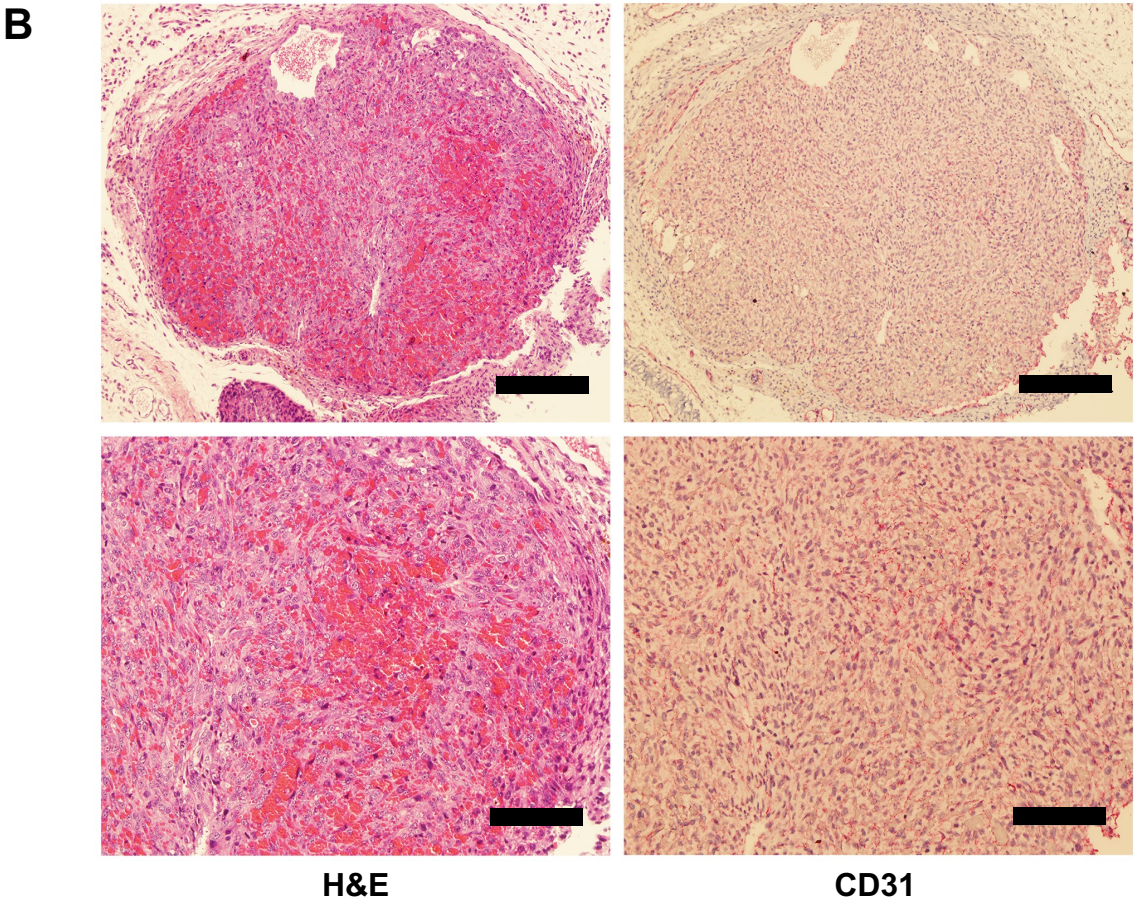

**Figure 3**

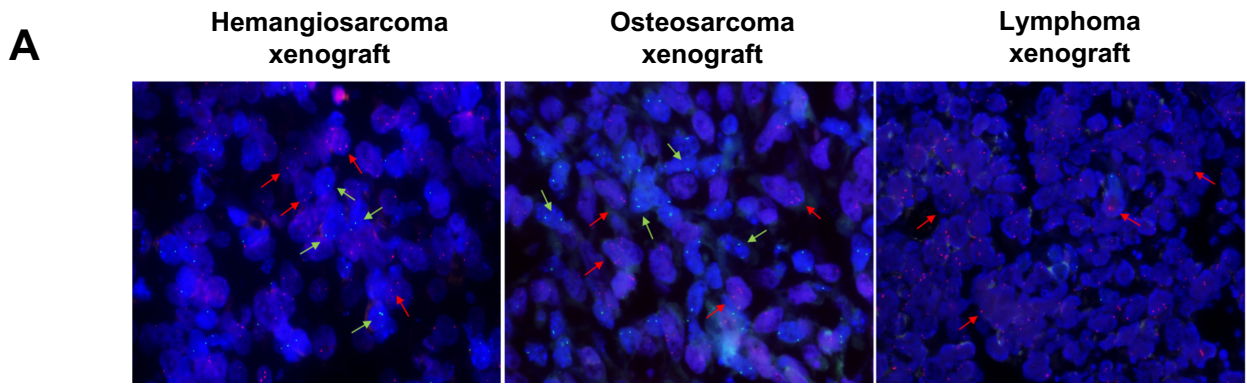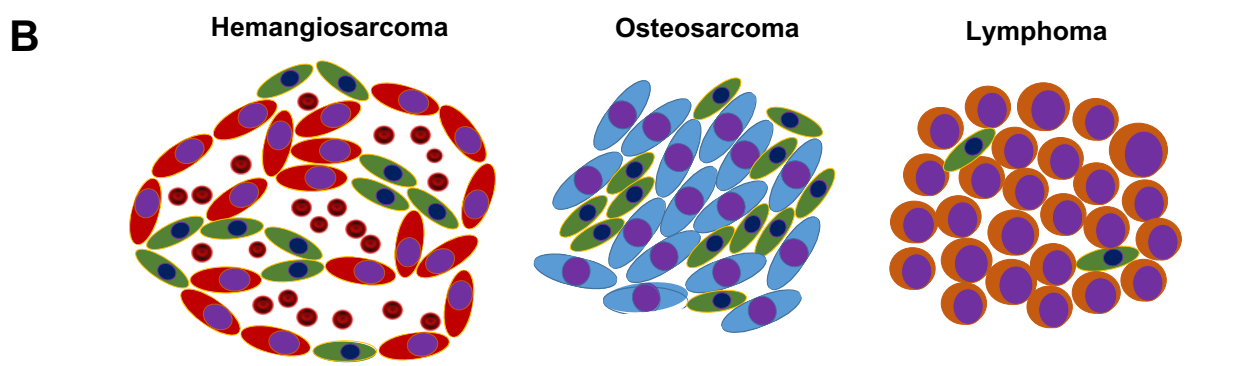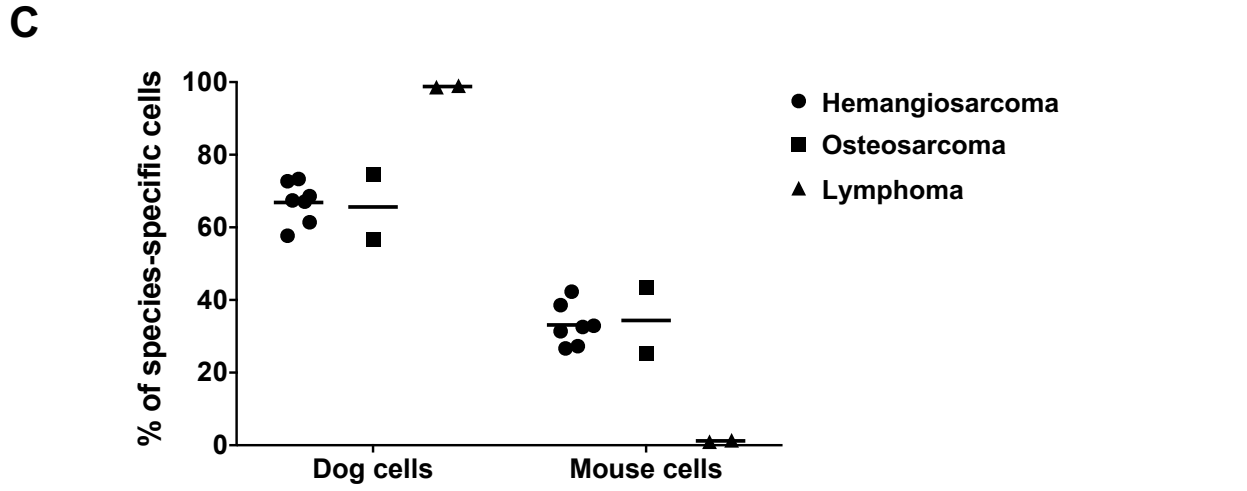

**Figure 4**

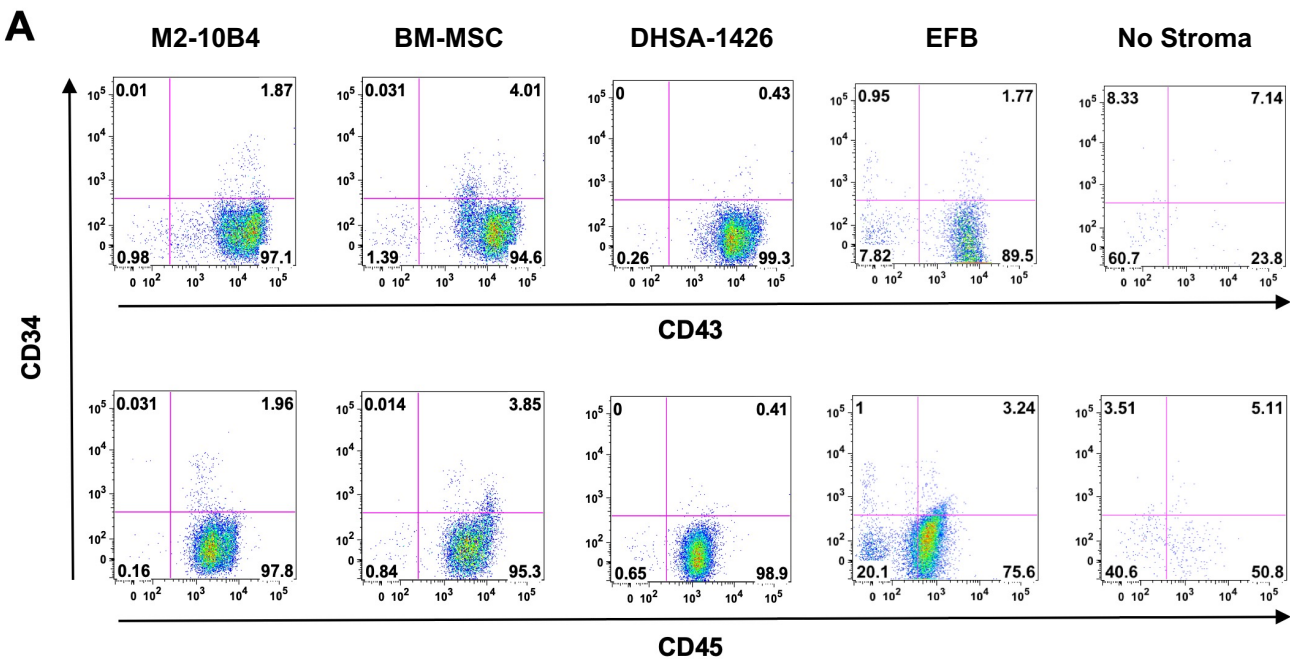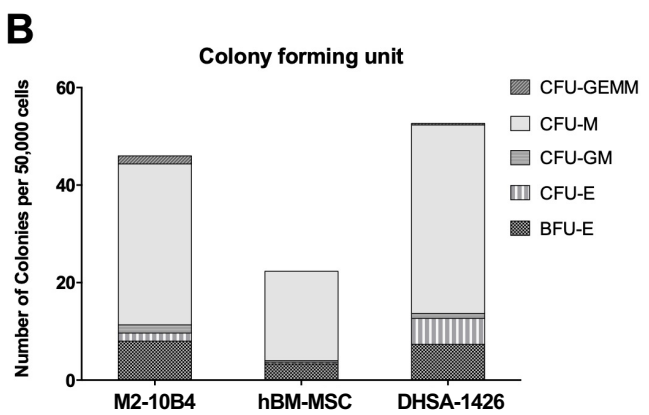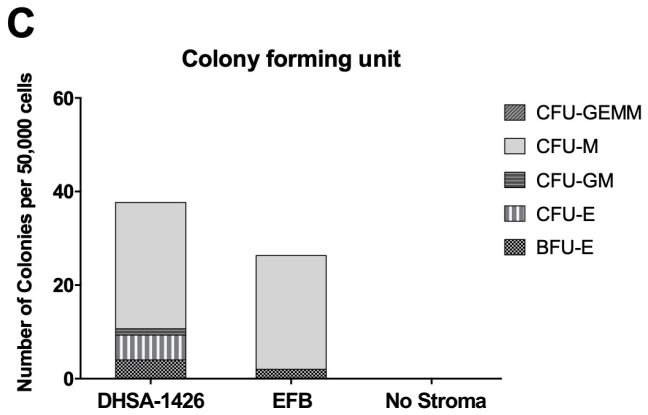



**Figure 5**

█ Hemangiosarcoma (N=76)  
█ Hematoma (N=10)

**Tissues**

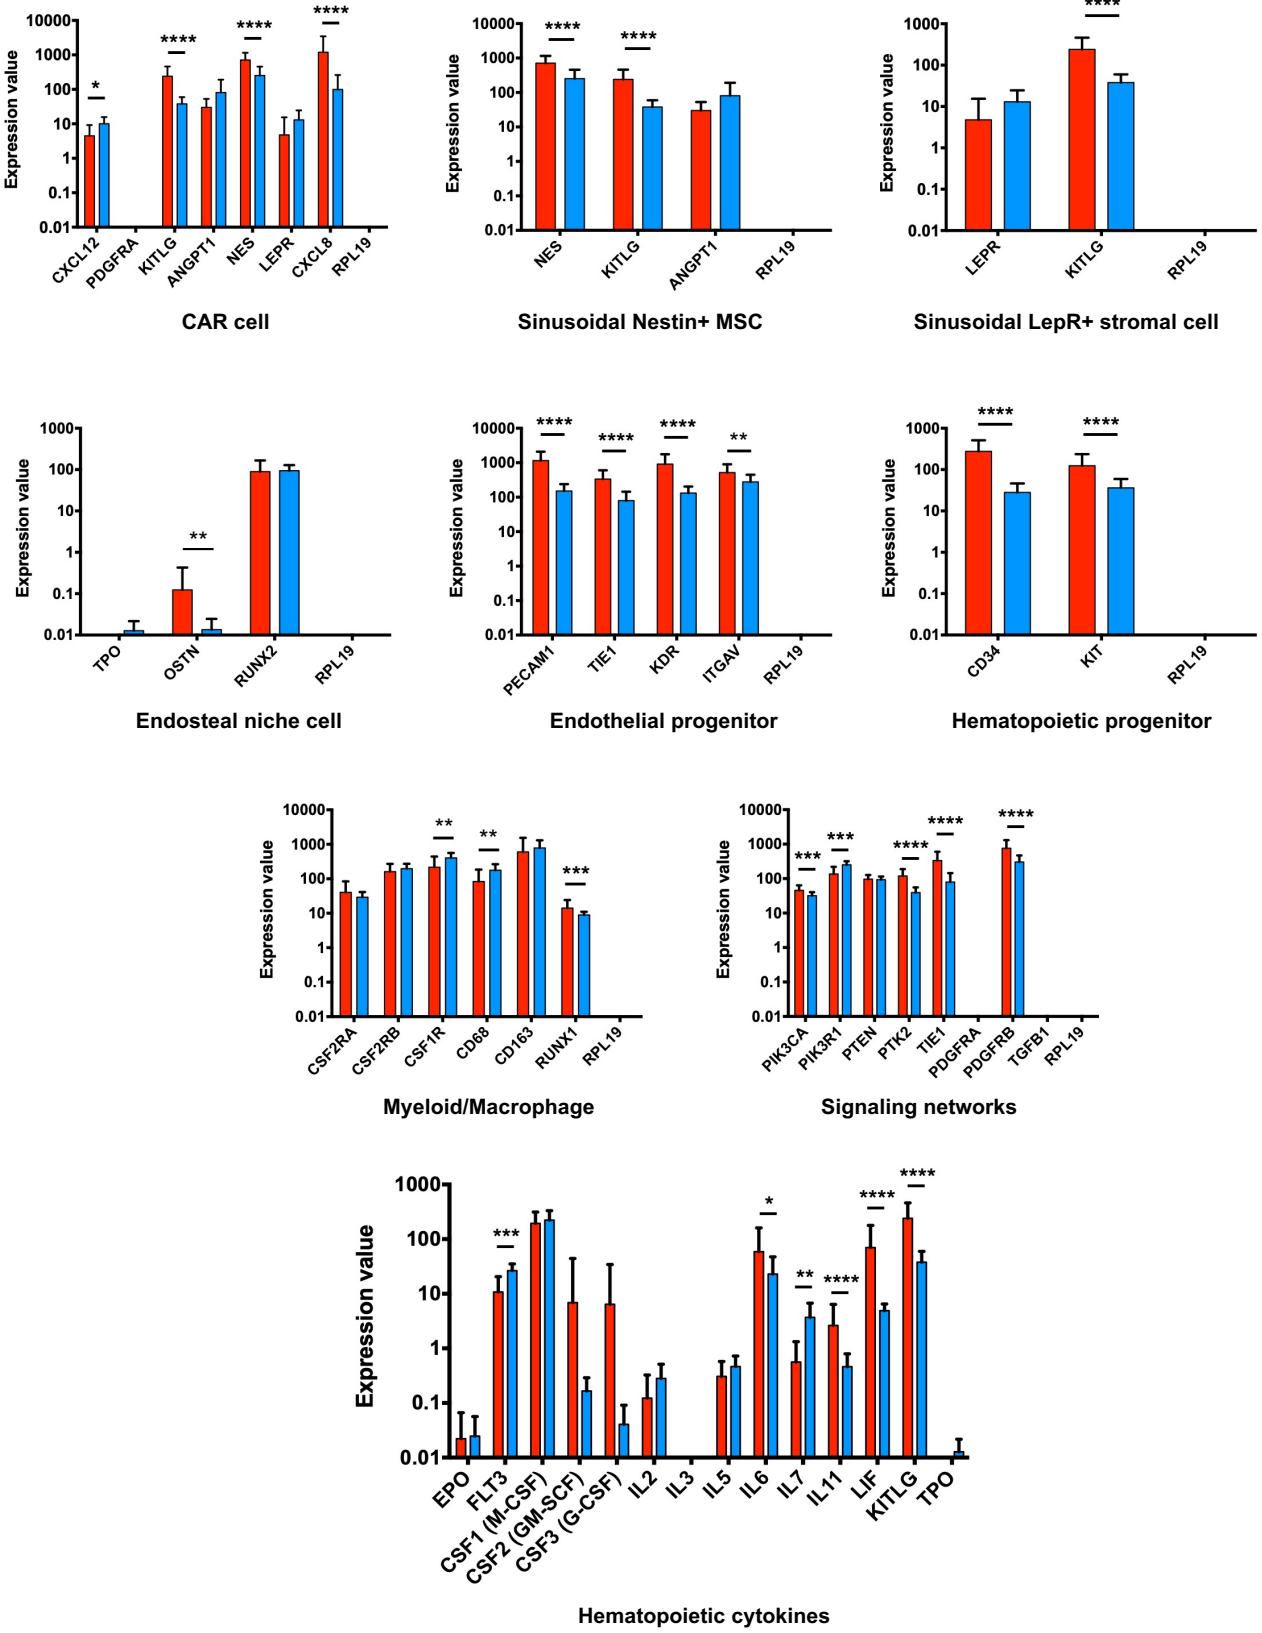

**Figure 6**

**Cells**

■ Hemangiosarcoma (N=11)  
■ Hematoma (N=4)

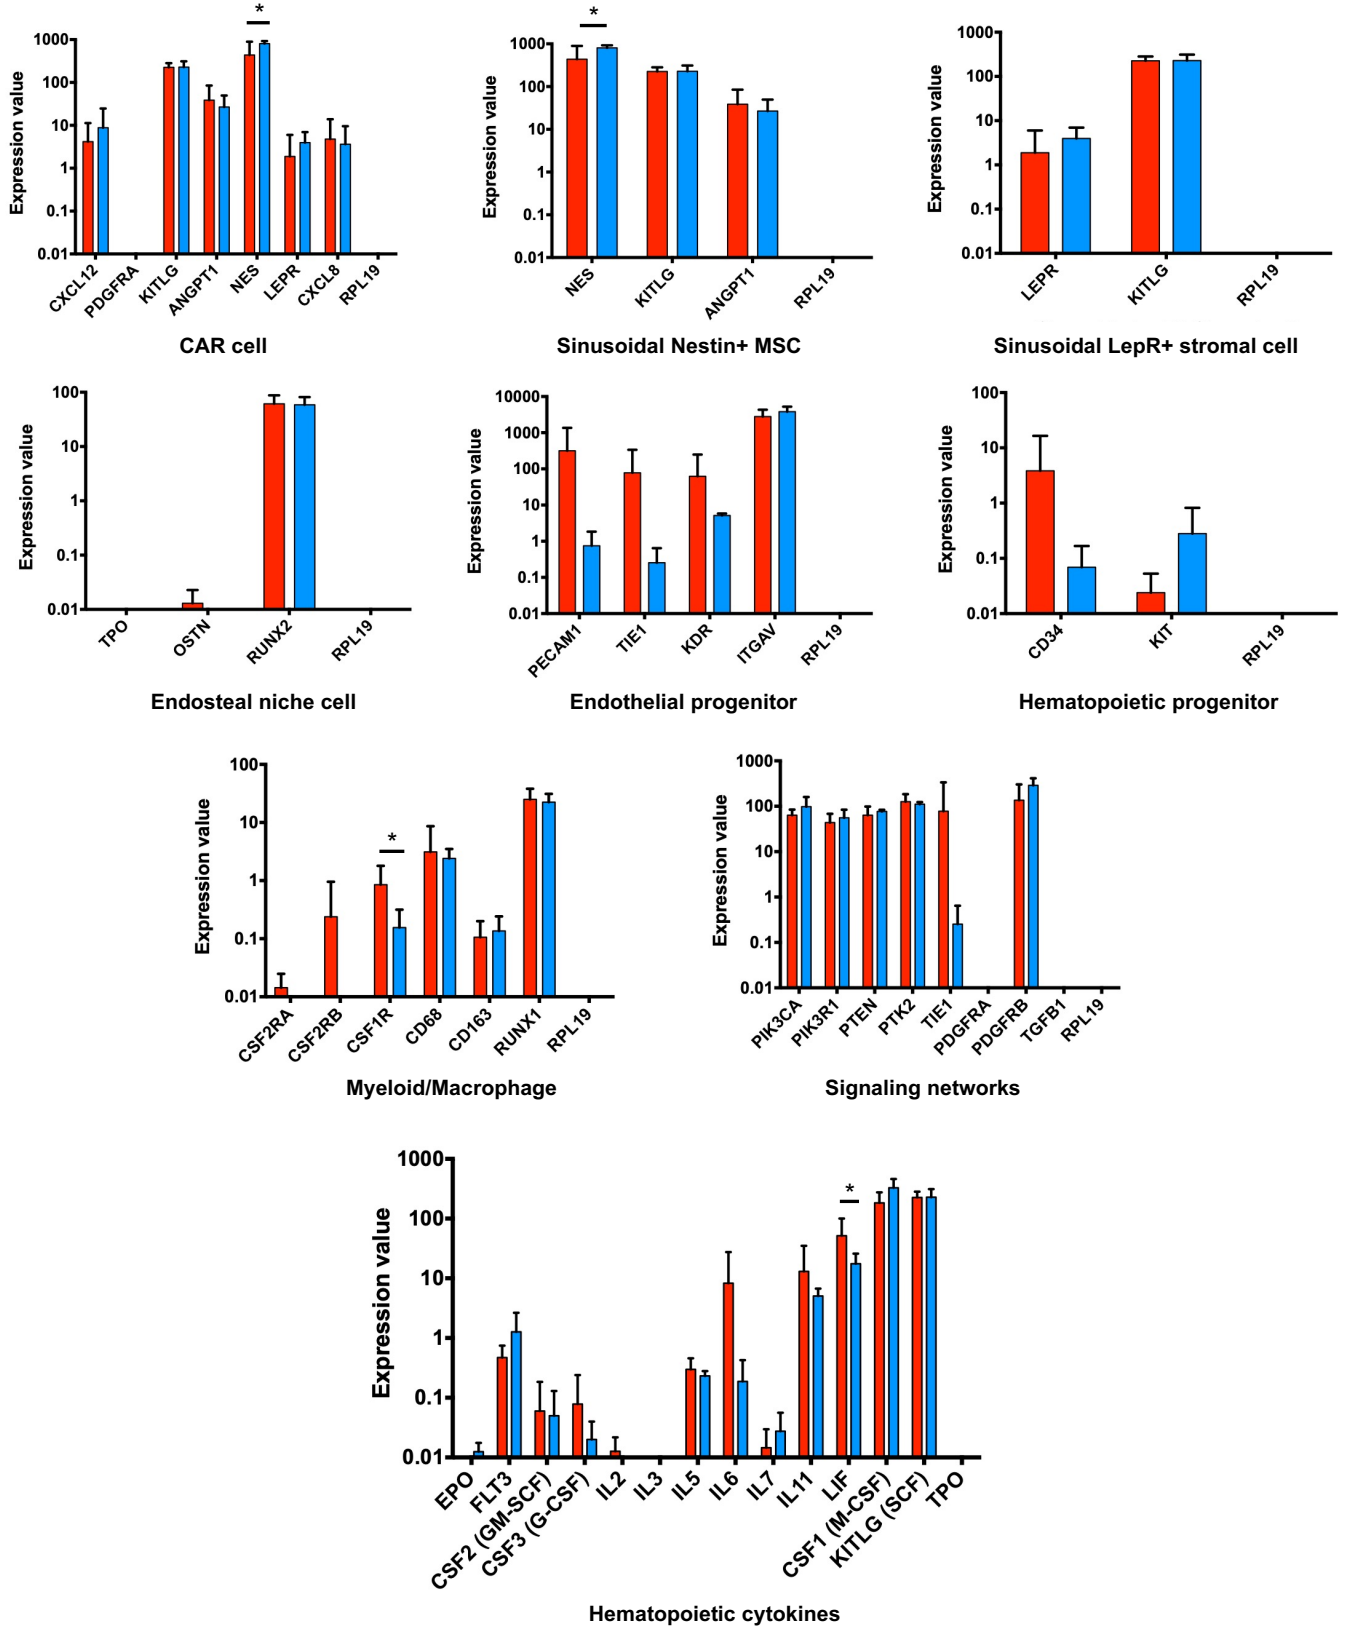

Figure 7

### Angiogenic hemangiosarcoma

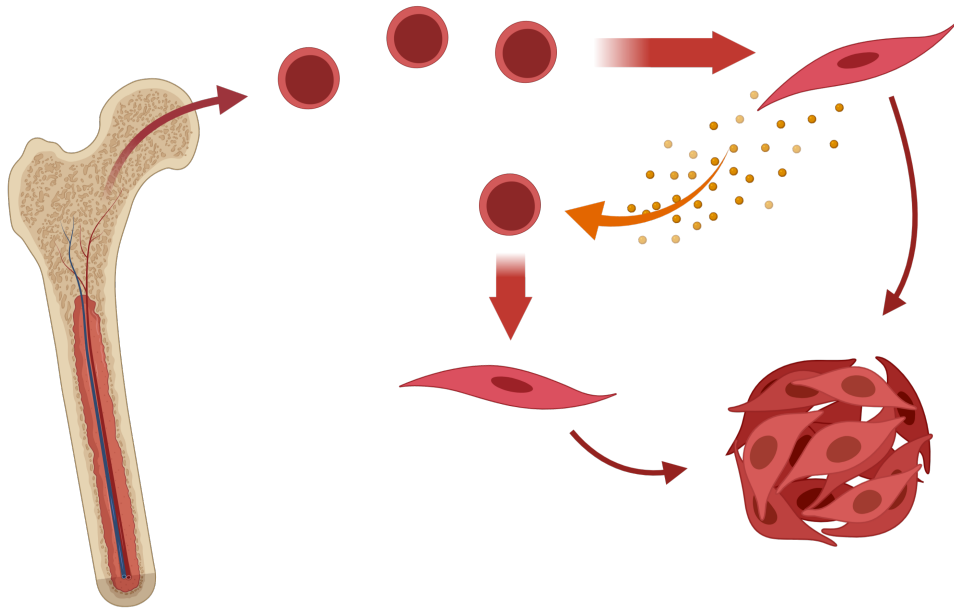

### Inflammatory hemangiosarcoma

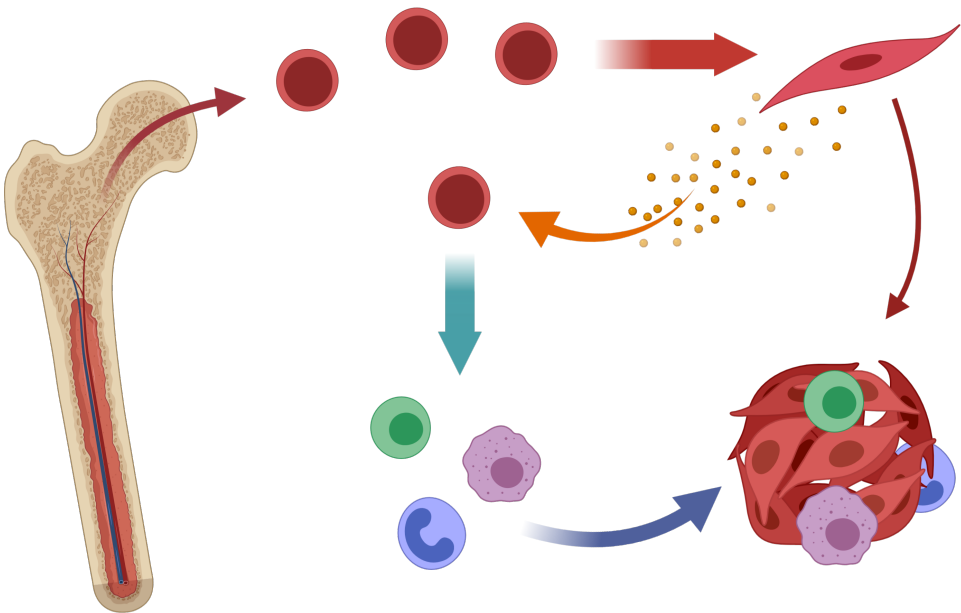

- |                                                                                     |                          |                                                                                     |               |
|-------------------------------------------------------------------------------------|--------------------------|-------------------------------------------------------------------------------------|---------------|
|  | Hematopoietic progenitor |  | Lymphoid cell |
|  | Hemangiosarcoma cell     |  | Macrophage    |
|  | Cytokines                |  | Neutrophil    |
